# Supplementary material for: A plant pathology perspective of fungal genome sequencing
Source: PubMed Central journal article supplement — IMA Fungus. 2017 Feb 9;8(1):1–15. doi: 10.5598/imafungus.2017.08.01.01 (PMC5493528; doi:10.5598/imafungus.2017.08.01.01), 2017-02-09
Supplement: SD1.pdf [file SD1.pdf]

## Supplementary File 1: Ascomycota, Basidiomycota, and Early-diverging

## Sequenced Ascomycota species

| SPECIES                               | PHYLUM     | SUBPHYLUM      | Classification  |                   |                  |                    | Strain        | GOLD Accession | GENOME Accession | NCBI Project ID | Significance                                                | Genome statistics |          |              |                |         | GC             | Technology            |
|---------------------------------------|------------|----------------|-----------------|-------------------|------------------|--------------------|---------------|----------------|------------------|-----------------|-------------------------------------------------------------|-------------------|----------|--------------|----------------|---------|----------------|-----------------------|
|                                       |            |                | CLASS           | SUBCLASS          | ORDER            | FAMILY             |               |                |                  |                 |                                                             | Size (Mb)         | coverage | # of contigs | # of scaffolds | # genes |                |                       |
|                                       |            |                |                 |                   |                  |                    |               |                |                  |                 |                                                             |                   |          |              |                |         |                |                       |
| Cerataphis brasiliensis yeast-like    | Ascomycota | Incertae sedis | Incertae sedis  | Incertae sedis    | Incertae sedis   | Incertae sedis     | not specified | Gp0039293      | AOPF01           | 169168          | arthropod associated (aphid symbiont)                       | 25.5              | 39.00    | 11971        | 1181           | 56      | illumina HiSeq |                       |
| Endocalyx cinctus                     | Ascomycota | Incertae sedis | Incertae sedis  | Incertae sedis    | Incertae sedis   | Incertae sedis     | JCM 7946      | Gp0143759      | BCKC01           | 313891          | uncertain saprotroph                                        | 44.77             | 252.00   | 178          | 17             | 45.4    | HiSeq 2500     |                       |
| Nilaparvata lugens yeast-like symbi   | Ascomycota | Incertae sedis | Incertae sedis  | Incertae sedis    | Incertae sedis   | Incertae sedis     | not specified | Gp0076238      | JRMI01           | 177649          | uncertain                                                   | 26,809            | 193.00   | 2794         | 578            | 55      | 454; illumina  |                       |
| Aplosporella prunicola                | Ascomycota | Peziomycotina  | Dothideomycetes | Incertae sedis    | Botryosphaerales | Aplosporellaceae   | CBS 121167    | Gp0019419      | JGI              | 196034          | probable tree pathogen                                      | 32.82             | 194      | 763          | 334            | 12579   |                |                       |
| Aplosporella prunicola                | Ascomycota | Peziomycotina  | Dothideomycetes | Incertae sedis    | Botryosphaerales | Aplosporellaceae   | CBS 121167    | Gp0019419      | JGI              | 196034          | probable tree pathogen                                      | 32.82             | 194.00   | 763          | 334            | 12579   |                |                       |
| Botryosphaeria dothidea               | Ascomycota | Peziomycotina  | Dothideomycetes | Incertae sedis    | Botryosphaerales | Botryosphaeriaceae | CBS 115476    | Gp0038455      | AYEP01           | 81801           | plant pathogen (broad host range of trees and shrubs)       | 43.5              |          | 3301         | 1711           | 14998   |                |                       |
| Botryosphaeria dothidea               | Ascomycota | Peziomycotina  | Dothideomycetes | Incertae sedis    | Botryosphaerales | Botryosphaeriaceae | CBS 115476    | Gp0038455      | AYEP01           | 81801           | plant pathogen (broad host range of trees and shrubs)       | 43.5              |          | 3301         | 1711           | 14998   |                |                       |
| Diplodia pinea                        | Ascomycota | Peziomycotina  | Dothideomycetes | Incertae sedis    | Botryosphaerales | Botryosphaeriaceae | CMW39103      | Gp0093398      | JHUM01           | 242796          | plant pathogen (pines)                                      | 36,0534           | 10.00    | 2367         |                | 56.9    | illumina MiSeq |                       |
| Diplodia pinea                        | Ascomycota | Peziomycotina  | Dothideomycetes | Incertae sedis    | Botryosphaerales | Botryosphaeriaceae | CMW39103      | Gp0093398      | JHUM01           | 242796          | plant pathogen (pines)                                      | 36,0534           | 10.00    | 2367         |                | 56.9    | illumina MiSeq |                       |
| Diplodia scrobiculata                 | Ascomycota | Peziomycotina  | Dothideomycetes | Incertae sedis    | Botryosphaerales | Botryosphaeriaceae | CMW30223      | Gp0143864      | LAEG01           | 278001          | plant pathogen (conifer spp.)                               | 34.93             | 15       | 4037         | 3772           | 57      | illumina MiSeq |                       |
| Diplodia scrobiculata                 | Ascomycota | Peziomycotina  | Dothideomycetes | Incertae sedis    | Botryosphaerales | Botryosphaeriaceae | CMW30223      | Gp0143864      | LAEG01           | 278001          | plant pathogen (conifer spp.)                               | 34.93             | 15.00    | 4037         | 3772           | 57      | illumina MiSeq |                       |
| Diplodia seriata                      | Ascomycota | Peziomycotina  | Dothideomycetes | Incertae sedis    | Botryosphaerales | Botryosphaeriaceae | DS831         | Gp0117696      | LAQI01           | 261773          | plant pathogen (grapevine bot canker)                       | 37.12             | 78.93    | 1522         | 694            | 9343    | 56.7           | illumina HiSeq        |
| Diplodia seriata                      | Ascomycota | Peziomycotina  | Dothideomycetes | Incertae sedis    | Botryosphaerales | Botryosphaeriaceae | DS831         | Gp0117696      | LAQI01           | 261773          | plant pathogen (grapevine bot canker)                       | 37.12             | 78.93    | 1522         | 694            | 9343    | 56.7           | illumina HiSeq        |
| Guignardia citricarpa                 | Ascomycota | Peziomycotina  | Dothideomycetes | Incertae sedis    | Botryosphaerales | Botryosphaeriaceae | CGMCC3.14348  | Gp0041977      | AOTE01           | 188924          | plant pathogen (citrus)                                     | 32,007            | 300.00   | 6716         |                | 52.6    | 454; illumina  |                       |
| Guignardia citricarpa                 | Ascomycota | Peziomycotina  | Dothideomycetes | Incertae sedis    | Botryosphaerales | Botryosphaeriaceae | CGMCC3.14348  | Gp0041977      | AOTE01           | 188924          | plant pathogen (citrus)                                     | 32,007            | 300.00   | 6716         |                | 52.6    | 454; illumina  |                       |
| Macrophomina phaseolina               | Ascomycota | Peziomycotina  | Dothideomycetes | Incertae sedis    | Botryosphaerales | Botryosphaeriaceae | MS6           | Gp0044758      | AHHD01           | 78845           | plant pathogen (broad host range)                           | 48,882            | 66.00    | 1506         |                | 14712   | 52.3           | 454; illumina         |
| Macrophomina phaseolina               | Ascomycota | Peziomycotina  | Dothideomycetes | Incertae sedis    | Botryosphaerales | Botryosphaeriaceae | MS6           | Gp0044758      | AHHD01           | 78845           | plant pathogen (broad host range)                           | 48,882            | 66.00    | 1506         |                | 14712   | 52.3           | 454; illumina         |
| Neofusicoccum parvum                  | Ascomycota | Peziomycotina  | Dothideomycetes | Incertae sedis    | Botryosphaerales | Botryosphaeriaceae | UCRNP2        | Gp0039200      | AORE01           | 187491          | plant pathogen (grapevines)                                 | 42.59             | 100      | 1728         | 1297           | 10366   | 56.8           | illumina HiSeq        |
| Neofusicoccum parvum                  | Ascomycota | Peziomycotina  | Dothideomycetes | Incertae sedis    | Botryosphaerales | Botryosphaeriaceae | UCRNP2        | Gp0039200      | AORE01           | 187491          | plant pathogen (grapevines)                                 | 42.59             | 100.00   | 1728         | 1297           | 10366   | 56.8           | illumina HiSeq        |
| Phyllosticta capitalensis             | Ascomycota | Peziomycotina  | Dothideomycetes | Incertae sedis    | Botryosphaerales | Phyllostictaceae   | Gm33          |                | LOEO01           | 301361          | endophyte; weak plant pathogen                              | 32.45             | 70       | 1341         |                | 54.6    | IonTorrent     |                       |
| Phyllosticta capitalensis             | Ascomycota | Peziomycotina  | Dothideomycetes | Incertae sedis    | Botryosphaerales | Phyllostictaceae   | Gm33          |                | LOEO01           | 301361          | endophyte; weak plant pathogen                              | 32.45             | 70.00    | 1341         |                | 54.6    | IonTorrent     |                       |
| Phyllosticta citricarpa               | Ascomycota | Peziomycotina  | Dothideomycetes | Incertae sedis    | Botryosphaerales | Phyllostictaceae   | Gc12          | Gp0144687      | LOEN01           | 301361          | plant pathogen (citrus black spot)                          | 31.13             | 75       | 5748         |                | 53.1    | IonTorrent     |                       |
| Phyllosticta citricarpa               | Ascomycota | Peziomycotina  | Dothideomycetes | Incertae sedis    | Botryosphaerales | Phyllostictaceae   | Gc12          | Gp0144687      | LOEN01           | 301361          | plant pathogen (citrus black spot)                          | 31.13             | 75.00    | 5748         |                | 53.1    | IonTorrent     |                       |
| Phyllosticta citriana                 | Ascomycota | Peziomycotina  | Dothideomycetes | Incertae sedis    | Botryosphaerales | Phyllostictaceae   | CBS 120486    | Gp0032376      | 1011300          | 243943          | plant pathogen (citrus tan spot)                            | 32.7              | 88.60    | 741          | 133            | 11368   |                | illumina              |
| Saccharata proteae                    | Ascomycota | Peziomycotina  | Dothideomycetes | Incertae sedis    | Botryosphaerales | Saccharataceae     | CBS 121410    | Gp0033051      | JGI              | 196072          | endophyte; occasional plant pathogen                        | 31.43             | 98.8     | 727          | 245            | 9234    |                | illumina HiSeq        |
| Saccharata proteae                    | Ascomycota | Peziomycotina  | Dothideomycetes | Incertae sedis    | Botryosphaerales | Saccharataceae     | CBS 121410    | Gp0033051      | JGI              | 196072          | endophyte; occasional plant pathogen                        | 31.43             | 98.80    | 727          | 245            | 9234    |                | illumina HiSeq        |
| Polychaeton citri                     | Ascomycota | Peziomycotina  | Dothideomycetes | Dothideomycetidae | Capnodiales      | Capnodiaceae       | CBS 116435    | Gp0033215      | JGI              | 196013          | uncertain; mold (non-pathogenic sooty)                      | 27.21             | 145.2    | 451          | 416            | 10582   |                | illumina HiSeq        |
| Polychaeton citri                     | Ascomycota | Peziomycotina  | Dothideomycetes | Dothideomycetidae | Capnodiales      | Capnodiaceae       | CBS 116435    | Gp0033215      | JGI              | 196013          | uncertain; mold (non-pathogenic sooty)                      | 27.21             | 145.2    | 451          | 416            | 10582   |                | illumina HiSeq        |
| Cladosporium fulvum                   | Ascomycota | Peziomycotina  | Dothideomycetes | Dothideomycetidae | Capnodiales      | Cladosporiaceae    | not specified | JGI            |                  |                 | 61.11                                                       |                   | 5382     | 4865         | 14127          |         |                |                       |
| Cladosporium fulvum                   | Ascomycota | Peziomycotina  | Dothideomycetes | Dothideomycetidae | Capnodiales      | Cladosporiaceae    | not specified | JGI            |                  |                 | 61.11                                                       |                   | 5382     | 4865         | 14127          |         |                |                       |
| Cladosporium sphaerospermum           | Ascomycota | Peziomycotina  | Dothideomycetes | Dothideomycetidae | Capnodiales      | Cladosporiaceae    | UM 843        | Gp0021025      | AI1A02           | 85131           | human allergen; dermatiaceous                               | 26.89             | 98.00    | 877          | 155            |         | 56.6           | illumina              |
| Cladosporium sphaerospermum           | Ascomycota | Peziomycotina  | Dothideomycetes | Dothideomycetidae | Capnodiales      | Cladosporiaceae    | UM 843        | Gp0021025      | AI1A02           | 85131           | human allergen; dermatiaceous                               | 26.89             | 98.00    | 877          | 155            |         | 56.6           | illumina              |
| Dissoconium aciculare                 | Ascomycota | Peziomycotina  | Dothideomycetes | Dothideomycetidae | Capnodiales      | Dissoconiaceae     | CBS 342.82    | Gp0033050      | JGI              | 196071          | mycoparasitic (Erysiphaceae)                                | 26.54             | 97.7     | 232          | 54             | 10299   |                | illumina              |
| Dissoconium aciculare                 | Ascomycota | Peziomycotina  | Dothideomycetes | Dothideomycetidae | Capnodiales      | Dissoconiaceae     | CBS 342.82    | Gp0033050      | JGI              | 196071          | mycoparasitic (Erysiphaceae)                                | 26.54             | 97.70    | 232          | 54             | 10299   |                | illumina              |
| Pseudovirgaria hyperparasitica        | Ascomycota | Peziomycotina  | Dothideomycetes | Dothideomycetidae | Capnodiales      | Incertae sedis     | CBS 121739    | Gp0072276      | JGI              | 245627          | biocontrol (mycoparasite of rust)                           | 35.44             | 86.3     | 408          | 122            | 11232   |                | illumina              |
| Pseudovirgaria hyperparasitica        | Ascomycota | Peziomycotina  | Dothideomycetes | Dothideomycetidae | Capnodiales      | Incertae sedis     | CBS 121739    | Gp0072276      | JGI              | 245627          | biocontrol (mycoparasite of rust)                           | 35.44             | 86.30    | 408          | 122            | 11232   |                | illumina              |
| Cercospora canescens                  | Ascomycota | Peziomycotina  | Dothideomycetes | Dothideomycetidae | Capnodiales      | Mycosphaerellaceae | BHU           | Gp0037543      | ANSM01           | 183604          | plant pathogen (leaf spot of various bean crops and tomato) | 33.96             | 12.00    | 8239         |                | 52      | illumina       |                       |
| Cercospora canescens                  | Ascomycota | Peziomycotina  | Dothideomycetes | Dothideomycetidae | Capnodiales      | Mycosphaerellaceae | BHU           | Gp0037543      | ANSM01           | 183604          | plant pathogen (leaf spot of various bean crops and tomato) | 33.96             | 12.00    | 8239         |                | 52      | illumina       |                       |
| Cercospora zaeae-maydis               | Ascomycota | Peziomycotina  | Dothideomycetes | Dothideomycetidae | Capnodiales      | Mycosphaerellaceae | SC01          | Gp0002172      | JGI              | 68833           | plant pathogen (maize); toxin-producing                     | 46.61             | 39.29    | 2555         | 917            | 12020   |                |                       |
| Cercospora zaeae-maydis               | Ascomycota | Peziomycotina  | Dothideomycetes | Dothideomycetidae | Capnodiales      | Mycosphaerellaceae | SC01          | Gp0002172      | JGI              | 68833           | plant pathogen (maize); toxin-producing                     | 46.61             | 39.29    | 2555         | 917            | 12020   |                |                       |
| Lecanosticta acicola                  | Ascomycota | Peziomycotina  | Dothideomycetes | Dothideomycetidae | Capnodiales      | Mycosphaerellaceae | CBS 871.95    | Gp0047147      | AWYC01           | 212329          | plant pathogen (pine)                                       | 34.873            | 295.00   | 4114         | 2052           |         | 48.7           | illumina HiSeq        |
| Lecanosticta acicola                  | Ascomycota | Peziomycotina  | Dothideomycetes | Dothideomycetidae | Capnodiales      | Mycosphaerellaceae | CBS 871.95    | Gp0047147      | AWYC01           | 212329          | plant pathogen (pine)                                       | 34.873            | 295.00   | 4114         | 2052           |         | 48.7           | illumina HiSeq        |
| Mycosphaerella arachidis (Cercospora) | Ascomycota | Peziomycotina  | Dothideomycetes | Dothideomycetidae | Capnodiales      | Mycosphaerellaceae | CALF-13A      | Gp0150604      | LIH801           | 291633          | plant pathogen (leaf spot on peanuts)                       | 33.24             | 100.00   | 796          | 491            | 52.4    |                |                       |
| Mycosphaerella eumusae                | Ascomycota | Peziomycotina  | Dothideomycetes | Dothideomycetidae | Capnodiales      | Mycosphaerellaceae | CBS 114824    | Gp0143045      | LFZN01           | 289096          | plant pathogen (banana)                                     | 47.12             | 165      | 2944         | 2626           | 12632   | 47.9           | illumina HiSeq        |
| Mycosphaerella eumusae                | Ascomycota | Peziomycotina  | Dothideomycetes | Dothideomycetidae | Capnodiales      | Mycosphaerellaceae | CBS 114824    | Gp0143045      | LFZN01           | 289096          | plant pathogen (banana)                                     | 47.12             | 165.00   | 2944         | 2626           | 12632   | 47.9           | illumina HiSeq        |
| Mycosphaerella fijiensis              | Ascomycota | Peziomycotina  | Dothideomycetes | Dothideomycetidae | Capnodiales      | Mycosphaerellaceae | CIRAD86       | Gp0002650      | JGI              | 19049           | plant pathogen (leaf spot of banana)                        | 74.14             | 7.11     | 778          | 56             | 13107   | 45.2           | Sanger                |
| Mycosphaerella fijiensis              | Ascomycota | Peziomycotina  | Dothideomycetes | Dothideomycetidae | Capnodiales      | Mycosphaerellaceae | CIRAD86       | Gp0002650      | JGI              | 19049           | plant pathogen (leaf spot of banana)                        | 74.14             | 7.11     | 778          | 56             | 13107   | 45.2           | Sanger                |
| Mycosphaerella laricina               | Ascomycota | Peziomycotina  | Dothideomycetes | Dothideomycetidae | Capnodiales      | Mycosphaerellaceae | CBS 326.52    | Gp0047149      | AWYE01           | 212505          | plant pathogen (larch)                                      | 25.598            | 527.00   | 1307         | 642            |         | 52.5           | illumina HiSeq        |
| Mycosphaerella laricina               | Ascomycota | Peziomycotina  | Dothideomycetes | Dothideomycetidae | Capnodiales      | Mycosphaerellaceae | CBS 326.52    | Gp0047149      | AWYE01           | 212505          | plant pathogen (larch)                                      | 25.598            | 527.00   | 1307         | 642            |         | 52.5           | illumina HiSeq        |
| Mycosphaerella pini                   | Ascomycota | Peziomycotina  | Dothideomycetes | Dothideomycetidae | Capnodiales      | Mycosphaerellaceae | NZE10         | Gp0017021      | AIEN01           | 74753           | plant pathogen (pine)                                       | 30.21             | 34.28    | 264          | 20             | 12580   | 53.1           | Sanger; 454; illumina |
| Mycosphaerella pini                   | Ascomycota | Peziomycotina  | Dothideomycetes | Dothideomycetidae | Capnodiales      | Mycosphaerellaceae | NZE10         | Gp0017021      | AIEN01           | 74753           | plant pathogen (pine)                                       | 30.21             | 34.28    | 264          | 20             | 12580   | 53.1           | Sanger; 454; illumina |
| Mycosphaerella sp. Ston1              | Ascomycota | Peziomycotina  | Dothideomycetes | Dothideomycetidae | Capnodiales      | Mycosphaerellaceae | STON1         | Gp0045163      | AWYF01           | 212506          | poplar-associated                                           | 27.509            | 491.00   | 3346         | 1929           |         | 51.2           | illumina HiSeq        |
| Mycosphaerella sp. Ston1              | Ascomycota | Peziomycotina  | Dothideomycetes | Dothideomycetidae | Capnodiales      | Mycosphaerellaceae | STON1         | Gp0045163      | AWYF01           | 212506          | poplar-associated                                           | 27.509            | 491.00   | 3346         | 1929           |         | 51.2           | illumina HiSeq        |
| Passalora (Cladosporium) fulva        | Ascomycota | Peziomycotina  | Dothideomycetes | Dothideomycetidae | Capnodiales      | Mycosphaerellaceae | CBS 131901    | Gp0039398      | AMRR01           | 86753           | plant pathogen (tomato)                                     | 61.1              | 21.00    | 5714         | 4864           |         | 48.8           | 454                   |
| Pseudocercospora musae                | Ascomycota | Peziomycotina  | Dothideomycetes | Dothideomycetidae | Capnodiales      | Mycosphaerellaceae | CBS 116634    | Gp0143044      | LFZO01           | 289098          | plant pathogen (banana)                                     | 60.44             | 112      | 3640         | 3331           | 13129   | 44             | illumina HiSeq        |
| Pseudocercospora musae                | Ascomycota | Peziomycotina  | Dothideomycetes | Dothideomycetidae | Capnodiales      | Mycosphaerellaceae | CBS 116634    | Gp0143044      | LFZO01           | 289098          | plant pathogen (banana)                                     | 60.44             | 112      | 3640         | 3331           | 13129   | 44             | illumina HiSeq        |
| Pseudocercospora pini-densiflorae     | Ascomycota | Peziomycotina  | Dothideomycetes | Dothideomycetidae | Capnodiales      | Mycosphaerellaceae | CBS 125139    | Gp0047148      | AWYD01           | 212512          | animal pathogen (bats)                                      | 45,171            | 304.00   | 7359         | 5537           |         | 48.5</         |                       |

|                            |            |                 |                 |                    |                |                      |                 |                |          |               |                                                         |        |          |       |           |          |                     |
|----------------------------|------------|-----------------|-----------------|--------------------|----------------|----------------------|-----------------|----------------|----------|---------------|---------------------------------------------------------|--------|----------|-------|-----------|----------|---------------------|
| Eremomyces bilateralis     | Ascomycota | Peizozymocotina | Dothideomycetes | Incertae sedis     | Incertae sedis | Eremomycetaceae      | CBS 781.70      | Gp0033623      | 1011349  | 217190        | uncertain                                               | 26,86  | 91,10    | 321   | 95        | 9881     | illumina HiSeq      |
| Cryomyces antarcticus      | Ascomycota | Peizozymocotina | Dothideomycetes | Incertae sedis     | Incertae sedis | Incertae sedis       | CCFEE 534       | Gp0076232      | AYQD01   | 222806        | rock-inhabiting; stress-tolerant                        | 24,32  | 108,00   | 12491 |           |          | 53,9 Ion Torrent    |
| Cryomyces antarcticus      | Ascomycota | Peizozymocotina | Dothideomycetes | Incertae sedis     | Incertae sedis | Incertae sedis       | CCFEE 534       | Gp0076232      | AYQD01   | 222806        | rock-inhabiting; stress-tolerant                        | 24,32  | 108,00   | 12491 |           |          | 53,9 Ion Torrent    |
| Peltaster fructicola       | Ascomycota | Peizozymocotina | Dothideomycetes | Incertae sedis     | Incertae sedis | Incertae sedis       | LNHT1506        | Gp0143846      | LJA001   | 293964        | plant pathogen (apples)                                 | 19,02  | 253      | 16    | 14        |          | 51,9                |
| Peltaster fructicola       | Ascomycota | Peizozymocotina | Dothideomycetes | Incertae sedis     | Incertae sedis | Incertae sedis       | LNHT1506        | Gp0143846      | LJA001   | 293964        | plant pathogen (apples)                                 | 19,02  | 253      | 16    | 14        |          | 51,9                |
| Lizonia emprigonia         | Ascomycota | Peizozymocotina | Dothideomycetes | Incertae sedis     | Incertae sedis | Pseudoperisporiaceae | CBS 542.76 v1.0 | Gp0036392      | 1019757  | 245629        | uncertain                                               | 51,52  | 21,6     | 423   | 423       | 12467    | PacBio              |
| Lizonia emprigonia         | Ascomycota | Peizozymocotina | Dothideomycetes | Incertae sedis     | Incertae sedis | Pseudoperisporiaceae | CBS 542.76 v1.0 | Gp0036392      | 1019757  | 245629        | uncertain                                               | 51,52  | 21,6     | 423   | 423       | 12467    | PacBio              |
| Microthyrium microscopicum | Ascomycota | Peizozymocotina | Dothideomycetes | Incertae sedis     | Microthyriales | Microthyriaceae      | CBS 115976      | Gp0033175      | 1011369  | 234668        | saprotroph                                              | 37,12  | 72,9     | 265   | 58        | 12494    | illumina HiSeq      |
| Microthyrium microscopicum | Ascomycota | Peizozymocotina | Dothideomycetes | Incertae sedis     | Microthyriales | Microthyriaceae      | CBS 115976      | Gp0033175      | 1011369  | 234668        | saprotroph                                              | 37,12  | 72,9     | 265   | 58        | 12494    | illumina HiSeq      |
| Myriangium duriae          | Ascomycota | Peizozymocotina | Dothideomycetes | Dothideomycetidae  | Myriangiiales  | Myriangiaceae        | CBS 260.36      | Gp0019337      | JGI      | 196043        | parasite (insect)                                       | 25,69  | 97,70    | 32    | 16        | 10685    | illumina HiSeq      |
| Myriangium duriae          | Ascomycota | Peizozymocotina | Dothideomycetes | Dothideomycetidae  | Myriangiiales  | Myriangiaceae        | CBS 260.36      | Gp0019337      | JGI      | 196043        | parasite (insect)                                       | 25,69  | 97,70    | 32    | 16        | 10685    | illumina HiSeq      |
| Cenococcum geophilum       | Ascomycota | Peizozymocotina | Dothideomycetes | Pleosporomycetidae | Mytilinidiales | Gloniaceae           |                 | 1,58 Gp0006117 | JGI      | 196023        | ectomycorrhizal                                         | 177,57 | 75       | 2893  | 268       | 27529    | illumina HiSeq      |
| Cenococcum geophilum       | Ascomycota | Peizozymocotina | Dothideomycetes | Pleosporomycetidae | Mytilinidiales | Gloniaceae           |                 | 1,58 Gp0006117 | JGI      | 196023        | ectomycorrhizal                                         | 177,57 | 75,00    | 2893  | 268       | 27529    | illumina HiSeq      |
| Lophium mytilinum          | Ascomycota | Peizozymocotina | Dothideomycetes | Pleosporomycetidae | Mytilinidiales | Mytiliniaceae        | CBS 269.34      | Gp0036355      | JGI      | 234407        | uncertain                                               | 43,41  | 74,4     | 286   | 49        | 15153    | illumina HiSeq      |
| Lophium mytilinum          | Ascomycota | Peizozymocotina | Dothideomycetes | Pleosporomycetidae | Mytilinidiales | Mytiliniaceae        | CBS 269.34      | Gp0036355      | JGI      | 234407        | uncertain                                               | 43,41  | 74,40    | 286   | 49        | 15153    | illumina HiSeq      |
| Patellaria atrata          | Ascomycota | Peizozymocotina | Dothideomycetes | Incertae sedis     | Patellariales  | Patellariaceae       | CBS 101060      | Gp0019408      | JGI      | 208393        | saprotroph                                              | 28,69  | 192,4    | 501   | 127       | 9794     | illumina HiSeq      |
| Patellaria atrata          | Ascomycota | Peizozymocotina | Dothideomycetes | Incertae sedis     | Patellariales  | Patellariaceae       | CBS 101060      | Gp0019408      | JGI      | 208393        | saprotroph                                              | 28,69  | 192,4    | 501   | 127       | 9794     | illumina HiSeq      |
| Rhizodiscina lignyota      | Ascomycota | Peizozymocotina | Dothideomycetes | Incertae sedis     | Patellariales  | Patellariaceae       | CBS 133067      | Gp0036565      | 1019729  | 263052        | mycobiont (lichen-forming)                              | 33,43  | 95,90    | 43    | 33        | 12801    | illumina HiSeq      |
| Rhizodiscina lignyota      | Ascomycota | Peizozymocotina | Dothideomycetes | Incertae sedis     | Patellariales  | Patellariaceae       | CBS 133067      | Gp0036565      | 1019729  | 263052        | mycobiont (lichen-forming)                              | 33,43  | 95,90    | 43    | 33        | 12801    | illumina HiSeq      |
| Rhytidhysterion rufulum    | Ascomycota | Peizozymocotina | Dothideomycetes | Patellariales      | Patellariales  | Patellariaceae       | CBS 306.38      | Gp0038493      | AJFL01   | 81799         | saprotroph (mainly); occasionally plant pathogen        | 40,18  | 109,00   | 4455  | 3308      | 12117    | 47,9 illumina GAI   |
| Rhytidhysterion rufulum    | Ascomycota | Peizozymocotina | Dothideomycetes | Patellariales      | Patellariales  | Patellariaceae       | CBS 306.38      | Gp0038493      | AJFL01   | 81799         | saprotroph (mainly); occasionally plant pathogen        | 40,18  | 109      | 4455  | 3308      | 12117    | 47,9 illumina GAI   |
| Amniculicola lignicola     | Ascomycota | Peizozymocotina | Dothideomycetes | Dothideomycetidae  | Pleosporales   | Amniculicolaceae     | CBS 123094      | Gp0033118      | JGI      | 217192        | saprotroph                                              | 49,58  | 99       | 1274  | 510       | 15590    | illumina HiSeq      |
| Amniculicola lignicola     | Ascomycota | Peizozymocotina | Dothideomycetes | Dothideomycetidae  | Pleosporales   | Amniculicolaceae     | CBS 123094      | Gp0033118      | JGI      | 217192        | saprotroph                                              | 49,58  | 99,00    | 1274  | 510       | 15590    | illumina HiSeq      |
| Nigrograna mackinnonii     | Ascomycota | Peizozymocotina | Dothideomycetes | Pleosporomycetidae | Pleosporales   | Biatriosporaceae     | E5202H          | Gp0039092      | JGVQ01   | 187080        | endophyte (root)                                        | 51,71  | 272      | 425   |           |          | 47,9 illumina HiSeq |
| Nigrograna mackinnonii     | Ascomycota | Peizozymocotina | Dothideomycetes | Pleosporomycetidae | Pleosporales   | Biatriosporaceae     | E5202H          | Gp0039092      | JGVQ01   | 187080        | endophyte (root)                                        | 51,71  | 272      | 425   |           |          | 47,9 illumina HiSeq |
| Corynespora cassicola      | Ascomycota | Peizozymocotina | Dothideomycetes | Dothideomycetidae  | Pleosporales   | Corynesporaceae      | UM 591          | Gp0086748      | JAQF01   | 250634        | plant pathogen (broad host range)                       | 41,385 | 118,00   | 1941  |           | 17166    | 52,5 illumina HiSeq |
| Corynespora cassicola      | Ascomycota | Peizozymocotina | Dothideomycetes | Dothideomycetidae  | Pleosporales   | Corynesporaceae      | UM 591          | Gp0086748      | JAQF01   | 250634        | plant pathogen (broad host range)                       | 41,385 | 118      | 1941  |           | 17166    | 52,5 illumina HiSeq |
| Cucurbitaria berberidis    | Ascomycota | Peizozymocotina | Dothideomycetes | Dothideomycetidae  | Pleosporales   | Cucurbitariaceae     | CBS 394.84      | Gp0019330      | JGI      | 196042        | saprotroph                                              | 32,91  | 145,7    | 184   | 42        | 12439    | illumina HiSeq      |
| Cucurbitaria berberidis    | Ascomycota | Peizozymocotina | Dothideomycetes | Dothideomycetidae  | Pleosporales   | Cucurbitariaceae     | CBS 394.84      | Gp0019330      | JGI      | 196042        | saprotroph                                              | 32,91  | 145,7    | 184   | 42        | 12439    | illumina HiSeq      |
| Delitschia confertaspura   | Ascomycota | Peizozymocotina | Dothideomycetes | Dothideomycetidae  | Pleosporales   | Delitschiaceae       | ATCC 74209      | Gp0039185      | JGI      | 251766        | coprophilous                                            | 31,16  | 74,9     | 822   | 764       | 10171    | illumina HiSeq      |
| Delitschia confertaspura   | Ascomycota | Peizozymocotina | Dothideomycetes | Dothideomycetidae  | Pleosporales   | Delitschiaceae       | ATCC 74209      | Gp0039185      | JGI      | 251766        | coprophilous                                            | 31,16  | 74,9     | 822   | 764       | 10171    | illumina HiSeq      |
| Clathrospora elynae        | Ascomycota | Peizozymocotina | Dothideomycetes | Dothideomycetidae  | Pleosporales   | Diademaceae          | CBS 161.51      | Gp0036331      | JGI      | 245624        | uncertain                                               | 37,39  | 80,8     | 1994  | 617       | 13617    | illumina HiSeq      |
| Clathrospora elynae        | Ascomycota | Peizozymocotina | Dothideomycetes | Dothideomycetidae  | Pleosporales   | Diademaceae          | CBS 161.51      | Gp0036331      | JGI      | 245624        | uncertain                                               | 37,39  | 80,8     | 1994  | 617       | 13617    | illumina HiSeq      |
| Clathrospora elynae        | Ascomycota | Peizozymocotina | Dothideomycetes | Dothideomycetidae  | Pleosporales   | Diademaceae          | CBS 161.51      | Gp0036331      | JGI      | 245624        | uncertain                                               | 37,39  | 80,8     | 1994  | 617       | 13617    | illumina HiSeq      |
| Ascochyta rabiei           | Ascomycota | Peizozymocotina | Dothideomycetes | Dothideomycetidae  | Pleosporales   | Didymellaceae        | ArDII           | Gp0150874      | JYNV01   | 272665        | plant pathogen (blight on chickpea)                     | 34,66  | 178      | 932   | 338       | 10596    | 50,7 illumina       |
| Ascochyta rabiei           | Ascomycota | Peizozymocotina | Dothideomycetes | Dothideomycetidae  | Pleosporales   | Didymellaceae        | ArDII           | Gp0150874      | JYNV01   | 272665        | plant pathogen (blight on chickpea)                     | 34,66  | 178      | 932   | 338       | 10596    | 50,7 illumina       |
| Didymella exigua           | Ascomycota | Peizozymocotina | Dothideomycetes | Pleosporomycetidae | Pleosporales   | Didymellaceae        | CBS 183.55      | Gp0019438      | JGI      | 207857        | saprotroph                                              | 34,39  | 82,1     | 1010  | 176       | 12394    | illumina            |
| Didymella exigua           | Ascomycota | Peizozymocotina | Dothideomycetes | Pleosporomycetidae | Pleosporales   | Didymellaceae        | CBS 183.55      | Gp0019438      | JGI      | 207857        | saprotroph                                              | 34,39  | 82,1     | 1010  | 176       | 12394    | illumina            |
| Macroventuria anomochaeta  | Ascomycota | Peizozymocotina | Dothideomycetes | Pleosporomycetidae | Pleosporales   | Didymellaceae        | CBS 525.71      | Gp0036390      | JGI      | 234398        | saprotroph                                              | 33,34  | 116,6    | 346   | 75        | 12954    | illumina HiSeq      |
| Macroventuria anomochaeta  | Ascomycota | Peizozymocotina | Dothideomycetes | Pleosporomycetidae | Pleosporales   | Didymellaceae        | CBS 525.71      | Gp0036390      | JGI      | 234398        | saprotroph                                              | 33,34  | 116,6    | 346   | 75        | 12954    | illumina HiSeq      |
| Macroventuria anomochaeta  | Ascomycota | Peizozymocotina | Dothideomycetes | Pleosporomycetidae | Pleosporales   | Didymellaceae        | CBS 525.71      | Gp0036390      | JGI      | 234398        | saprotroph                                              | 33,34  | 116,6    | 346   | 75        | 12954    | illumina HiSeq      |
| Phoma herbarum             | Ascomycota | Peizozymocotina | Dothideomycetes | Pleosporomycetidae | Pleosporales   | Didymellaceae        | JCM 15942       | Gp0144010      | BCGR01   | 313796        | plant pathogen (hop & hemp)                             | 39,26  | 462      |       |           |          | 51,7 HiSeq 2500     |
| Phoma herbarum             | Ascomycota | Peizozymocotina | Dothideomycetes | Pleosporomycetidae | Pleosporales   | Didymellaceae        | JCM 15942       | Gp0144010      | BCGR01   | 313796        | plant pathogen (hop & hemp)                             | 39,26  | 462      |       |           |          | 51,7 HiSeq 2500     |
| Phoma herbarum             | Ascomycota | Peizozymocotina | Dothideomycetes | Pleosporomycetidae | Pleosporales   | Didymellaceae        | JCM 15942       | Gp0144010      | BCGR01   | 313796        | plant pathogen (hop & hemp)                             | 39,26  | 462      |       |           |          | 51,7 HiSeq 2500     |
| Stagonosporopsis tanacetii | Ascomycota | Peizozymocotina | Dothideomycetes | Pleosporomycetidae | Pleosporales   | Didymellaceae        | Pooled DNA      | Gp0146030      | JUDZ01   | 268685        | plant pathogen (Asteraceae)                             | 40,1   | 140      | 9716  |           |          | 52,3 illumina       |
| Stagonosporopsis tanacetii | Ascomycota | Peizozymocotina | Dothideomycetes | Pleosporomycetidae | Pleosporales   | Didymellaceae        | Pooled DNA      | Gp0146030      | JUDZ01   | 268685        | plant pathogen (Asteraceae)                             | 40,1   | 140      | 9716  |           |          | 52,3 illumina       |
| Karstenula rhodostoma      | Ascomycota | Peizozymocotina | Dothideomycetes | Pleosporomycetidae | Pleosporales   | Didymosphaeriaceae   | CBS 690.94      | Gp0036420      | JGI      | 217209        | saprotroph                                              | 45,07  | 121      | 498   | 139       | 15043    | illumina HiSeq      |
| Karstenula rhodostoma      | Ascomycota | Peizozymocotina | Dothideomycetes | Pleosporomycetidae | Pleosporales   | Didymosphaeriaceae   | CBS 690.94      | Gp0036420      | JGI      | 217209        | saprotroph                                              | 45,07  | 121,00   | 498   | 139       | 15043    | illumina HiSeq      |
| Verruculina enalia         | Ascomycota | Peizozymocotina | Dothideomycetes | Pleosporomycetidae | Pleosporales   | Didymosphaeriaceae   | CBS 304.66      | Gp0036357      | JGI      | 239483        | marine fungus; mangrove-associated                      | 61,21  | 81,2     | 1600  | 611       | 13748    | illumina HiSeq      |
| Verruculina enalia         | Ascomycota | Peizozymocotina | Dothideomycetes | Pleosporomycetidae | Pleosporales   | Didymosphaeriaceae   | CBS 304.66      | Gp0036357      | JGI      | 239483        | marine fungus; mangrove-associated                      | 61,21  | 81,20    | 1600  | 611       | 13748    | illumina HiSeq      |
| Dothidotthia symphoricarpi | Ascomycota | Peizozymocotina | Dothideomycetes | Pleosporomycetidae | Pleosporales   | Dothidotthiaceae     | CBS 119687      | Gp0033174      | JGI      | 217191        | saprotroph                                              | 34,43  | 93,4     | 268   | 59        | 11790    | illumina HiSeq      |
| Dothidotthia symphoricarpi | Ascomycota | Peizozymocotina | Dothideomycetes | Pleosporomycetidae | Pleosporales   | Dothidotthiaceae     | CBS 119687      | Gp0033174      | JGI      | 217191        | saprotroph                                              | 34,43  | 93,40    | 268   | 59        | 11790    | illumina HiSeq      |
| Lineolata rhizophorae      | Ascomycota | Peizozymocotina | Dothideomycetes | Pleosporomycetidae | Pleosporales   | Fenestellaceae       | ATCC 16933 v1.0 |                | 1051209  | marine fungus | 31,14                                                   | 97,8   | 426      | 68    | 10230     | illumina |                     |
| Aaosphaeria arxii          | Ascomycota | Peizozymocotina | Dothideomycetes | Pleosporomycetidae | Pleosporales   | Incertae sedis       | CBS 175.79      | Gp0036559      | JGI      | 234399        | uncertain                                               | 38,9   | 86,5     | 176   | 55        | 14203    | illumina HiSeq      |
| Aaosphaeria arxii          | Ascomycota | Peizozymocotina | Dothideomycetes | Pleosporomycetidae | Pleosporales   | Incertae sedis       | CBS 175.79      | Gp0036559      | JGI      | 234399        | uncertain                                               | 38,9   | 86,50    | 176   | 55        | 14203    | illumina HiSeq      |
| Periconia macrospinosae    | Ascomycota | Peizozymocotina | Dothideomycetes | Pleosporomycetidae | Pleosporales   | Incertae sedis       | DSE2036         | Gp0046570      | 1025594  | 243955        | endophyte (root)                                        | 54,99  | 139,40   | 2470  | 1566      | 18750    | illumina HiSeq      |
| Trinosporium guianense     | Ascomycota | Peizozymocotina | Dothideomycetes | Pleosporomycetidae | Pleosporales   | Incertae sedis       | CBS132537       | Gp0095856      | 1040180  | 255619        | uncertain; environmental contaminant                    | 24,23  | 140,90   | 298   | 23600,00% | 8062     | illumina HiSeq      |
| Lentithecium fluviatile    | Ascomycota | Peizozymocotina | Dothideomycetes | Pleosporomycetidae | Pleosporales   | Lentitheciaceae      | CBS 122367      | Gp0019312      | JGI      | 196040        | saprotroph (freshwater)                                 | 54,69  | 85,4     | 2078  | 195       | 16742    | illumina HiSeq      |
| Lentithecium fluviatile    | Ascomycota | Peizozymocotina | Dothideomycetes | Pleosporomycetidae | Pleosporales   | Lentitheciaceae      | CBS 122367      | Gp0019312      | JGI      | 196040        | saprotroph (freshwater)                                 | 54,69  | 85,40    | 2078  | 195       | 16742    | illumina HiSeq      |
| Leptosphaeria maculans     | Ascomycota | Peizozymocotina | Dothideomycetes | Pleosporomycetidae | Pleosporales   | Leptosphaeriaceae    | JN3             | Gp0010336      | ASM23037 | 63129         | plant pathogen (Brassica crops)                         | 45,124 |          | 76    |           | 12469    | 45,3                |
| Leptosphaeria maculans     | Ascomycota | Peizozymocotina | Dothideomycetes | Pleosporomycetidae | Pleosporales   | Leptosphaeriaceae    | JN3             | Gp0010336      | ASM23037 | 63129         | plant pathogen (Brassica crops)                         | 45,124 |          | 76    |           | 12469    | 45,3                |
| Ophiobolus disseminans     | Ascomycota | Peizozymocotina | Dothideomycetes | Pleosporomycetidae | Pleosporales   | Leptosphaeriaceae    | CBS 113818      | Gp0036265      | JGI      | 239491        | uncertain; isolated from poisonous Mercurialis perennis | 41,68  | 97,1     | 408   | 72        | 16027    | illumina HiSeq      |
| Ophiobolus disseminans     | Ascomycota | Peizozymocotina | Dothideomycetes | Pleosporomycetidae | Pleosporales   | Leptosphaeriaceae    | CBS 113818      | Gp0036265      | JGI      | 239491        | uncertain; isolated from poisonous Mercurialis perennis | 41,68  | 97,10    | 408   | 72        | 16027    | illumina HiSeq      |
| Plenodomus tracheiphilus   | Ascomycota | Peizozymocotina | Dothideomycetes | Pleosporomycetidae | Pleosporales   | Leptosphaeriaceae    | IPT5            | Gp0039845      | JGI      | 223133        | plant pathogen (citrus)                                 | 34,24  | 98,6     | 431   | 273       | 13209    | illumina HiSeq      |
| Plenodomus tracheiphilus   | Ascomycota | Peizozymocotina | Dothideomycetes | Pleosporomycetidae | Pleosporales   | Leptosphaeriaceae    | IPT5            | Gp0039845      | JGI      | 223133        | plant pathogen (citrus)                                 | 34,24  | 98,6     | 431   | 273       | 13209    | illumina HiSeq      |
| Lophiostoma macrostomum    | Ascomycota | Peizozymocotina | Dothideomycetes | Pleosporomycetidae | Pleosporales   | Lophiostomataceae    | CBS 122681      | Gp0033112      | JGI      | 196073        | saprotroph                                              | 42,58  | 140,3    | 1294  | 1282      | 16160    | illumina HiSeq      |
| Lophiostoma macrostomum    | Ascomycota | Peizozymocotina | Dothideomycetes | Pleosporomycetidae | Pleosporales   | Lophiostomataceae    | CBS 122681      | Gp0033112      | JGI      | 196073        | saprotroph                                              | 42,58  | 140,30</ |       |           |          |                     |

|                               |            |                |                 |                      |                 |                     |                 |                  |         |                                                                                    |         |        |       |      |       |                            |
|-------------------------------|------------|----------------|-----------------|----------------------|-----------------|---------------------|-----------------|------------------|---------|------------------------------------------------------------------------------------|---------|--------|-------|------|-------|----------------------------|
| Decorspora gaudefroyi         | Ascomycota | Peizozymcotina | Dothideomycetes | Dothideomycetidae    | Pleosporales    | Pleosporaceae       | CBS 332.63      |                  | 1032355 | marine saprotroph                                                                  | 30,56   | 152,6  | 879   | 699  | 11835 | llumina                    |
| Decorspora gaudefroyi         | Ascomycota | Peizozymcotina | Dothideomycetes | Dothideomycetidae    | Pleosporales    | Pleosporaceae       | CBS 332.63      |                  | 1032355 | marine saprotroph                                                                  | 30,56   | 152,60 | 879   | 699  | 11835 | llumina                    |
| Pyrenochaeta lycopersici      | Ascomycota | Peizozymcotina | Dothideomycetes | Pleosporomycetidae   | Pleospinales    | Pleosporaceae       | CRA-PAV_ER 1211 | Gp0090025        | ASRS01  | 202288 plant pathogen (tomato)                                                     | 50,489  | 300,00 | 12392 | 7018 |       | 47,7 illumina GAltx        |
| Pyrenochaeta lycopersici      | Ascomycota | Peizozymcotina | Dothideomycetes | Pleosporomycetidae   | Pleospinales    | Pleosporaceae       | CRA-PAV_ER 1211 | Gp0090025        | ASRS01  | 202288 plant pathogen (tomato)                                                     | 50,489  | 300,00 | 12392 | 7018 |       | 47,7 illumina GAltx        |
| Pyrenochaeta sp. DS3sAY3a     | Ascomycota | Peizozymcotina | Dothideomycetes | Pleosporomycetidae   | Pleospinales    | Pleosporaceae       | DS3sAY3a        | Gp0050683        | JGI     | 255591 Mn(II)-oxidizing; mineral cycling                                           | 38,5    | 86,7   | 209   | 69   | 14995 | llumina HiSeq              |
| Pyrenochaeta sp. DS3sAY3a     | Ascomycota | Peizozymcotina | Dothideomycetes | Pleosporomycetidae   | Pleospinales    | Pleosporaceae       | DS3sAY3a        | Gp0050683        | JGI     | 255591 Mn(II)-oxidizing; mineral cycling                                           | 38,5    | 86,70  | 209   | 69   | 14995 | llumina HiSeq              |
| Pyrenochaeta sp. UM 256       | Ascomycota | Peizozymcotina | Dothideomycetes | Pleosporomycetidae   | Pleospinales    | Pleosporaceae       | UM 256          | Gp0039028        | AQUM01  | 189754 human pathogen                                                              | 35,484  | 27,00  | 286   | 254  |       | 50,4                       |
| Pyrenochaeta sp. UM 256       | Ascomycota | Peizozymcotina | Dothideomycetes | Pleosporomycetidae   | Pleospinales    | Pleosporaceae       | UM 256          | Gp0039028        | AQUM01  | 189754 human pathogen                                                              | 35,484  | 27,00  | 286   | 254  |       | 50,4                       |
| Pyrenophora seminiperda       | Ascomycota | Peizozymcotina | Dothideomycetes | Pleosporomycetidae   | Pleospinales    | Pleosporaceae       | CCB06           | Gp0037221        | ATLS01  | 192591 plant pathogen (necrotrophic; seeds of grasses/cereals)                     | 32,539  | 17,00  | 660   | 54   |       | 49,8                       |
| Pyrenophora seminiperda       | Ascomycota | Peizozymcotina | Dothideomycetes | Pleosporomycetidae   | Pleospinales    | Pleosporaceae       | CCB06           | Gp0037221        | ATLS01  | 192591 plant pathogen (necrotrophic; seeds of grasses/cereals)                     | 32,539  | 17,00  | 660   | 54   |       | 49,8                       |
| Pyrenophora teres             | Ascomycota | Peizozymcotina | Dothideomycetes | Pleosporomycetidae   | Pleospinales    | Pleosporaceae       | 0-1             | Gp0008318        | AEEY01  | 50389 plant pathogen (barley and some other crops)                                 | 33,583  | 20,00  | 6684  | 6412 | 11799 | 50,9 illumina              |
| Pyrenophora teres             | Ascomycota | Peizozymcotina | Dothideomycetes | Pleosporomycetidae   | Pleospinales    | Pleosporaceae       | 0-1             | Gp0008318        | AEEY01  | 50389 plant pathogen (barley and some other crops)                                 | 33,583  | 20,00  | 6684  | 6412 | 11799 | 50,9 illumina              |
| Pyrenophora tritici-repentis  | Ascomycota | Peizozymcotina | Dothideomycetes | Pleosporomycetidae   | Pleospinales    | Pleosporaceae       | Pt-1C-BFP       | Gp0003140        | AAXI01  | 18815 plant pathogen (cereals and grasses; necrotrophic)                           | 37,997  | 6,93   | 48    |      | 12300 | 51 Sanger                  |
| Pyrenophora tritici-repentis  | Ascomycota | Peizozymcotina | Dothideomycetes | Pleosporomycetidae   | Pleospinales    | Pleosporaceae       | Pt-1C-BFP       | Gp0003140        | AAXI01  | 18815 plant pathogen (cereals and grasses; necrotrophic)                           | 37,997  | 6,93   | 48    |      | 12300 | 51 Sanger                  |
| Setosphaeria turcica          | Ascomycota | Peizozymcotina | Dothideomycetes | Pleosporomycetidae   | Pleospinales    | Pleosporaceae       | E128A           | Gp0008856        | AIHT01  | 82947 plant pathogen (maize)                                                       | 43,01   | 58,10  | 1959  | 407  | 11702 | 51,4 454; Sanger; illumina |
| Setosphaeria turcica          | Ascomycota | Peizozymcotina | Dothideomycetes | Pleosporomycetidae   | Pleospinales    | Pleosporaceae       | E128A           | Gp0008856        | AIHT01  | 82947 plant pathogen (maize)                                                       | 43,01   | 58,10  | 1959  | 407  | 11702 | 51,4 454; Sanger; illumina |
| Stemphylium lycopersici       | Ascomycota | Peizozymcotina | Dothideomycetes | Pleosporomycetidae   | Pleospinales    | Pleosporaceae       | CIDEFI 216      | Gp0118324        | LGLR01  | 274742 plant pathogen (fruits)                                                     | 35,17   | 77,39  | 5130  | 414  | 8997  | 50,7 illumina HiSeq        |
| Stemphylium lycopersici       | Ascomycota | Peizozymcotina | Dothideomycetes | Pleosporomycetidae   | Pleospinales    | Pleosporaceae       | CIDEFI 216      | Gp0118324        | LGLR01  | 274742 plant pathogen (fruits)                                                     | 35,17   | 77,39  | 5130  | 414  | 8997  | 50,7 illumina HiSeq        |
| Shiraia sp. slf14             | Ascomycota | Peizozymcotina | Dothideomycetes | Pleosporomycetidae   | Pleospinales    | Pleosporales        | SH14            | Gp0071001        | AXZN01  | 222884 endophyte                                                                   | 32,067  | 55,00  | 288   |      |       | 48 illumina HiSeq          |
| Shiraia sp. slf14             | Ascomycota | Peizozymcotina | Dothideomycetes | Pleosporomycetidae   | Pleospinales    | Pleosporales        | SH14            | Gp0071001        | AXZN01  | 222884 endophyte                                                                   | 32,067  | 55,00  | 288   |      |       | 48 illumina HiSeq          |
| Sporormia fimetaria           | Ascomycota | Peizozymcotina | Dothideomycetes | Pleosporomycetidae   | Pleospinales    | Sporormiaceae       | CBS 119925      | Gp0033217        | JGI     | 205956 coprophilous                                                                | 25,89   | 104    | 293   | 140  | 10783 | llumina HiSeq              |
| Sporormia fimetaria           | Ascomycota | Peizozymcotina | Dothideomycetes | Pleosporomycetidae   | Pleospinales    | Sporormiaceae       | CBS 119925      | Gp0033217        | JGI     | 205956 coprophilous                                                                | 25,89   | 104    | 293   | 140  | 10783 | llumina HiSeq              |
| Westerdykella ornata          | Ascomycota | Peizozymcotina | Dothideomycetes | Pleosporomycetidae   | Pleospinales    | Sporormiaceae       | CBS 379.55      | Gp0036361        | JGI     | 245619 pharmaceutical importance (antibiotic-producing)                            | 26,98   | 162,1  | 180   | 94   | 10410 | llumina HiSeq              |
| Westerdykella ornata          | Ascomycota | Peizozymcotina | Dothideomycetes | Pleosporomycetidae   | Pleospinales    | Sporormiaceae       | CBS 379.55      | Gp0036361        | JGI     | 245619 pharmaceutical importance (antibiotic-producing)                            | 26,98   | 162,1  | 180   | 94   | 10410 | llumina HiSeq              |
| Polyposphaeria fusca          | Ascomycota | Peizozymcotina | Dothideomycetes | Pleosporomycetidae   | Pleospinales    | Tetraplophaeriaceae | CBS 125425      | Gp0036310        | JGI     | 245626 bambusicolous                                                               | 37,01   | 151    | 593   | 468  | 15194 | llumina HiSeq              |
| Polyposphaeria fusca          | Ascomycota | Peizozymcotina | Dothideomycetes | Pleosporomycetidae   | Pleospinales    | Tetraplophaeriaceae | CBS 125425      | Gp0036310        | JGI     | 245626 bambusicolous                                                               | 37,01   | 151    | 593   | 468  | 15194 | llumina HiSeq              |
| Trematosphaeria pertusa       | Ascomycota | Peizozymcotina | Dothideomycetes | Pleosporomycetidae   | Pleospinales    | Trematosphaeriaceae | CBS 122368      | Gp0036292        | JGI     | 234397 saprotroph (freshwater)                                                     | 47,75   | 96,4   | 675   | 101  | 17306 | llumina HiSeq              |
| Trematosphaeria pertusa       | Ascomycota | Peizozymcotina | Dothideomycetes | Pleosporomycetidae   | Pleospinales    | Trematosphaeriaceae | CBS 122368      | Gp0036292        | JGI     | 234397 saprotroph (freshwater)                                                     | 47,75   | 96,4   | 675   | 101  | 17306 | llumina HiSeq              |
| Pleospinales sp. UM 1110 2012 | Ascomycota | Peizozymcotina | Dothideomycetes | Pleosporomycetidae   | Pleospinales    | unknown             | UM 1110         | Gp0039009        | AJMS01  | 89471 uncertain                                                                    | 36,919  | 100,00 | 11436 |      |       | 51,4 illumina GAltx        |
| Pleospinales sp. UM 1110 2012 | Ascomycota | Peizozymcotina | Dothideomycetes | Pleosporomycetidae   | Pleospinales    | unknown             | UM 1110         | Gp0039009        | AJMS01  | 89471 uncertain                                                                    | 36,919  | 100    | 11436 |      |       | 51,4 illumina GAltx        |
| Zopfia rhizophila             | Ascomycota | Peizozymcotina | Dothideomycetes | Pleosporomycetidae   | Pleospinales    | Zopfiaceae          | CBS 207.26      | Gp0024306        | JGI     | 196051 opportunistic root rot                                                      | 152,78  | 95,5   | 1349  | 864  | 21730 | llumina HiSeq; PacBio      |
| Zopfia rhizophila             | Ascomycota | Peizozymcotina | Dothideomycetes | Pleosporomycetidae   | Pleospinales    | Zopfiaceae          | CBS 207.26      | Gp0024306        | JGI     | 196051 opportunistic root rot                                                      | 152,78  | 95,5   | 1349  | 864  | 21730 | llumina HiSeq; PacBio      |
| Lineolata rhizophorae         | Ascomycota | Peizozymcotina | Dothideomycetes | Pleosporomycetidae   | Pleospinales    | Fenestellaceae      | ATCC 16933 v1.0 |                  | 1051209 | marine fungus                                                                      | 31,14   | 97,8   | 426   | 68   | 10230 | llumina                    |
| Trypethelium eluteriae        | Ascomycota | Peizozymcotina | Dothideomycetes | Incertae sedis       | Trypetheliales  | Trypetheliaceae     | not specified   |                  | JGI     | mycobiont (lichen-forming)                                                         | 32,16   | 142,1  | 747   | 730  | 11858 | llumina                    |
| Trypethelium eluteriae        | Ascomycota | Peizozymcotina | Dothideomycetes | Incertae sedis       | Trypetheliales  | Trypetheliaceae     | not specified   |                  | JGI     | mycobiont (lichen-forming)                                                         | 32,16   | 142,10 | 747   | 730  | 11858 | llumina                    |
| Ochroconis constricta         | Ascomycota | Peizozymcotina | Dothideomycetes | Incertae sedis       | Venturiales     | Sympoventuriaceae   | UM 578          | Gp0076216        | AZYM01  | 232808 animal pathogen; opportunistic human pathogen                               | 34,434  | 87,00  | 544   |      |       | 52,1 illumina HiSeq        |
| Ochroconis constricta         | Ascomycota | Peizozymcotina | Dothideomycetes | Incertae sedis       | Venturiales     | Sympoventuriaceae   | UM 578          | Gp0076216        | AZYM01  | 232808 animal pathogen; opportunistic human pathogen                               | 34,434  | 87     | 544   |      |       | 52,1 illumina HiSeq        |
| Verruconis gallopava          | Ascomycota | Peizozymcotina | Dothideomycetes | Incertae sedis       | Venturiales     | Sympoventuriaceae   | CBS 43764       |                  | JYBX01  | 325802 medical importance (black yeast)                                            | 31,78   | 145    | 565   | 367  | 11357 | llumina                    |
| Tothia fuscella               | Ascomycota | Peizozymcotina | Dothideomycetes | Incertae sedis       | Venturiales     | Venturiaceae        | CBS 130266      | Gp0036563        |         | 245630 uncertain                                                                   | 36,78   | 146,8  | 687   | 363  | 13685 | llumina HiSeq              |
| Tothia fuscella               | Ascomycota | Peizozymcotina | Dothideomycetes | Incertae sedis       | Venturiales     | Venturiaceae        | CBS 130266      | Gp0036563        |         | 245630 uncertain                                                                   | 36,78   | 146,8  | 687   | 363  | 13685 | llumina HiSeq              |
| Venturia pyrina               | Ascomycota | Peizozymcotina | Dothideomycetes | Pleosporomycetidae   | Venturiales     | Venturiaceae        | ICMP 11032      | Gp0095335        | JEMPO1  | 232087 plant pathogen (hemibiotrophic; pear)                                       | 41,177  | 40,00  | 2308  |      |       | 47,6 illumina GAltx        |
| Venturia pyrina               | Ascomycota | Peizozymcotina | Dothideomycetes | Pleosporomycetidae   | Venturiales     | Venturiaceae        | ICMP 11032      | Gp0095335        | JEMPO1  | 232087 plant pathogen (hemibiotrophic; pear)                                       | 41,177  | 40     | 2308  |      |       | 47,6 illumina GAltx        |
| Hortaea acidophila            | Ascomycota | Peizozymcotina | Dothideomycetes | Dothideomycetidae    | Capnodiales     | Tetraplophaeriaceae | CBS 113389 v1.0 |                  | 1040525 | industrial importance (acid-tolerant black yeast)                                  | 20,43   | 100,7  | 59    | 39   | 9831  | llumina                    |
| Bimuria novae-zelandiae       | Ascomycota | Peizozymcotina | Dothideomycetes | Pleosporomycetidae   | Pleospinales    | Montagnulaceae      | CBS 107.79 v1.0 |                  | 1019717 | parasite; lichenicolous                                                            | 78,18   | 62,3   | 1338  | 321  | 16681 | llumina                    |
| Rhizodiscina lignyota         | Ascomycota | Peizozymcotina | Dothideomycetes | Incertae sedis       | Patellariales   | Patellariaceae      | CBS 133067      | Gp0036565        |         | 263052 mycobiont (lichen-forming)                                                  | 33,43   | 95,9   | 43    | 33   | 12801 | llumina HiSeq              |
| Ascosphaera apis              | Ascomycota | Peizozymcotina | Eurotiomycetes  | Ascosphaeriales      | Ascosphaerales  | Ascosphaeraceae     | USDA-ARSEF 7405 | Gp0002467        | AARE01  | 17285 animal pathogen (honey bees)                                                 | 21,5    | 4      | 6559  | 1667 |       | Sanger                     |
| Ascosphaera apis              | Ascomycota | Peizozymcotina | Eurotiomycetes  | Eurotiomycetidae     | Ascosphaerales  | Ascosphaeraceae     | USDA-ARSEF 7405 | Gp0002467        | AARE01  | 17285 animal pathogen (honey bees)                                                 | 21,5    | 4,00   | 6559  | 1667 |       | Sanger                     |
| Cyphellophora europaea        | Ascomycota | Peizozymcotina | Eurotiomycetes  | Chaetothiyomycetidae | Chaetothyriales | Cyphellophoraceae   | CBS 101466      |                  | A0BU01  | 172438 human pathogen (superficial infection); dermatiaceous                       | 28,7813 | 132,00 | 106   | 19   | 11153 | 54 illumina                |
| Cyphellophora europaea        | Ascomycota | Peizozymcotina | Eurotiomycetes  | Chaetothiyomycetidae | Chaetothyriales | Cyphellophoraceae   | CBS 101466      |                  | A0BU01  | 172438 human pathogen (superficial infection); dermatiaceous                       | 28,7813 | 132    | 106   | 19   | 11153 | 54 illumina                |
| Capronia coronata             | Ascomycota | Peizozymcotina | Eurotiomycetes  | Chaetothiyomycetidae | Chaetothyriales | Herpotrichiellaceae | CBS 617.96      | Gp0037646        | AMWN01  | 164585; Broad saprotroph; possible beetle associate; black yeast                   | 25,8    | 90,00  | 52    |      |       | 9231 52,8                  |
| Capronia coronata             | Ascomycota | Peizozymcotina | Eurotiomycetes  | Chaetothiyomycetidae | Chaetothyriales | Herpotrichiellaceae | CBS 617.96      | Gp0037646        | AMWN01  | 164585; Broad saprotroph; possible beetle associate; black yeast                   | 25,8    | 90     | 52    |      |       | 9231 52,8                  |
| Capronia epimyces             | Ascomycota | Peizozymcotina | Eurotiomycetes  | Chaetothiyomycetidae | Chaetothyriales | Herpotrichiellaceae | CBS 606.96      | Gp0037042; Broad | AMGY01  | 164587 uncertain; yeast (black)                                                    | 28,9    | 83,00  | 231   |      |       | 10469 53,4                 |
| Capronia epimyces             | Ascomycota | Peizozymcotina | Eurotiomycetes  | Chaetothiyomycetidae | Chaetothyriales | Herpotrichiellaceae | CBS 606.96      | Gp0037042; Broad | AMGY01  | 164587 uncertain; yeast (black)                                                    | 28,9    | 83     | 231   |      |       | 10469 53,4                 |
| Capronia semimmersa           | Ascomycota | Peizozymcotina | Eurotiomycetes  | Chaetothiyomycetidae | Chaetothyriales | Herpotrichiellaceae | CBS27337        | Gp0076064        | JYCC01  | 325795 medical importance (black yeast)                                            | 31,62   | 87     | 73    | 13   | 11909 | llumina                    |
| Cladophialophora bantiana     | Ascomycota | Peizozymcotina | Eurotiomycetes  | Chaetothiyomycetidae | Chaetothyriales | Herpotrichiellaceae | CBS 173.52      | Gp0076062        | JYBT01  | 233316 medical importance (black yeast)                                            | 36,72   | 122    | 140   | 60   | 12762 | llumina                    |
| Cladophialophora carrionii    | Ascomycota | Peizozymcotina | Eurotiomycetes  | Chaetothiyomycetidae | Chaetothyriales | Herpotrichiellaceae | CBS 160.54      | Gp0037643        | A0FF01  | 185784 human pathogen (chromoblastomycosis ); dermatiaceous                        | 28,99   | 80,00  | 102   | 19   | 10428 | 54,3 illumina              |
| Cladophialophora carrionii    | Ascomycota | Peizozymcotina | Eurotiomycetes  | Chaetothiyomycetidae | Chaetothyriales | Herpotrichiellaceae | CBS 160.54      | Gp0037643        | A0FF01  | 185784 human pathogen (chromoblastomycosis ); dermatiaceous                        | 28,99   | 80,00  | 102   | 19   | 10428 | 54,3 illumina              |
| Cladophialophora immunda      | Ascomycota | Peizozymcotina | Eurotiomycetes  | Chaetothiyomycetidae | Chaetothyriales | Herpotrichiellaceae | CBS 110551      | Gp0117567        | JOEJ01  | 264781 industrial importance (black yeast; bioremediation; degrades polyaromatic   | 41,58   | 318    | 464   |      |       | 12879 52,8 IonTorrent      |
| Cladophialophora immunda      | Ascomycota | Peizozymcotina | Eurotiomycetes  | Chaetothiyomycetidae | Chaetothyriales | Herpotrichiellaceae | CBS 110551      | Gp0117567        | JSEJ01  | 264781 industrial importance (black yeast; bioremediation; degrades polyaromatic t | 41,58   | 318,00 | 464   |      |       | 12879 52,8 IonTorrent      |
| Cladophialophora psammophila  | Ascomycota | Peizozymcotina | Eurotiomycetes  | Chaetothiyomycetidae | Chaetothyriales | Herpotrichiellaceae | CBS 110553      | Gp0037823        | AMGX01  | 164589 industrial importance (bioremediation)                                      | 39,42   | 133,00 | 317   |      |       | 13421 50,6 illumina        |
| Cladophialophora psammophila  | Ascomycota | Peizozymcotina | Eurotiomycetes  | Chaetothiyomycetidae | Chaetothyriales | Herpotrichiellaceae | CBS 110553      | Gp0037823        | AMGX01  | 164589 industrial importance (bioremediation)                                      | 39,42   | 133,00 | 317   |      |       | 13421 50,6 illumina        |
| Cladophialophora yegresii     | Ascomycota | Peizozymcotina | Eurotiomycetes  | Chaetothiyomycetidae | Chaetothyriales | Herpotrichiellaceae | CBS 114405      | Gp0037865        | AMGW01  | 164591 endophyte (cactus); dermatiaceous; potential human pathogen                 | 27,89   | 132,00 | 63    |      |       | 10118 54 illumina          |
| Cladophialophora yegresii     | Ascomycota | Peizozymcotina | Eurotiomycetes  | Chaetothiyomycetidae | Chaetothyriales | Herpotrichiellaceae | CBS 114405      | Gp0037865        | AMGW01  | 164591 endophyte (cactus); dermatiaceous; potential human pathogen                 | 27,89   | 132,00 | 63    |      |       | 10118 54 illumina          |
| Coniosporium apollinis        | Ascomycota | Peizozymcotina | Eurotiomycetes  | Chaetothiyomycetidae | Chaetothyriales | Herpotrichiellaceae | CBS 352.97      | Gp0037641        | AJKL01  | 157061 rock-inhabiting black yeast                                                 | 28,64   | 128,00 | 241   | 169  | 9367  | 52,1 illumina              |
| Coniosporium apollinis        | Ascomycota | Peizozymcotina | Eurotiomycetes  | Chaetothiyomycetidae | Chaetothyriales | Herpotrichiellaceae | CBS 352.97      | Gp0037641        | AJKL01  | 157061 rock-inhabiting black yeast                                                 | 28,64   | 128    | 241   | 169  | 9367  | 52,1 illumina              |
| Exophiala alcalophila         | Ascomycota | Peizozymcotina | Eurotiomycetes  | Chaetothiyomycetidae | Chaetothyriales | Herpotrichiellaceae | JCM 1751        | Gp0144016        | BCHY01  | 313825 black yeast; soil-associated                                                | 29,85   | 209    | 85    | 12   |       | 54,1 HiSeq 2500            |
| Exophiala alcalophila         | Ascomycota | Peizozymcotina | Eurotiomycetes  | Chaetothiyomycetidae | Chaetothyriales | Herpotrichiellaceae | JCM 1751        | Gp0144016        | BCHY01  | 313825 black yeast; soil-associated                                                | 29,85   | 209    | 85    | 12   |       | 54,1 HiSeq 2500            |
| Exophiala aquamarina          | Ascomycota | Peizozymcotina | Eurotiomycetes  | Chaetothiyomycetidae | Chaetothyriales | Herpotrichiellaceae | CBS 119918      | Gp0037642        | AMGV01  | 164593 animal pathogen (marine)                                                    | 41,566  | 79,00  | 687   | 151  | 13118 | 49 illumina                |

|                                    |            |                |                |                  |            |                |               |                      |        |                                                           |         |        |      |       |                  |                     |
|------------------------------------|------------|----------------|----------------|------------------|------------|----------------|---------------|----------------------|--------|-----------------------------------------------------------|---------|--------|------|-------|------------------|---------------------|
| <i>Aspergillus carbonarius</i>     | Ascomycota | Peizozymcotina | Eurotiomycetes | Eurotiomycetidae | Eurotiales | Aspergillaceae | ITEM 5010     | Gp0003596            | JGI    | 34741 industrial importance                               | 36,3    | 17,78  | 1346 | 963   | 11624            | 51 454; Sanger      |
| <i>Aspergillus chevalieri</i>      | Ascomycota | Peizozymcotina | Eurotiomycetes | Eurotiomycetidae | Eurotiales | Aspergillaceae | JCM 23047     | Gp0144024            | BCIE01 | 313830 opportunistic human pathogen                       | 28,01   | 313    | 342  | 75    |                  | 48 HiSeq 2500       |
| <i>Aspergillus chevalieri</i>      | Ascomycota | Peizozymcotina | Eurotiomycetes | Eurotiomycetidae | Eurotiales | Aspergillaceae | JCM 23047     | Gp0144024            | BCIE01 | 313830 opportunistic human pathogen                       | 28,01   | 313,00 | 342  | 75    |                  | 48 HiSeq 2500       |
| <i>Aspergillus clavatus</i>        | Ascomycota | Peizozymcotina | Eurotiomycetes | Eurotiomycetidae | Eurotiales | Aspergillaceae | NRRL 1        | Gp0002493            | AAKD03 | 15664 soil- and manure-associated; occasional pathogen    | 27,9    | 11,4   | 231  | 143   |                  | 49 Sanger           |
| <i>Aspergillus clavatus</i>        | Ascomycota | Peizozymcotina | Eurotiomycetes | Eurotiomycetidae | Eurotiales | Aspergillaceae | NRRL 1        | Gp0002493            | AAKD03 | 15664 soil- and manure-associated; occasional pathogen    | 27,9    | 11,40  | 231  | 143   |                  | 49 Sanger           |
| <i>Aspergillus flavus</i>          | Ascomycota | Peizozymcotina | Eurotiomycetes | Eurotiomycetidae | Eurotiales | Aspergillaceae | NRRL 3357     | Gp0002470            | AAIH02 | 13284 post-harvest decay                                  | 36,9    | 5      |      | 331   |                  | 48 Sanger           |
| <i>Aspergillus flavus</i>          | Ascomycota | Peizozymcotina | Eurotiomycetes | Eurotiomycetidae | Eurotiales | Aspergillaceae | NRRL 3357     | Gp0002470            | AAIH02 | 13284 post-harvest decay                                  | 36,9    | 5,00   |      | 331   |                  | 48 Sanger           |
| <i>Aspergillus fumigatus</i>       | Ascomycota | Peizozymcotina | Eurotiomycetes | Eurotiomycetidae | Eurotiales | Aspergillaceae | A1163 (CEA10) | Gp0002472            | ABDB01 | 18733 opportunistic human pathogen; saprotroph            | 29,2    | 10,00  |      | 55    |                  | Sanger              |
| <i>Aspergillus fumigatus</i>       | Ascomycota | Peizozymcotina | Eurotiomycetes | Eurotiomycetidae | Eurotiales | Aspergillaceae | A1163 (CEA10) | Gp0002472            | ABDB01 | 18733 opportunistic human pathogen; saprotroph            | 29,2    | 10,00  |      | 55    |                  | Sanger              |
| <i>Aspergillus glaucus</i>         | Ascomycota | Peizozymcotina | Eurotiomycetes | Eurotiomycetidae | Eurotiales | Aspergillaceae | CBS 516.65    | Gp0010048            | JGI    | 169684 saprotroph                                         | 27,99   | 175,90 | 433  | 82    | 11277            | 454 GS-FLX          |
| <i>Aspergillus glaucus</i>         | Ascomycota | Peizozymcotina | Eurotiomycetes | Eurotiomycetidae | Eurotiales | Aspergillaceae | CBS 516.65    | Gp0010048            | JGI    | 169684 saprotroph                                         | 27,99   | 175,90 | 433  | 82    | 11277            | 454 GS-FLX          |
| <i>Aspergillus kawachii</i>        | Ascomycota | Peizozymcotina | Eurotiomycetes | Eurotiomycetidae | Eurotiales | Aspergillaceae | IFO 4308      | Gp0039000            | BACL01 | 66971 industrial importance                               | 37,1    | 17,00  |      | 1163  | 11472            | 49 454 GS-FLX       |
| <i>Aspergillus kawachii</i>        | Ascomycota | Peizozymcotina | Eurotiomycetes | Eurotiomycetidae | Eurotiales | Aspergillaceae | IFO 4308      | Gp0039000            | BACL01 | 66971 industrial importance                               | 37,1    | 17,00  |      | 1163  | 11472            | 49 454 GS-FLX       |
| <i>Aspergillus lentulus</i>        | Ascomycota | Peizozymcotina | Eurotiomycetes | Eurotiomycetidae | Eurotiales | Aspergillaceae | IFM 54703     | Gp0144501            | BCLY01 | 300219 opportunistic human pathogen                       | 30,96   |        | 19   | 9986  | 49,5 PacBio RSII |                     |
| <i>Aspergillus lentulus</i>        | Ascomycota | Peizozymcotina | Eurotiomycetes | Eurotiomycetidae | Eurotiales | Aspergillaceae | IFM 54703     | Gp0144501            | BCLY01 | 300219 opportunistic human pathogen                       | 30,96   |        | 19   | 9986  | 49,5 PacBio RSII |                     |
| <i>Aspergillus luchuensis</i>      | Ascomycota | Peizozymcotina | Eurotiomycetes | Eurotiomycetidae | Eurotiales | Aspergillaceae | RIB 2604      | Gp0143306            | BCWF01 | 314070 industrial importance                              | 34,18   |        | 44   | 12920 | 49,9 ABI 3730    |                     |
| <i>Aspergillus luchuensis</i>      | Ascomycota | Peizozymcotina | Eurotiomycetes | Eurotiomycetidae | Eurotiales | Aspergillaceae | RIB 2604      | Gp0143306            | BCWF01 | 314070 industrial importance                              | 34,18   |        | 44   | 12920 | 49,9 ABI 3730    |                     |
| <i>Aspergillus nidulans</i>        | Ascomycota | Peizozymcotina | Eurotiomycetes | Eurotiomycetidae | Eurotiales | Aspergillaceae | FGSC A4       | Gp0000218; Gp000 JGI |        | 130 human pathogen                                        | 30,48   | 1,00   | 82   | 8     | 10680            | 51 Sanger           |
| <i>Aspergillus nidulans</i>        | Ascomycota | Peizozymcotina | Eurotiomycetes | Eurotiomycetidae | Eurotiales | Aspergillaceae | FGSC A4       | Gp0000218; Gp000 JGI |        | 130 human pathogen                                        | 30,48   | 1,00   | 82   | 8     | 10680            | 51 Sanger           |
| <i>Aspergillus niger</i>           | Ascomycota | Peizozymcotina | Eurotiomycetes | Eurotiomycetidae | Eurotiales | Aspergillaceae | CBS 513.88    | Gp0000211; Gp001 JGI |        | 19275 industrial importance                               | 34,85   | 8,90   |      | 21    | 11197            | 50                  |
| <i>Aspergillus niger</i>           | Ascomycota | Peizozymcotina | Eurotiomycetes | Eurotiomycetidae | Eurotiales | Aspergillaceae | CBS 513.88    | Gp0000211; Gp001 JGI |        | 19275 industrial importance                               | 34,85   | 8,90   |      | 21    | 11197            | 50                  |
| <i>Aspergillus nomius</i>          | Ascomycota | Peizozymcotina | Eurotiomycetes | Eurotiomycetidae | Eurotiales | Aspergillaceae | NRRL13137     | Gp0120416            | JNOM01 | 246595 human pathogen (aspergillosis)                     | 36,14   | 42     | 1118 | 11914 | 48,9 IonTorrent  |                     |
| <i>Aspergillus nomius</i>          | Ascomycota | Peizozymcotina | Eurotiomycetes | Eurotiomycetidae | Eurotiales | Aspergillaceae | NRRL13137     | Gp0120416            | JNOM01 | 246595 human pathogen (aspergillosis)                     | 36,14   | 42,00  | 1118 | 11914 | 48,9 IonTorrent  |                     |
| <i>Aspergillus ochraceoroseus</i>  | Ascomycota | Peizozymcotina | Eurotiomycetes | Eurotiomycetidae | Eurotiales | Aspergillaceae | SRRC1432      | Gp0117374            | JYKN01 | 275128 medical importance (mycotoxin-producing)           | 24,27   | 39     | 3590 | 7829  | 48,2 IonTorrent  |                     |
| <i>Aspergillus ochraceoroseus</i>  | Ascomycota | Peizozymcotina | Eurotiomycetes | Eurotiomycetidae | Eurotiales | Aspergillaceae | SRRC1432      | Gp0117374            | JYKN01 | 275128 medical importance (mycotoxin-producing)           | 24,27   | 39,00  | 3590 | 7829  | 48,2 IonTorrent  |                     |
| <i>Aspergillus oryzae</i>          | Ascomycota | Peizozymcotina | Eurotiomycetes | Eurotiomycetidae | Eurotiales | Aspergillaceae | AS 3.951      | Gp0038983            | AKXN01 | 89727 industrial importance                               | 36,3    | 7,00   | 969  |       |                  | illumina GAI        |
| <i>Aspergillus oryzae</i>          | Ascomycota | Peizozymcotina | Eurotiomycetes | Eurotiomycetidae | Eurotiales | Aspergillaceae | AS 3.951      | Gp0038983            | AKXN01 | 89727 industrial importance                               | 36,3    | 7,00   | 969  |       |                  | illumina GAI        |
| <i>Aspergillus parasiticus</i>     | Ascomycota | Peizozymcotina | Eurotiomycetes | Eurotiomycetidae | Eurotiales | Aspergillaceae | SU-1          | Gp0094495            | JMUG01 | 246303 medical importance (aflatoxin-producing)           | 40      | 50,00  | 4409 |       |                  | illumina HiSeq      |
| <i>Aspergillus parasiticus</i>     | Ascomycota | Peizozymcotina | Eurotiomycetes | Eurotiomycetidae | Eurotiales | Aspergillaceae | SU-1          | Gp0094495            | JMUG01 | 246303 medical importance (aflatoxin-producing)           | 40      | 50,00  | 4409 |       |                  | illumina HiSeq      |
| <i>Aspergillus penicillii</i>      | Ascomycota | Peizozymcotina | Eurotiomycetes | Eurotiomycetidae | Eurotiales | Aspergillaceae | SRRC1468      | Gp0117376            | JZBS01 | 275129 medical importance (mycotoxin-producing)           | 26,44   | 89     | 4177 | 7761  | 45,8 IonTorrent  |                     |
| <i>Aspergillus penicillii</i>      | Ascomycota | Peizozymcotina | Eurotiomycetes | Eurotiomycetidae | Eurotiales | Aspergillaceae | SRRC1468      | Gp0117376            | JZBS01 | 275129 medical importance (mycotoxin-producing)           | 26,44   | 89,00  | 4177 | 7761  | 45,8 IonTorrent  |                     |
| <i>Aspergillus ruber</i>           | Ascomycota | Peizozymcotina | Eurotiomycetes | Eurotiomycetidae | Eurotiales | Aspergillaceae | CBS 135680    | Gp0010009            | JGI    | 215335 halotolerant                                       | 26,21   | 91,70  | 371  | 110   | 10076            | 454; illumina       |
| <i>Aspergillus ruber</i>           | Ascomycota | Peizozymcotina | Eurotiomycetes | Eurotiomycetidae | Eurotiales | Aspergillaceae | CBS 135680    | Gp0010009            | JGI    | 215335 halotolerant                                       | 26,21   | 91,70  | 371  | 110   | 10076            | 454; illumina       |
| <i>Aspergillus sojae</i>           | Ascomycota | Peizozymcotina | Eurotiomycetes | Eurotiomycetidae | Eurotiales | Aspergillaceae | NBRCC 4239    | Gp0038873            | BACA01 | 60265 traditional use                                     | 39,7    | 14,00  |      | 542   |                  | 454                 |
| <i>Aspergillus sojae</i>           | Ascomycota | Peizozymcotina | Eurotiomycetes | Eurotiomycetidae | Eurotiales | Aspergillaceae | NBRCC 4239    | Gp0038873            | BACA01 | 60265 traditional use                                     | 39,7    | 14,00  |      | 542   |                  | 454                 |
| <i>Aspergillus sp. Z5</i>          | Ascomycota | Peizozymcotina | Eurotiomycetes | Eurotiomycetidae | Eurotiales | Aspergillaceae | Z5            | Gp0120939            | LDZW01 | 285783 marine fungus; secondary metabolite biosynthesis   | 33,81   | 100    | 956  |       |                  | 50,5 illumina HiSeq |
| <i>Aspergillus sp. Z5</i>          | Ascomycota | Peizozymcotina | Eurotiomycetes | Eurotiomycetidae | Eurotiales | Aspergillaceae | Z5            | Gp0120939            | LDZW01 | 285783 marine fungus; secondary metabolite biosynthesis   | 33,81   | 100,00 | 956  |       |                  | 50,5 illumina HiSeq |
| <i>Aspergillus sydowii</i>         | Ascomycota | Peizozymcotina | Eurotiomycetes | Eurotiomycetidae | Eurotiales | Aspergillaceae | CBS 593.65    | Gp0009566            | JGI    | 207689 animal pathogen (sea fan corals)                   | 34,38   | 95,10  | 133  | 97    | 13620            | 454 GS-FLX          |
| <i>Aspergillus sydowii</i>         | Ascomycota | Peizozymcotina | Eurotiomycetes | Eurotiomycetidae | Eurotiales | Aspergillaceae | CBS 593.65    | Gp0009566            | JGI    | 207689 animal pathogen (sea fan corals)                   | 34,38   | 95,10  | 133  | 97    | 13620            | 454 GS-FLX          |
| <i>Aspergillus terreus</i>         | Ascomycota | Peizozymcotina | Eurotiomycetes | Eurotiomycetidae | Eurotiales | Aspergillaceae | NH2624        | Gp0002492            | JGI    | 15631 soil-associated; cosmopolitan                       | 29,33   | 11,50  | 267  | 26    | 10406            | 53 Sanger           |
| <i>Aspergillus terreus</i>         | Ascomycota | Peizozymcotina | Eurotiomycetes | Eurotiomycetidae | Eurotiales | Aspergillaceae | NH2624        | Gp0002492            | JGI    | 15631 soil-associated; cosmopolitan                       | 29,33   | 11,50  | 267  | 26    | 10406            | 53 Sanger           |
| <i>Aspergillus tubingensis</i>     | Ascomycota | Peizozymcotina | Eurotiomycetes | Eurotiomycetidae | Eurotiales | Aspergillaceae | CBS 134.48    | Gp0010145            | JGI    | 207690 industrial importance                              | 35,15   | 125,70 | 87   | 33    | 12322            | 454; illumina       |
| <i>Aspergillus tubingensis</i>     | Ascomycota | Peizozymcotina | Eurotiomycetes | Eurotiomycetidae | Eurotiales | Aspergillaceae | CBS 134.48    | Gp0010145            | JGI    | 207690 industrial importance                              | 35,15   | 125,70 | 87   | 33    | 12322            | 454; illumina       |
| <i>Aspergillus udagawae</i>        | Ascomycota | Peizozymcotina | Eurotiomycetes | Eurotiomycetidae | Eurotiales | Aspergillaceae | IFM 46973     | Gp0122201            | BBXM01 | 288122 animal pathogen; aspergillosis                     | 32,19   |        | 1029 | 10214 | 49,6 HiSeq 1500  |                     |
| <i>Aspergillus udagawae</i>        | Ascomycota | Peizozymcotina | Eurotiomycetes | Eurotiomycetidae | Eurotiales | Aspergillaceae | IFM 46973     | Gp0122201            | BBXM01 | 288122 animal pathogen; aspergillosis                     | 32,19   |        | 1029 | 10214 | 49,6 HiSeq 1500  |                     |
| <i>Aspergillus ustus</i>           | Ascomycota | Peizozymcotina | Eurotiomycetes | Eurotiomycetidae | Eurotiales | Aspergillaceae | 3.3904        | Gp0117377            | JOMC01 | 253260 opportunistic human pathogen                       | 38,35   | 100    | 1502 | 770   |                  | 51 illumina HiSeq   |
| <i>Aspergillus ustus</i>           | Ascomycota | Peizozymcotina | Eurotiomycetes | Eurotiomycetidae | Eurotiales | Aspergillaceae | 3.3904        | Gp0117377            | JOMC01 | 253260 opportunistic human pathogen                       | 38,35   | 100,00 | 1502 | 770   |                  | 51 illumina HiSeq   |
| <i>Aspergillus versicolor</i>      | Ascomycota | Peizozymcotina | Eurotiomycetes | Eurotiomycetidae | Eurotiales | Aspergillaceae | CBS 583.65    | Gp0010019            | JGI    | 207687 industrial importance                              | 33,13   | 178,10 | 58   | 51    | 13228            | 454 GS-FLX          |
| <i>Aspergillus versicolor</i>      | Ascomycota | Peizozymcotina | Eurotiomycetes | Eurotiomycetidae | Eurotiales | Aspergillaceae | CBS 583.65    | Gp0010019            | JGI    | 207687 industrial importance                              | 33,13   | 178,10 | 58   | 51    | 13228            | 454 GS-FLX          |
| <i>Aspergillus wentii</i>          | Ascomycota | Peizozymcotina | Eurotiomycetes | Eurotiomycetidae | Eurotiales | Aspergillaceae | DTO 134E9     | Gp0009565            | JGI    | 170886 industrial importance                              | 31,35   | 95,00  | 118  | 27    | 12442            | illumina            |
| <i>Aspergillus wentii</i>          | Ascomycota | Peizozymcotina | Eurotiomycetes | Eurotiomycetidae | Eurotiales | Aspergillaceae | DTO 134E9     | Gp0009565            | JGI    | 170886 industrial importance                              | 31,35   | 95,00  | 118  | 27    | 12442            | illumina            |
| <i>Aspergillus westerdijkiae</i>   | Ascomycota | Peizozymcotina | Eurotiomycetes | Eurotiomycetidae | Eurotiales | Aspergillaceae | CBS 112803    | Gp0124190            | LKBE01 | 296723 medical importance (mycotoxin-producing)           | 36,07   | 142    | 3022 | 239   |                  | 50,2 illumina MiSeq |
| <i>Aspergillus westerdijkiae</i>   | Ascomycota | Peizozymcotina | Eurotiomycetes | Eurotiomycetidae | Eurotiales | Aspergillaceae | CBS 112803    | Gp0124190            | LKBE01 | 296723 medical importance (mycotoxin-producing)           | 36,07   | 142,00 | 3022 | 239   |                  | 50,2 illumina MiSeq |
| <i>Aspergillus zonatus</i>         | Ascomycota | Peizozymcotina | Eurotiomycetes | Eurotiomycetidae | Eurotiales | Aspergillaceae | CBS 506.65    | Gp0009569            | JGI    | 207688 industrial importance                              | 28,92   | 84,80  | 460  | 260   | 9886             | illumina            |
| <i>Aspergillus zonatus</i>         | Ascomycota | Peizozymcotina | Eurotiomycetes | Eurotiomycetidae | Eurotiales | Aspergillaceae | CBS 506.65    | Gp0009569            | JGI    | 207688 industrial importance                              | 28,92   | 84,80  | 460  | 260   | 9886             | illumina            |
| <i>Basipetospora chlamydispora</i> | Ascomycota | Peizozymcotina | Eurotiomycetes | Eurotiomycetidae | Eurotiales | Aspergillaceae | JCM 23157     | Gp0144025            | BCHP01 | 313817 uncertain                                          | 33,49   | 162    | 342  | 17    |                  | 55,7 HiSeq 2500     |
| <i>Basipetospora chlamydispora</i> | Ascomycota | Peizozymcotina | Eurotiomycetes | Eurotiomycetidae | Eurotiales | Aspergillaceae | JCM 23157     | Gp0144025            | BCHP01 | 313817 uncertain                                          | 33,49   | 162,00 | 342  | 17    |                  | 55,7 HiSeq 2500     |
| <i>Monascus purpureus</i>          | Ascomycota | Peizozymcotina | Eurotiomycetes | Eurotiomycetidae | Eurotiales | Aspergillaceae | NRRL 1596     | Gp0019248            | JGI    | 204098 industrial importance (toxin producing)            | 23,44   | 102,00 | 319  | 296   | 8918             | illumina HiSeq      |
| <i>Monascus purpureus</i>          | Ascomycota | Peizozymcotina | Eurotiomycetes | Eurotiomycetidae | Eurotiales | Aspergillaceae | NRRL 1596     | Gp0019248            | JGI    | 204098 industrial importance (toxin producing)            | 23,44   | 102,00 | 319  | 296   | 8918             | illumina HiSeq      |
| <i>Monascus ruber</i>              | Ascomycota | Peizozymcotina | Eurotiomycetes | Eurotiomycetidae | Eurotiales | Aspergillaceae | NRRL 1597     | Gp0019414            | JGI    | 196033 industrial importance                              | 24,8    | 123,40 | 362  | 320   | 9650             | illumina HiSeq      |
| <i>Monascus ruber</i>              | Ascomycota | Peizozymcotina | Eurotiomycetes | Eurotiomycetidae | Eurotiales | Aspergillaceae | NRRL 1597     | Gp0019414            | JGI    | 196033 industrial importance                              | 24,8    | 123,40 | 362  | 320   | 9650             | illumina HiSeq      |
| <i>Penicillium aurantiogriseum</i> | Ascomycota | Peizozymcotina | Eurotiomycetes | Eurotiomycetidae | Eurotiales | Aspergillaceae | NRRL 62431    | Gp0038385            | ALY01  | 170336 endophyte                                          | 31,5475 | 50,00  | 4775 |       |                  | 48,5 illumina GAIix |
| <i>Penicillium aurantiogriseum</i> | Ascomycota | Peizozymcotina | Eurotiomycetes | Eurotiomycetidae | Eurotiales | Aspergillaceae | NRRL 62431    | Gp0038385            | ALY01  | 170336 endophyte                                          | 31,5475 | 50,00  | 4775 |       |                  | 48,5 illumina GAIix |
| <i>Penicillium biforme</i>         | Ascomycota | Peizozymcotina | Eurotiomycetes | Eurotiomycetidae | Eurotiales | Aspergillaceae | FM169         | Gp0101004            | CBX001 | 238635 pharmaceutical importance (rugulovasin production) | 34,87   |        | 692  | 582   |                  | 48,1                |
| <i>Penicillium biforme</i>         | Ascomycota | Peizozymcotina | Eurotiomycetes | Eurotiomycetidae | Eurotiales | Aspergillaceae | FM169         | Gp0101004            | CBX001 | 238635 pharmaceutical importance (rugulovasin production) | 34,87   |        | 692  | 582   |                  | 48,1                |
| <i>Penicillium bilaiae</i>         | Ascomycota | Peizozymcotina | Eurotiomycetes | Eurotiomycetidae | Eurotiales | Aspergillaceae | ATCC 20851    | Gp0035113            | JGI    | 196077 P-solubilizing                                     | 37,54   | 101    | 319  | 132   | 13606            | illumina HiSeq      |
| <i>Penicillium bilaiae</i>         | Ascomycota | Peizozymcotina | Eurotiomycetes | Eurotiomycetidae | Eurotiales | Aspergillaceae | ATCC 20851    | Gp0035113            | JGI    | 196077 P-solubilizing                                     | 37,54   | 101,00 | 319  | 132   | 13606            | illumina HiSeq      |
| <i>Penicillium brasilianum</i>     | Ascomycota | Peizozymcotina | Eurotiomycetes | Eurotiomycetidae | Eurotiales | Aspergillaceae | PMG11         | Gp0143650            | CDHK01 | 284459 endophyte                                          | 35,89   |        | 244  | 87    | 11943            | 49,5                |
| <i>Penicillium brasilianum</i>     | Ascomycota | Peizozymcotina | Eurotiomycetes | Eurotiomycetidae | Eurotiales | Aspergillaceae |               |                      |        |                                                           |         |        |      |       |                  |                     |

|                                  |            |                |                |                  |            |                    |                   |           |        |        |                                                                          |         |        |      |      |       |                             |
|----------------------------------|------------|----------------|----------------|------------------|------------|--------------------|-------------------|-----------|--------|--------|--------------------------------------------------------------------------|---------|--------|------|------|-------|-----------------------------|
| Penicillium lanosocoeruleum v1.0 | Ascomycota | Pezizomycotina | Eurotiomycetes | Eurotiomycetidae | Eurotiales | Aspergillaceae     | ATCC 48919        | Gp0035117 | JGI    | 208390 | pharmaceutical importance (antibiotic- and mycotoxin-producing)          | 29,05   | 113    | 148  | 13   | 10698 | illumina                    |
| Penicillium lanosocoeruleum v1.0 | Ascomycota | Pezizomycotina | Eurotiomycetes | Eurotiomycetidae | Eurotiales | Aspergillaceae     | ATCC 48919        | Gp0035117 | JGI    | 208390 | pharmaceutical importance (antibiotic- and mycotoxin-producing)          | 29,05   | 113,00 | 148  | 13   | 10698 | illumina                    |
| Penicillium nalgiouense          | Ascomycota | Pezizomycotina | Eurotiomycetes | Eurotiomycetidae | Eurotiales | Aspergillaceae     | FM193             | Gp0101010 | CBXQ01 | 238637 | industrial importance (fermentation; metabolite production)              | 31,9375 |        | 975  | 896  |       | 48,5                        |
| Penicillium nalgiouense          | Ascomycota | Pezizomycotina | Eurotiomycetes | Eurotiomycetidae | Eurotiales | Aspergillaceae     | FM193             | Gp0101010 | CBXQ01 | 238637 | industrial importance (fermentation; metabolite production)              | 31,9375 |        | 975  | 896  |       | 48,5                        |
| Penicillium nordicum             | Ascomycota | Pezizomycotina | Eurotiomycetes | Eurotiomycetidae | Eurotiales | Aspergillaceae     | BFE487            | Gp0090030 | JNNR01 | 239658 | contaminant (food; toxicogenic)                                          | 30,421  | 20,00  | 915  |      |       | 47,7 illumina HiSeq         |
| Penicillium nordicum             | Ascomycota | Pezizomycotina | Eurotiomycetes | Eurotiomycetidae | Eurotiales | Aspergillaceae     | BFE487            | Gp0090030 | JNNR01 | 239658 | contaminant (food; toxicogenic)                                          | 30,421  | 20,00  | 915  |      |       | 47,7 illumina HiSeq         |
| Penicillium oxalicum             | Ascomycota | Pezizomycotina | Eurotiomycetes | Eurotiomycetidae | Eurotiales | Aspergillaceae     | 114-2             |           | AGIH01 | 60877  | lignocellulolytic                                                        | 30,18   | 28     | 345  | 9    | 9979  |                             |
| Penicillium oxalicum             | Ascomycota | Pezizomycotina | Eurotiomycetes | Eurotiomycetidae | Eurotiales | Aspergillaceae     | 114-2             |           | AGIH01 | 60877  | lignocellulolytic                                                        | 30,18   | 28,00  | 345  | 9    | 9979  |                             |
| Penicillium paneum               | Ascomycota | Pezizomycotina | Eurotiomycetes | Eurotiomycetidae | Eurotiales | Aspergillaceae     | FM227             | Gp0101011 | CBXN01 | 238634 | contaminant (cereal; toxicogenic)                                        | 26,5793 |        | 397  | 224  |       | 49                          |
| Penicillium paneum               | Ascomycota | Pezizomycotina | Eurotiomycetes | Eurotiomycetidae | Eurotiales | Aspergillaceae     | FM227             | Gp0101011 | CBXN01 | 238634 | contaminant (cereal; toxicogenic)                                        | 26,5793 |        | 397  | 224  |       | 49                          |
| Penicillium pauxilli             | Ascomycota | Pezizomycotina | Eurotiomycetes | Eurotiomycetidae | Eurotiales | Aspergillaceae     | ATCC 26601        | Gp0038413 | AOTG01 | 189173 | pharmaceutical importance (production of paxelline and antimicrobial cor | 34,8    | 150,00 | 635  | 420  |       | 47,9 illumina MiSeq         |
| Penicillium pauxilli             | Ascomycota | Pezizomycotina | Eurotiomycetes | Eurotiomycetidae | Eurotiales | Aspergillaceae     | ATCC 26601        | Gp0038413 | AOTG01 | 189173 | pharmaceutical importance (production of paxelline and antimicrobial cor | 34,8    | 150,00 | 635  | 420  |       | 47,9 illumina MiSeq         |
| Penicillium raistrickii          | Ascomycota | Pezizomycotina | Eurotiomycetes | Eurotiomycetidae | Eurotiales | Aspergillaceae     | ATCC 10490        | Gp0039212 | JGI    | 217210 | calcium phosphate solubilizer                                            | 31,44   | 95,10  | 104  | 76   | 11368 |                             |
| Penicillium raistrickii          | Ascomycota | Pezizomycotina | Eurotiomycetes | Eurotiomycetidae | Eurotiales | Aspergillaceae     | ATCC 10490        | Gp0039212 | JGI    | 217210 | calcium phosphate solubilizer                                            | 31,44   | 95,10  | 104  | 76   | 11368 |                             |
| Penicillium roqueforti           | Ascomycota | Pezizomycotina | Eurotiomycetes | Eurotiomycetidae | Eurotiales | Aspergillaceae     | FM164             | Gp0101012 | CBMR01 | 214067 | industrial importance (cheese-making)                                    | 29,01   |        | 157  | 48   | 12425 | 48,7                        |
| Penicillium roqueforti           | Ascomycota | Pezizomycotina | Eurotiomycetes | Eurotiomycetidae | Eurotiales | Aspergillaceae     | FM164             | Gp0101012 | CBMR01 | 214067 | industrial importance (cheese-making)                                    | 29,01   |        | 157  | 48   | 12425 | 48,7                        |
| Penicillium rubens               | Ascomycota | Pezizomycotina | Eurotiomycetes | Eurotiomycetidae | Eurotiales | Aspergillaceae     | Wisconsin 54-1255 | Gp0003458 | JGI    | 27927  | industrial importance (penicillin production)                            | 32,22   | 9,8    | 242  | 49   | 13671 |                             |
| Penicillium rubens               | Ascomycota | Pezizomycotina | Eurotiomycetes | Eurotiomycetidae | Eurotiales | Aspergillaceae     | Wisconsin 54-1255 | Gp0003458 | JGI    | 27927  | industrial importance (penicillin production)                            | 32,22   | 9,80   | 242  | 49   | 13671 |                             |
| Penicillium rubens               | Ascomycota | Pezizomycotina | Eurotiomycetes | Eurotiomycetidae | Eurotiales | Aspergillaceae     | Wisconsin 54-1255 | Gp0003458 | JYNM02 | 225689 | post-harvest decay                                                       | 35,23   | 7,00   |      |      |       | 47,1                        |
| Penicillium solitum              | Ascomycota | Pezizomycotina | Eurotiomycetes | Eurotiomycetidae | Eurotiales | Aspergillaceae     | BFE808            | Gp0121007 | LAKW01 | 276626 | medical importance (ochratoxin-producing)                                | 31,15   | 60     | 4207 |      |       | 48,1 illumina MiSeq         |
| Penicillium solitum              | Ascomycota | Pezizomycotina | Eurotiomycetes | Eurotiomycetidae | Eurotiales | Aspergillaceae     | BFE808            | Gp0121007 | LAKW01 | 276626 | medical importance (ochratoxin-producing)                                | 31,15   | 60,00  | 4207 |      |       | 48,1 illumina MiSeq         |
| Penicillium verrucosum           | Ascomycota | Pezizomycotina | Eurotiomycetes | Eurotiomycetidae | Eurotiales | Aspergillaceae     | FRR 0525          | Gp0144500 | CCCX01 | 271389 | xerophile                                                                | 22,03   |        | 1479 | 572  |       | 29,4                        |
| Penicillium verrucosum           | Ascomycota | Pezizomycotina | Eurotiomycetes | Eurotiomycetidae | Eurotiales | Aspergillaceae     | FRR 0525          | Gp0144500 | CCCX01 | 271389 | xerophile                                                                | 22,03   |        | 1479 | 572  |       | 29,4                        |
| Xeromyces bisporus               | Ascomycota | Pezizomycotina | Eurotiomycetes | Eurotiomycetidae | Eurotiales | Thermoascaceae     | No. 5             | Gp0070862 | BAUL01 | 227278 | industrial importance (formaldehyde resistant)                           | 29,76   | 53,5   | 1053 |      |       | 8877 48,6 illumina          |
| Xeromyces bisporus               | Ascomycota | Pezizomycotina | Eurotiomycetes | Eurotiomycetidae | Eurotiales | Thermoascaceae     | No. 5             | Gp0070862 | BAUL01 | 227278 | industrial importance (formaldehyde resistant)                           | 29,76   | 53,50  | 1053 |      |       | 8877 48,6 illumina          |
| Byssoschlamys spectabilis        | Ascomycota | Pezizomycotina | Eurotiomycetes | Eurotiomycetidae | Eurotiales | Thermoascaceae     | ATCC 26904        | Gp0017900 | JGI    | 207868 | industrial importance (thermophile)                                      | 28,49   | 95,90  | 196  | 48   | 8798  | illumina                    |
| Byssoschlamys spectabilis        | Ascomycota | Pezizomycotina | Eurotiomycetes | Eurotiomycetidae | Eurotiales | Thermoascaceae     | ATCC 26904        | Gp0017900 | JGI    | 207868 | industrial importance (thermophile)                                      | 28,49   | 95,90  | 196  | 48   | 8798  | illumina                    |
| Thermoascus aurantiacus          | Ascomycota | Pezizomycotina | Eurotiomycetes | Eurotiomycetidae | Eurotiales | Thermoascaceae     | ATCC 26904        | Gp0017900 | JGI    | 207868 | industrial importance (thermophile)                                      | 28,49   | 95,90  | 196  | 48   | 8798  | illumina                    |
| Thermoascus aurantiacus          | Ascomycota | Pezizomycotina | Eurotiomycetes | Eurotiomycetidae | Eurotiales | Thermoascaceae     | JCM 12817         | Gp0144001 | BCIC01 | 313828 | thermophile                                                              | 31,64   | 195    | 258  | 33   |       | 49,2 HiSeq 2500             |
| Thermoascus crustaceus           | Ascomycota | Pezizomycotina | Eurotiomycetes | Eurotiomycetidae | Eurotiales | Thermoascaceae     | JCM 12817         | Gp0144001 | BCIC01 | 313828 | thermophile                                                              | 31,64   | 195,00 | 258  | 33   |       | 49,2 HiSeq 2500             |
| Neosartorya fischeri             | Ascomycota | Pezizomycotina | Eurotiomycetes | Eurotiomycetidae | Eurotiales | Trichocomaceae     | NRRL 181          | Gp0006742 | AAKE03 | 15672  | opportunistic human pathogen                                             | 32,55   | 1,00   | 976  | 976  | 10406 | 49 Sanger                   |
| Neosartorya fischeri             | Ascomycota | Pezizomycotina | Eurotiomycetes | Eurotiomycetidae | Eurotiales | Trichocomaceae     | NRRL 181          | Gp0006742 | AAKE03 | 15672  | opportunistic human pathogen                                             | 32,55   | 1,00   | 976  | 976  | 10406 | 49 Sanger                   |
| Rasamsonia emersonii             | Ascomycota | Pezizomycotina | Eurotiomycetes | Eurotiomycetidae | Eurotiales | Trichocomaceae     | CBS393.64         | Gp0021159 | LASV01 | 222976 | thermophile                                                              | 28,25   | 14,50  | 862  | 9843 |       | 50,6 Sanger; 454            |
| Rasamsonia emersonii             | Ascomycota | Pezizomycotina | Eurotiomycetes | Eurotiomycetidae | Eurotiales | Trichocomaceae     | CBS393.64         | Gp0021159 | LASV01 | 222976 | thermophile                                                              | 28,25   | 14,50  | 862  | 9843 |       | 50,6 Sanger; 454            |
| Talaromyces aculeatus            | Ascomycota | Pezizomycotina | Eurotiomycetes | Eurotiomycetidae | Eurotiales | Trichocomaceae     | ATCC 10409        | Gp0039191 | JGI    | 217211 | iron phosphate solubilizer                                               | 37,27   | 91,80  | 165  | 49   | 13793 | illumina                    |
| Talaromyces aculeatus            | Ascomycota | Pezizomycotina | Eurotiomycetes | Eurotiomycetidae | Eurotiales | Trichocomaceae     | ATCC 10409        | Gp0039191 | JGI    | 217211 | iron phosphate solubilizer                                               | 37,27   | 91,80  | 165  | 49   | 13793 | illumina                    |
| Talaromyces aculeatus            | Ascomycota | Pezizomycotina | Eurotiomycetes | Eurotiomycetidae | Eurotiales | Trichocomaceae     | ATCC 10409        | Gp0039191 | JGI    | 217211 | iron phosphate solubilizer                                               | 37,27   | 91,80  | 165  | 49   | 13793 | illumina                    |
| Talaromyces cellulolyticus       | Ascomycota | Pezizomycotina | Eurotiomycetes | Eurotiomycetidae | Eurotiales | Trichocomaceae     | Y-94              | Gp0122238 | BFPS01 | 271761 | industrial importance (cellulase production)                             | 36,4    | 19     | 1723 | 60   | 10910 | 46,6                        |
| Talaromyces cellulolyticus       | Ascomycota | Pezizomycotina | Eurotiomycetes | Eurotiomycetidae | Eurotiales | Trichocomaceae     | Y-94              | Gp0122238 | BFPS01 | 271761 | industrial importance (cellulase production)                             | 36,4    | 19,00  | 1723 | 60   | 10910 | 46,6                        |
| Talaromyces islandicus           | Ascomycota | Pezizomycotina | Eurotiomycetes | Eurotiomycetidae | Eurotiales | Trichocomaceae     | PIS               | Gp0143952 | CVMT01 | 282635 | industrial importance (biopolymer degradation, mycotoxins)               | 34,72   |        | 1345 | 116  | 9927  | 46,3                        |
| Talaromyces islandicus           | Ascomycota | Pezizomycotina | Eurotiomycetes | Eurotiomycetidae | Eurotiales | Trichocomaceae     | PIS               | Gp0143952 | CVMT01 | 282635 | industrial importance (biopolymer degradation, mycotoxins)               | 34,72   |        | 1345 | 116  | 9927  | 46,3                        |
| Talaromyces islandicus           | Ascomycota | Pezizomycotina | Eurotiomycetes | Eurotiomycetidae | Eurotiales | Trichocomaceae     | PIS               | Gp0143952 | CVMT01 | 282635 | industrial importance (biopolymer degradation, mycotoxins)               | 34,72   |        | 1345 | 116  | 9927  | 46,3                        |
| Talaromyces leycettanus          | Ascomycota | Pezizomycotina | Eurotiomycetes | Eurotiomycetidae | Eurotiales | Trichocomaceae     | CBS 398.68        | Gp0107549 | JSVW01 | 261108 | industrial importance (thermophilic enzymes)                             | 25,95   | 180    | 991  |      |       | 49,7 illumina HiSeq         |
| Talaromyces leycettanus          | Ascomycota | Pezizomycotina | Eurotiomycetes | Eurotiomycetidae | Eurotiales | Trichocomaceae     | CBS 398.68        | Gp0107549 | JSVW01 | 261108 | industrial importance (thermophilic enzymes)                             | 25,95   | 180,00 | 991  |      |       | 49,7 illumina HiSeq         |
| Talaromyces marneffii            | Ascomycota | Pezizomycotina | Eurotiomycetes | Eurotiomycetidae | Eurotiales | Trichocomaceae     | ATCC 18224        | Gp0002656 | ABAR01 | 19555  | opportunistic pathogen (dimorphic; penicilliosis)                        | 28,64   | 8,8    | 524  | 452  | 10638 | 47 Sanger                   |
| Talaromyces marneffii            | Ascomycota | Pezizomycotina | Eurotiomycetes | Eurotiomycetidae | Eurotiales | Trichocomaceae     | ATCC 18224        | Gp0002656 | ABAR01 | 19555  | opportunistic pathogen (dimorphic; penicilliosis)                        | 28,64   | 8,80   | 524  | 452  | 10638 | 47 Sanger                   |
| Talaromyces marneffii            | Ascomycota | Pezizomycotina | Eurotiomycetes | Eurotiomycetidae | Eurotiales | Trichocomaceae     | ATCC 18224        | Gp0002656 | ABAR01 | 19555  | opportunistic pathogen (dimorphic; penicilliosis)                        | 28,64   | 8,80   | 524  | 452  | 10638 | 47 Sanger                   |
| Talaromyces pinophilus           | Ascomycota | Pezizomycotina | Eurotiomycetes | Eurotiomycetidae | Eurotiales | Trichocomaceae     | 1-95              | Gp0144166 | LSFK01 | 310372 | industrial importance (enzyme production)                                | 36,41   | 150    | 265  | 131  |       | 46,8 illumina HiSeq         |
| Talaromyces pinophilus           | Ascomycota | Pezizomycotina | Eurotiomycetes | Eurotiomycetidae | Eurotiales | Trichocomaceae     | 1-95              | Gp0144166 | LSFK01 | 310372 | industrial importance (enzyme production)                                | 36,41   | 150,00 | 265  | 131  |       | 46,8 illumina HiSeq         |
| Talaromyces pinophilus           | Ascomycota | Pezizomycotina | Eurotiomycetes | Eurotiomycetidae | Eurotiales | Trichocomaceae     | 1-95              | Gp0144166 | LSFK01 | 310372 | industrial importance (enzyme production)                                | 36,41   | 150,00 | 265  | 131  |       | 46,8 illumina HiSeq         |
| Talaromyces purpureogenus        | Ascomycota | Pezizomycotina | Eurotiomycetes | Eurotiomycetidae | Eurotiales | Trichocomaceae     | MYA-38            | Gp0122196 | LIAB01 | 276974 | medical importance (mycotoxin-producing)                                 | 38,85   | 213    | 1150 | 1010 |       | 48,7 illumina HiSeq; PacBio |
| Talaromyces purpureogenus        | Ascomycota | Pezizomycotina | Eurotiomycetes | Eurotiomycetidae | Eurotiales | Trichocomaceae     | MYA-38            | Gp0122196 | LIAB01 | 276974 | medical importance (mycotoxin-producing)                                 | 38,85   | 213,00 | 1150 | 1010 |       | 48,7 illumina HiSeq; PacBio |
| Talaromyces purpureogenus        | Ascomycota | Pezizomycotina | Eurotiomycetes | Eurotiomycetidae | Eurotiales | Trichocomaceae     | MYA-38            | Gp0122196 | LIAB01 | 276974 | medical importance (mycotoxin-producing)                                 | 38,85   | 213,00 | 1150 | 1010 |       | 48,7 illumina HiSeq; PacBio |
| Talaromyces stipitatus           | Ascomycota | Pezizomycotina | Eurotiomycetes | Eurotiomycetidae | Eurotiales | Trichocomaceae     | ATCC 10500        | Gp0002704 | ABAS01 | 19557  | saprotroph                                                               | 35,69   | 8,1    | 896  | 820  | 13252 | 46 Sanger                   |
| Talaromyces stipitatus           | Ascomycota | Pezizomycotina | Eurotiomycetes | Eurotiomycetidae | Eurotiales | Trichocomaceae     | ATCC 10500        | Gp0002704 | ABAS01 | 19557  | saprotroph                                                               | 35,69   | 8,10   | 896  | 820  | 13252 | 46 Sanger                   |
| Talaromyces stipitatus           | Ascomycota | Pezizomycotina | Eurotiomycetes | Eurotiomycetidae | Eurotiales | Trichocomaceae     | ATCC 10500        | Gp0002704 | ABAS01 | 19557  | saprotroph                                                               | 35,69   | 8,10   | 896  | 820  | 13252 | 46 Sanger                   |
| Talaromyces verruculosus         | Ascomycota | Pezizomycotina | Eurotiomycetes | Eurotiomycetidae | Eurotiales | Trichocomaceae     | TS63-9            | Gp0124670 | LHCL01 | 291496 | industrial importance (cellulase production)                             | 37,63   | 100    | 719  | 540  | 11326 | 46,2 illumina HiSeq         |
| Talaromyces verruculosus         | Ascomycota | Pezizomycotina | Eurotiomycetes | Eurotiomycetidae | Eurotiales | Trichocomaceae     | TS63-9            | Gp0124670 | LHCL01 | 291496 | industrial importance (cellulase production)                             | 37,63   | 100,00 | 719  | 540  | 11326 | 46,2 illumina HiSeq         |
| Talaromyces verruculosus         | Ascomycota | Pezizomycotina | Eurotiomycetes | Eurotiomycetidae | Eurotiales | Trichocomaceae     | TS63-9            | Gp0124670 | LHCL01 | 291496 | industrial importance (cellulase production)                             | 37,63   | 100,00 | 719  | 540  | 11326 | 46,2 illumina HiSeq         |
| Thermomyces lanuginosus          | Ascomycota | Pezizomycotina | Eurotiomycetes | Eurotiomycetidae | Eurotiales | Trichocomaceae     | SSBP              | Gp0038902 | ANHP01 | 88097  | industrial importance (thermophile; xylanase producer)                   | 19,156  | 48,00  | 311  |      |       | 52,2 454; illumina GAI      |
| Thermomyces lanuginosus          | Ascomycota | Pezizomycotina | Eurotiomycetes | Eurotiomycetidae | Eurotiales | Trichocomaceae     | SSBP              | Gp0038902 | ANHP01 | 88097  | industrial importance (thermophile; xylanase producer)                   | 19,156  | 48,00  | 311  |      |       | 52,2 454; illumina GAI      |
| Thermomyces lanuginosus          | Ascomycota | Pezizomycotina | Eurotiomycetes | Eurotiomycetidae | Eurotiales | Trichocomaceae     | SSBP              | Gp0038902 | ANHP01 | 88097  | industrial importance (thermophile; xylanase producer)                   | 19,156  | 48,00  | 311  |      |       | 52,2 454; illumina GAI      |
| Ajellomyces dermatitidis         | Ascomycota | Pezizomycotina | Eurotiomycetes | Eurotiomycetidae | Onygenales | Ajellomycetaceae   | SLH14081          | Gp0002636 | ACBU01 | 29173  | human pathogen (blastomycosis)                                           | 75,4    | 8,45   |      | 103  |       | 36 Sanger                   |
| Ajellomyces dermatitidis         | Ascomycota | Pezizomycotina | Eurotiomycetes | Eurotiomycetidae | Onygenales | Ajellomycetaceae   | SLH14081          | Gp0002636 | ACBU01 | 29173  | human pathogen (blastomycosis)                                           | 75,4    | 8,45   |      | 103  |       | 36 Sanger                   |
| Ajellomyces dermatitidis         | Ascomycota | Pezizomycotina | Eurotiomycetes | Eurotiomycetidae | Onygenales | Ajellomycetaceae   | SLH14081          | Gp0002636 | ACBU01 | 29173  | human pathogen (blastomycosis)                                           | 75,4    | 8,45   |      | 103  |       | 36 Sanger                   |
| Emmonsia crescens                | Ascomycota | Pezizomycotina | Eurotiomycetes | Eurotiomycetidae | Onygenales | Ajellomycetaceae   | UAMH 3008         | Gp0037041 | LCZIO1 | 178252 | occasional human pathogen (dimorphic)                                    | 30,7    | 163,00 | 2489 | 1734 | 9558  | 45,2                        |
| Emmonsia crescens                | Ascomycota | Pezizomycotina | Eurotiomycetes | Eurotiomycetidae | Onygenales | Ajellomycetaceae   | UAMH 3008         | Gp0037041 | LCZIO1 | 178252 | occasional human pathogen (dimorphic)                                    | 30,7    | 163,00 | 2489 | 1734 | 9558  | 45,2                        |
| Emmonsia parva                   | Ascomycota | Pezizomycotina | Eurotiomycetes | Eurotiomycetidae | Onygenales | Ajellomycetaceae</ |                   |           |        |        |                                                                          |         |        |      |      |       |                             |



|                             |            |                 |                 |                       |                |                 |                   |           |         |        |                                                              |        |         |       |       |       |      |                        |
|-----------------------------|------------|-----------------|-----------------|-----------------------|----------------|-----------------|-------------------|-----------|---------|--------|--------------------------------------------------------------|--------|---------|-------|-------|-------|------|------------------------|
| Phaeoconiella chlamydospora | Ascomycota | Peizizomycotina | Eurotiomycetes  | Chaetothyriomycetidae | Phaeoconiales  | Uncertae sedis  | UCRPC4            | Gp0118145 | LCWF01  | 261774 | plant pathogen (grapevine trunk disease)                     | 27,51  | 107,28  | 917   | 702   | 6907  | 47   | illumina HiSeq         |
| Phaeoconiella chlamydospora | Ascomycota | Peizizomycotina | Eurotiomycetes  | Chaetothyriomycetidae | Phaeoconiales  | Uncertae sedis  | UCRPC4            | Gp0118145 | LCWF01  | 261774 | plant pathogen (grapevine trunk disease)                     | 27,51  | 107,28  | 917   | 702   | 6907  | 47   | illumina HiSeq         |
| Endocarpon pusillum         | Ascomycota | Peizizomycotina | Eurotiomycetes  | Chaetothyriomycetidae | Verrucariales  | Verrucariaceae  | Z07020            | Gp0048200 | APWS01  | 181958 | mycobiont (lichen-forming)                                   | 37,5   | 78,00   | 1731  | 908   | 9285  | 46   | 454; illumina GAlIx    |
| Endocarpon pusillum         | Ascomycota | Peizizomycotina | Eurotiomycetes  | Chaetothyriomycetidae | Verrucariales  | Verrucariaceae  | Z07020            | Gp0048200 | APWS01  | 181958 | mycobiont (lichen-forming)                                   | 37,5   | 78,00   | 1731  | 908   | 9285  | 46   | 454; illumina GAlIx    |
| Symbiotaphrina buchneri     | Ascomycota | Peizizomycotina | Uncertae sedis  | Incertae sedis        | Incertae sedis | Incertae sedis  | JCM 9740          | Gp0144048 | BCIG01  | 313832 | insect-associated (beetle endosymbiont)                      | 23,71  | 251,00  | 211   | 169   |       | 51,6 | HiSeq 2500             |
| Symbiotaphrina buchneri     | Ascomycota | Peizizomycotina | Uncertae sedis  | Incertae sedis        | Incertae sedis | Incertae sedis  | JCM 9740          | Gp0144048 | BCIG01  | 313832 | insect-associated (beetle endosymbiont)                      | 23,71  | 251,00  | 211   | 169   |       | 51,6 | HiSeq 2500             |
| Symbiotaphrina kochii       | Ascomycota | Peizizomycotina | Uncertae sedis  | Incertae sedis        | Incertae sedis | Incertae sedis  | CBS 250.77        | Gp0010144 |         | 207854 | insect-associated (beetle endosymbiont)                      | 24,83  | 69,00   | 59    | 54    | 10482 | 454; | illumina               |
| Symbiotaphrina kochii       | Ascomycota | Peizizomycotina | Uncertae sedis  | Incertae sedis        | Incertae sedis | Incertae sedis  | CBS 250.77        | Gp0010144 |         | 207854 | insect-associated (beetle endosymbiont)                      | 24,83  | 69,00   | 59    | 54    | 10482 | 454; | illumina               |
| Cladonia grayi              | Ascomycota | Peizizomycotina | Lecanoromycetes | Lecanoromycetidae     | Lecanorales    | Cladoniaceae    | Cgr/DA2myc/ss     |           | JGI     |        | mycobiont (lichen-forming)                                   | 39,6   |         | 5214  | 1506  | 11415 | 454; | illumina               |
| Cladonia grayi              | Ascomycota | Peizizomycotina | Lecanoromycetes | Lecanoromycetidae     | Lecanorales    | Cladoniaceae    | Cgr/DA2myc/ss     |           | JGI     |        | mycobiont (lichen-forming)                                   | 39,6   |         | 5214  | 1506  | 11415 | 454; | illumina               |
| Cladonia macilenta          | Ascomycota | Peizizomycotina | Lecanoromycetes | Lecanoromycetidae     | Lecanorales    | Cladoniaceae    | KoLRIO03786       | Gp0042523 | AUPP01  | 210603 | mycobiont (lichen-forming)                                   | 37,12  | 540,00  | 1310  | 240   |       | 44,8 | illumina               |
| Cladonia macilenta          | Ascomycota | Peizizomycotina | Lecanoromycetes | Lecanoromycetidae     | Lecanorales    | Cladoniaceae    | KoLRIO03786       | Gp0042523 | AUPP01  | 210603 | mycobiont (lichen-forming)                                   | 37,12  | 540,00  | 1310  | 240   |       | 44,8 | illumina               |
| Cladonia metacorallifera    | Ascomycota | Peizizomycotina | Lecanoromycetes | Lecanoromycetidae     | Lecanorales    | Cladoniaceae    | KoLRIO02260       | Gp0049795 | AXCT02  | 219240 | mycobiont (lichen-forming)                                   | 36,68  | 1023,00 | 625   | 30    |       | 45   | illumina               |
| Cladonia metacorallifera    | Ascomycota | Peizizomycotina | Lecanoromycetes | Lecanoromycetidae     | Lecanorales    | Cladoniaceae    | KoLRIO02260       | Gp0049795 | AXCT02  | 219240 | mycobiont (lichen-forming)                                   | 36,68  | 1023,00 | 625   | 30    |       | 45   | illumina               |
| Usnea florida               | Ascomycota | Peizizomycotina | Lecanoromycetes | Lecanoromycetidae     | Lecanorales    | Parmeliaceae    | ATCC18376 v1.0    |           | 10S1215 |        | mycobiont (lichen-forming)                                   | 44,32  | 87,6    | 1774  | 274   | 12649 |      | illumina               |
| Usnea florida               | Ascomycota | Peizizomycotina | Lecanoromycetes | Lecanoromycetidae     | Lecanorales    | Parmeliaceae    | ATCC18376 v1.0    |           | 10S1215 |        | mycobiont (lichen-forming)                                   | 44,32  | 87,6    | 1774  | 274   | 12649 |      | illumina               |
| Gyalolechia flavorubescens  | Ascomycota | Peizizomycotina | Lecanoromycetes | Lecanoromycetidae     | Lecanorales    | Teloschistales  | KoLRIO02931       | Gp0047051 | AUPK01  | 210248 | mycobiont (lichen-forming)                                   | 34,468 | 541,00  | 189   | 36    |       | 42   | illumina HiSeq         |
| Gyalolechia flavorubescens  | Ascomycota | Peizizomycotina | Lecanoromycetes | Lecanoromycetidae     | Lecanorales    | Teloschistales  | KoLRIO02931       | Gp0047051 | AUPK01  | 210248 | mycobiont (lichen-forming)                                   | 34,468 | 541,00  | 189   | 36    |       | 42   | illumina HiSeq         |
| Xanthoria parietina         | Ascomycota | Peizizomycotina | Lecanoromycetes | Lecanoromycetidae     | Teloschistales | Teloschistaceae | 46-1              | Gp0017906 | JGI     | 62697  | mycobiont (lichen-forming)                                   | 31,9   | 43,84   | 302   | 39    | 10818 |      | 454                    |
| Xanthoria parietina         | Ascomycota | Peizizomycotina | Lecanoromycetes | Lecanoromycetidae     | Teloschistales | Teloschistaceae | 46-1              | Gp0017906 | JGI     | 62697  | mycobiont (lichen-forming)                                   | 31,9   | 43,84   | 302   | 39    | 10818 |      | 454                    |
| Lasallia pustulata          | Ascomycota | Peizizomycotina | Lecanoromycetes | Incertae sedis        | Umbilicariales | Umbilicariaceae | Sardinia_28052013 | Gp0138618 | JYI01   | 275184 | mycobiont (lichen-forming)                                   | 39,23  | 90,00   | 5331  | 3891  |       | 51,2 | PacBio; illumina HiSeq |
| Lasallia pustulata          | Ascomycota | Peizizomycotina | Lecanoromycetes | Incertae sedis        | Umbilicariales | Umbilicariaceae | Sardinia_28052013 | Gp0138618 | JYI01   | 275184 | mycobiont (lichen-forming)                                   | 39,23  | 90,00   | 5331  | 3891  |       | 51,2 | PacBio; illumina HiSeq |
| Umbilicaria muehlenbergii   | Ascomycota | Peizizomycotina | Lecanoromycetes | Incertae sedis        | Umbilicariales | Umbilicariaceae | Gp0090033         | JFDN01    |         | 239196 | mycobiont (lichen-forming); genetically tractable            | 34,812 | 663,00  | 297   | 7     |       | 47,1 | illumina HiSeq         |
| Umbilicaria muehlenbergii   | Ascomycota | Peizizomycotina | Lecanoromycetes | Incertae sedis        | Umbilicariales | Umbilicariaceae | Gp0090033         | JFDN01    |         | 239196 | mycobiont (lichen-forming); genetically tractable            | 34,812 | 663,00  | 297   | 7     |       | 47,1 | illumina HiSeq         |
| Blumeria graminis           | Ascomycota | Peizizomycotina | Leotiomycetes   | Leotiomycetidae       | Erysiphales    | Erysiphaceae    | A6                | Gp0038457 | AOLT01  | 186717 | plant pathogen (mildew on grasses and cereals)               | 47,46  | 70,00   | 21305 |       | 7088  | 46,4 | 454; illumina HiSeq    |
| Blumeria graminis           | Ascomycota | Peizizomycotina | Leotiomycetes   | Leotiomycetidae       | Erysiphales    | Erysiphaceae    | A6                | Gp0038457 | AOLT01  | 186717 | plant pathogen (mildew on grasses and cereals)               | 47,46  | 70,00   | 21305 |       | 7088  | 46,4 | 454; illumina HiSeq    |
| Erysiphe necator            | Ascomycota | Peizizomycotina | Leotiomycetes   | Leotiomycetidae       | Erysiphales    | Erysiphaceae    | branching         | Gp0117742 | JNUS01  | 248900 | plant pathogen (powdery mildew of grape)                     | 50,66  | 29,00   | 11631 | 6224  | 6484  | 39   | illumina HiSeq         |
| Erysiphe necator            | Ascomycota | Peizizomycotina | Leotiomycetes   | Leotiomycetidae       | Erysiphales    | Erysiphaceae    | branching         | Gp0117742 | JNUS01  | 248900 | plant pathogen (powdery mildew of grape)                     | 50,66  | 29,00   | 11631 | 6224  | 6484  | 39   | illumina HiSeq         |
| Erysiphe pisi               | Ascomycota | Peizizomycotina | Leotiomycetes   | Leotiomycetidae       | Erysiphales    | Erysiphaceae    | not specified     | Gp0008359 | CACN01  | 50315  | plant pathogen (powdery mildew of pea)                       | 41     | 8,30    | 26142 |       |       | 39,2 | 454                    |
| Erysiphe pisi               | Ascomycota | Peizizomycotina | Leotiomycetes   | Leotiomycetidae       | Erysiphales    | Erysiphaceae    | not specified     | Gp0008359 | CACN01  | 50315  | plant pathogen (powdery mildew of pea)                       | 41     | 8,30    | 26142 |       |       | 39,2 | 454                    |
| Marssonina brunnea          | Ascomycota | Peizizomycotina | Leotiomycetes   | Leotiomycetidae       | Helotiales     | Dermateaceae    | MB_m1             | Gp0038386 | AFXC01  | 66127  | plant pathogen (poplar leaf spot)                            | 51,949 | 34,00   | 2415  | 89    | 10027 | 42,9 | 454; Sanger            |
| Marssonina brunnea          | Ascomycota | Peizizomycotina | Leotiomycetes   | Leotiomycetidae       | Helotiales     | Dermateaceae    | MB_m1             | Gp0038386 | AFXC01  | 66127  | plant pathogen (poplar leaf spot)                            | 51,949 | 34,00   | 2415  | 89    | 10027 | 42,9 | 454; Sanger            |
| Ascoconyze sarcoides        | Ascomycota | Peizizomycotina | Leotiomycetes   | Leotiomycetidae       | Helotiales     | Dermateaceae    | NRRL 50072        | Gp0039091 | AIAA01  | 71021  | pharmaceutical importance (antibiotic-producing); saprotroph | 34,2   | 250     | 219   | 13    |       |      | 454                    |
| Ascoconyze sarcoides        | Ascomycota | Peizizomycotina | Leotiomycetes   | Leotiomycetidae       | Helotiales     | Dermateaceae    | NRRL 50072        | Gp0039091 | AIAA01  | 71021  | pharmaceutical importance (antibiotic-producing); saprotroph | 34,2   | 250     | 219   | 13    |       |      | 454                    |
| Glarea lozoyensis           | Ascomycota | Peizizomycotina | Leotiomycetes   | Leotiomycetidae       | Helotiales     | Helotiaceae     | 74030             | Gp0020666 | AGUE01  | 74639  | pharmaceutical importance (produces antifungal compounds)    | 38,718 | 34,40   | 880   | 581   | 13083 | 46   | illumina HiSeq         |
| Glarea lozoyensis           | Ascomycota | Peizizomycotina | Leotiomycetes   | Leotiomycetidae       | Helotiales     | Helotiaceae     | 74030             | Gp0020666 | AGUE01  | 74639  | pharmaceutical importance (produces antifungal compounds)    | 38,718 | 34,40   | 880   | 581   | 13083 | 46   | illumina HiSeq         |
| Hymenoscyphus fraxineus     | Ascomycota | Peizizomycotina | Leotiomycetes   | Leotiomycetidae       | Helotiales     | Helotiaceae     | CBS 133217        | Gp0124450 | LLCC01  | 297734 | plant pathogen (ash dieback)                                 | 51,52  | 90,00   | 4749  |       |       | 43,7 | illumina HiSeq         |
| Hymenoscyphus fraxineus     | Ascomycota | Peizizomycotina | Leotiomycetes   | Leotiomycetidae       | Helotiales     | Helotiaceae     | CBS 133217        | Gp0124450 | LLCC01  | 297734 | plant pathogen (ash dieback)                                 | 51,52  | 90,00   | 4749  |       |       | 43,7 | illumina HiSeq         |
| Hymenoscyphus fructigenus   | Ascomycota | Peizizomycotina | Leotiomycetes   | Leotiomycetidae       | Helotiales     | Helotiaceae     | CBS 650.92        | Gp0124451 | LKUV01  | 298282 | saprotroph                                                   | 61,12  | 400,00  | 504   |       |       | 43,1 | illumina HiSeq         |
| Hymenoscyphus fructigenus   | Ascomycota | Peizizomycotina | Leotiomycetes   | Leotiomycetidae       | Helotiales     | Helotiaceae     | CBS 650.92        | Gp0124451 | LKUV01  | 298282 | saprotroph                                                   | 61,12  | 400,00  | 504   |       |       | 43,1 | illumina HiSeq         |
| Hymenoscyphus infarciens    | Ascomycota | Peizizomycotina | Leotiomycetes   | Leotiomycetidae       | Helotiales     | Helotiaceae     | CBS 122016        | Gp0124452 | LLCB01  | 297733 | saprotroph                                                   | 68,15  | 250,00  | 1714  |       |       | 37,6 | illumina HiSeq         |
| Hymenoscyphus infarciens    | Ascomycota | Peizizomycotina | Leotiomycetes   | Leotiomycetidae       | Helotiales     | Helotiaceae     | CBS 122016        | Gp0124452 | LLCB01  | 297733 | saprotroph                                                   | 68,15  | 250,00  | 1714  |       |       | 37,6 | illumina HiSeq         |
| Hymenoscyphus laetus        | Ascomycota | Peizizomycotina | Leotiomycetes   | Leotiomycetidae       | Helotiales     | Helotiaceae     | CBS 340.76        | Gp0124448 | LLCA01  | 297728 | saprotroph                                                   | 36,47  | 140,00  | 1714  |       |       | 51,9 | illumina HiSeq         |
| Hymenoscyphus laetus        | Ascomycota | Peizizomycotina | Leotiomycetes   | Leotiomycetidae       | Helotiales     | Helotiaceae     | CBS 340.76        | Gp0124448 | LLCA01  | 297728 | saprotroph                                                   | 36,47  | 140,00  | 1714  |       |       | 51,9 | illumina HiSeq         |
| Hymenoscyphus repandus      | Ascomycota | Peizizomycotina | Leotiomycetes   | Leotiomycetidae       | Helotiales     | Helotiaceae     | CBS 341.76        | Gp0124456 | LLCE01  | 297738 | saprotroph                                                   | 42,81  | 50,00   | 925   |       |       | 46,6 | illumina HiSeq         |
| Hymenoscyphus repandus      | Ascomycota | Peizizomycotina | Leotiomycetes   | Leotiomycetidae       | Helotiales     | Helotiaceae     | CBS 341.76        | Gp0124456 | LLCE01  | 297738 | saprotroph                                                   | 42,81  | 50,00   | 925   |       |       | 46,6 | illumina HiSeq         |
| Hymenoscyphus salicellus    | Ascomycota | Peizizomycotina | Leotiomycetes   | Leotiomycetidae       | Helotiales     | Helotiaceae     | CBS 111550        | Gp0124453 | LLCD01  | 297737 | saprotroph                                                   | 57,95  | 30,00   |       |       |       | 44,4 | illumina HiSeq         |
| Hymenoscyphus salicellus    | Ascomycota | Peizizomycotina | Leotiomycetes   | Leotiomycetidae       | Helotiales     | Helotiaceae     | CBS 111550        | Gp0124453 | LLCD01  | 297737 | saprotroph                                                   | 57,95  | 30,00   |       |       |       | 44,4 | illumina HiSeq         |
| Hymenoscyphus scutula       | Ascomycota | Peizizomycotina | Leotiomycetes   | Leotiomycetidae       | Helotiales     | Helotiaceae     | CBS 480.97        | Gp0124454 | LKTO01  | 297978 | saprotroph                                                   | 62,23  | 100,00  | 2591  |       |       | 41,1 | illumina HiSeq         |
| Hymenoscyphus scutula       | Ascomycota | Peizizomycotina | Leotiomycetes   | Leotiomycetidae       | Helotiales     | Helotiaceae     | CBS 480.97        | Gp0124454 | LKTO01  | 297978 | saprotroph                                                   | 62,23  | 100,00  | 2591  |       |       | 41,1 | illumina HiSeq         |
| Meliniomyces bicolor        | Ascomycota | Peizizomycotina | Leotiomycetes   | Leotiomycetidae       | Helotiales     | Helotiaceae     | E                 | Gp0009599 | JGI     | 196026 | mycorrhizal                                                  | 82,38  | 190,6   | 301   | 206   | 18619 |      | illumina HiSeq         |
| Meliniomyces bicolor        | Ascomycota | Peizizomycotina | Leotiomycetes   | Leotiomycetidae       | Helotiales     | Helotiaceae     | E                 | Gp0009599 | JGI     | 196026 | mycorrhizal                                                  | 82,38  | 190,6   | 301   | 206   | 18619 |      | illumina HiSeq         |
| Meliniomyces variabilis     | Ascomycota | Peizizomycotina | Leotiomycetes   | Leotiomycetidae       | Helotiales     | Helotiaceae     | F                 | Gp0019251 | JGI     | 200595 | mycorrhizal                                                  | 55,86  | 108,4   | 272   | 93    | 20389 |      | illumina HiSeq         |
| Meliniomyces variabilis     | Ascomycota | Peizizomycotina | Leotiomycetes   | Leotiomycetidae       | Helotiales     | Helotiaceae     | F                 | Gp0019251 | JGI     | 200595 | mycorrhizal                                                  | 55,86  | 108,4   | 272   | 93    | 20389 |      | illumina HiSeq         |
| Rhizoscyphus ericae         | Ascomycota | Peizizomycotina | Leotiomycetes   | Leotiomycetidae       | Helotiales     | Helotiaceae     | UAMH 7357         | Gp0019396 | 1006265 | 263050 | mycorrhizal (ericoid)                                        | 57,41  | 120,90  | 1025  | 267   | 16784 |      | illumina HiSeq         |
| Rhizoscyphus ericae         | Ascomycota | Peizizomycotina | Leotiomycetes   | Leotiomycetidae       | Helotiales     | Helotiaceae     | UAMH 7357         | Gp0019396 | 1006265 | 263050 | mycorrhizal (ericoid)                                        | 57,41  | 120,90  | 1025  | 267   | 16784 |      | illumina HiSeq         |
| Calycina herbarum           | Ascomycota | Peizizomycotina | Leotiomycetes   | Leotiomycetidae       | Helotiales     | Hyaloscyphaceae | CBS 466.73        | Gp0124449 | LLEY01  | 298390 | uncertain saprotroph                                         | 69,31  | 300,00  | 529   |       |       | 41,7 | illumina HiSeq         |
| Calycina herbarum           | Ascomycota | Peizizomycotina | Leotiomycetes   | Leotiomycetidae       | Helotiales     | Hyaloscyphaceae | CBS 466.73        | Gp0124449 | LLEY01  | 298390 | uncertain saprotroph                                         | 69,31  | 300,00  | 529   |       |       | 41,7 | illumina HiSeq         |
| Acephala macrosclerotiorum  | Ascomycota | Peizizomycotina | Leotiomycetes   | Leotiomycetidae       | Helotiales     | Uncertae sedis  | EW76-UTF0540 v1.0 |           | 1034881 |        | ectomycorrhizal                                              | 73,68  | 141,30  | 1901  | 1695  | 21024 |      | illumina               |
| Acephala macrosclerotiorum  | Ascomycota | Peizizomycotina | Leotiomycetes   | Leotiomycetidae       | Helotiales     | Uncertae sedis  | EW76-UTF0540 v1.0 |           | 1034881 |        | ectomycorrhizal                                              | 73,68  | 141,30  | 1901  | 1695  | 21024 |      | illumina               |
| Cadophora sp. DSE1049       | Ascomycota | Peizizomycotina | Leotiomycetes   | Leotiomycetidae       | Helotiales     | Incertae sedis  | DSE1049           | Gp0046557 | JGI     | 243951 | endophyte (grasslands)                                       | 70,46  | 79,2    | 1294  | 1193  | 22766 |      | illumina HiSeq         |
| Cadophora sp. DSE1049       | Ascomycota | Peizizomycotina | Leotiomycetes   | Leotiomycetidae       | Helotiales     | Incertae sedis  | DSE1049           | Gp0046557 | JGI     | 243951 | endophyte (grasslands)                                       | 70,46  | 79,2    | 1294  | 1193  | 22766 |      | illumina HiSeq         |
| Cairneyella heathii         | Ascomycota | Peizizomycotina | Leotiomycetes   | Leotiomycetidae       | Helotiales     | Incertae sedis  | VPRI 42388        | Gp0067908 | AYLM01  | 225634 | mycorrhizal                                                  | 50,69  | 20,00   | 3371  | 50,69 |       |      |                        |
| Chalara longipes            | Ascomycota | Peizizomycotina | Leotiomycetes   | Leotiomycetidae       | Helotiales     | Incertae sedis  | BDJ               | Gp0019347 | JGI     | 213334 | saprotroph                                                   | 52,43  | 104,7   | 175   | 54    | 19765 |      | illumina               |
| Chalara longipes            | Ascomycota | Peizizomycotina | Leotiomycetes   | Leotiomycetidae       | Helotiales     | Incertae sedis  | BDJ               | Gp0019347 | JGI     | 213334 | saprotroph                                                   | 52,43  | 104,7   | 175   | 54    | 19765 |      | illumina               |
| Leptodontium sp.            | As         |                 |                 |                       |                |                 |                   |           |         |        |                                                              |        |         |       |       |       |      |                        |

|                                  |            |               |                 |                    |                   |                      |                 |           |                |                                                          |         |        |       |      |      |       |                                 |                        |
|----------------------------------|------------|---------------|-----------------|--------------------|-------------------|----------------------|-----------------|-----------|----------------|----------------------------------------------------------|---------|--------|-------|------|------|-------|---------------------------------|------------------------|
| Drechlerella stenobrocha         | Ascomycota | Peizomycotina | Orbiliomycetes  | Orbiliomycetidae   | Orbiliales        | Orbiliaceae          | YNWS02-9-1      | Gp0005661 |                | biocontrol (nematophagous)                               | 29,02   | 80,00  |       |      | 142  | 7781  | Illumina                        |                        |
| Drechlerella stenobrocha         | Ascomycota | Peizomycotina | Orbiliomycetes  | Orbiliomycetidae   | Orbiliales        | Orbiliaceae          | YNWS02-9-1      | Gp0005661 |                | biocontrol (nematophagous)                               | 29,02   | 80,00  |       |      | 142  | 7781  | Illumina                        |                        |
| Ascobolus immersus               | Ascomycota | Peizomycotina | Peizomyces      | Peizomycetidae     | Peiziales         | Ascobolaceae         | RN42            | Gp0017640 | JGI            | 250965 coprophilous                                      | 59,53   | 86,3   | 1225  |      | 706  | 17877 | Illumina HiSeq                  |                        |
| Ascobolus immersus               | Ascomycota | Peizomycotina | Peizomyces      | Peizomycetidae     | Peiziales         | Ascobolaceae         | RN42            | Gp0017640 | JGI            | 250965 coprophilous                                      | 59,53   | 86,30  | 1225  |      | 706  | 17877 | Illumina HiSeq                  |                        |
| Ascodesmis nigricans             | Ascomycota | Peizomycotina | Peizomyces      | Peizomycetidae     | Peiziales         | Ascodesmidaceae      | CBS 389.68      | Gp0090695 |                | 247594 coprophilous                                      | 27,39   | 96,90  |       |      | 407  | 9622  | Illumina                        |                        |
| Caloscypha fulgens               | Ascomycota | Peizomycotina | Peizomyces      | Peizomycetidae     | Peiziales         | Caloscyphaeae        | ATCC 42695 v1.0 |           |                | 1052670 plant pathogen (seed rot of conifers)            | 44,84   |        |       |      | 405  | 9203  | Illumina                        |                        |
| Caloscypha fulgens               | Ascomycota | Peizomycotina | Peizomyces      | Peizomycetidae     | Peiziales         | Caloscyphaeae        | ATCC 42695 v1.0 |           |                | 1052670 plant pathogen (seed rot of conifers)            | 44,84   |        |       |      | 405  | 9203  | Illumina                        |                        |
| Gyromitra esculenta              | Ascomycota | Peizomycotina | Peizomyces      | Peizomycetidae     | Peiziales         | Discinaceae          | CBS101906 v1.0  |           |                | 1051239 saprotroph                                       | 45,05   | 83,6   | 774   |      | 271  | 11202 | Illumina                        |                        |
| Gyromitra esculenta              | Ascomycota | Peizomycotina | Peizomyces      | Peizomycetidae     | Peiziales         | Discinaceae          | CBS101906 v1.0  |           |                | 1051239 saprotroph                                       | 45,05   | 83,60  | 774   |      | 271  | 11202 | Illumina                        |                        |
| Morchella conica                 | Ascomycota | Peizomycotina | Peizomyces      | Peizomycetidae     | Peiziales         | Morchellaceae        | CCBAS932        | Gp0044465 | JGI            | 217205 mycorrhizal; saprotroph                           | 48,21   | 67,80  | 1793  |      | 540  | 11600 | Illumina HiSeq                  |                        |
| Morchella conica                 | Ascomycota | Peizomycotina | Peizomyces      | Peizomycetidae     | Peiziales         | Morchellaceae        | CCBAS932        | Gp0044465 | JGI            | 217205 mycorrhizal; saprotroph                           | 48,21   | 67,80  | 1793  |      | 540  | 11600 | Illumina HiSeq                  |                        |
| Morchella importuna              | Ascomycota | Peizomycotina | Peizomyces      | Peizomycetidae     | Peiziales         | Morchellaceae        | SCYD11-A1 v1.0  |           |                | 1047733 saprotroph; edible                               | 48,8    | 83,9   | 1509  |      | 338  | 11971 | Illumina                        |                        |
| Morchella importuna              | Ascomycota | Peizomycotina | Peizomyces      | Peizomycetidae     | Peiziales         | Morchellaceae        | SCYD11-A1 v1.0  |           |                | 1047733 saprotroph; edible                               | 48,8    | 83,90  | 1509  |      | 338  | 11971 | Illumina                        |                        |
| Kalaharituber Pfeilli            | Ascomycota | Peizomycotina | Peizomyces      | Peizomycetidae     | Peiziales         | Pezizaceae           | F3 v1.0         |           |                | 1060175 mycorrhizal; edible desert truffle               | 78,99   |        |       |      | 595  | 15190 | PacBio                          |                        |
| Kalaharituber Pfeilli            | Ascomycota | Peizomycotina | Peizomyces      | Peizomycetidae     | Peiziales         | Pezizaceae           | F3 v1.0         |           |                | 1060175 mycorrhizal; edible desert truffle               | 78,99   |        |       |      | 595  | 15190 | PacBio                          |                        |
| Terfezia boudieri                | Ascomycota | Peizomycotina | Peizomyces      | Peizomycetidae     | Peiziales         | Pezizaceae           | S1              | Gp0009600 | JGI            | 200599 mycorrhizal                                       | 63,23   | 104,4  | 2078  |      | 516  | 10200 | 454; Illumina; PacBio           |                        |
| Terfezia boudieri                | Ascomycota | Peizomycotina | Peizomyces      | Peizomycetidae     | Peiziales         | Pezizaceae           | S1              | Gp0009600 | JGI            | 200599 mycorrhizal                                       | 63,23   | 104,40 | 2078  |      | 516  | 10200 | 454; Illumina; PacBio           |                        |
| Pyronema confluens               | Ascomycota | Peizomycotina | Peizomyces      | Peizomycetidae     | Peiziales         | Pyronemataceae       | CBS 100304      | Gp0035318 | CATG00000000   | 65573 saprotroph (soil)                                  | 50,03   |        | 1865  |      | 1588 | 13367 | 48 454; Illumina HiSeq          |                        |
| Pyronema confluens               | Ascomycota | Peizomycotina | Peizomyces      | Peizomycetidae     | Peiziales         | Pyronemataceae       | CBS 100304      | Gp0035318 | CATG00000000   | 65573 saprotroph (soil)                                  | 50,03   |        | 1865  |      | 1588 | 13367 | 48 454; Illumina HiSeq          |                        |
| Ramularia collo-cygni            | Ascomycota | Peizomycotina | Peizomyces      | Peizomycetidae     | Peiziales         | Pyronemataceae       | Gs0120586       | CZLF01    |                | 306455 plant pathogen (barley)                           | 30,3    | 90,00  | 832   |      | 576  | 11617 | 51,4                            |                        |
| Ramularia collo-cygni            | Ascomycota | Peizomycotina | Peizomyces      | Peizomycetidae     | Peiziales         | Pyronemataceae       | Gs0120586       | CZLF01    |                | 306455 plant pathogen (barley)                           | 30,3    | 90,00  | 832   |      | 576  | 11617 | 51,4                            |                        |
| Wilcoxina mikolae                | Ascomycota | Peizomycotina | Peizomyces      | Peizomycetidae     | Peiziales         | Pyronemataceae       | CBS 423.85      | Gp0035338 | JGI            | 196022 ectomycorrhizal                                   | 117,29  |        | 95    |      | 5591 | 1604  | 13093                           | Illumina HiSeq; PacBio |
| Wilcoxina mikolae                | Ascomycota | Peizomycotina | Peizomyces      | Peizomycetidae     | Peiziales         | Pyronemataceae       | CBS 423.85      | Gp0035338 | JGI            | 196022 ectomycorrhizal                                   | 117,29  |        | 95    |      | 5591 | 1604  | 13093                           | Illumina HiSeq; PacBio |
| Sarcoscypha coccinea             | Ascomycota | Peizomycotina | Peizomyces      | Peizomycetidae     | Peiziales         | Sarcoscyphaeae       | ATCC 58028 v1.0 |           |                | 1042915 saprotroph                                       | 39,09   | 95,9   | 1481  |      | 461  | 13738 | Illumina                        |                        |
| Sarcoscypha coccinea             | Ascomycota | Peizomycotina | Peizomyces      | Peizomycetidae     | Peiziales         | Sarcoscyphaeae       | ATCC 58028 v1.0 |           |                | 1042915 saprotroph                                       | 39,09   | 95,90  | 1481  |      | 461  | 13738 | Illumina                        |                        |
| Plectania melastoma              | Ascomycota | Peizomycotina | Peizomyces      | Peizomycetidae     | Peiziales         | Sarcosomataceae      | CBS 918.72 v1.0 |           |                | 1040543 saprotroph                                       | 92,51   | 72,3   | 504   |      | 175  | 16180 | Illumina                        |                        |
| Plectania melastoma              | Ascomycota | Peizomycotina | Peizomyces      | Peizomycetidae     | Peiziales         | Sarcosomataceae      | CBS 918.72 v1.0 |           |                | 1040543 saprotroph                                       | 92,51   | 72,30  | 504   |      | 175  | 16180 | Illumina                        |                        |
| Choioomyces venosus              | Ascomycota | Peizomycotina | Peizomyces      | Peizomycetidae     | Peiziales         | Tuberaceae           | 120613-1        | Gp0035337 | JGI            | 204096 ectomycorrhizal                                   | 126,04  |        | 89,5  | 3183 | 1176 | 17986 | Illumina; PacBio                |                        |
| Choioomyces venosus              | Ascomycota | Peizomycotina | Peizomyces      | Peizomycetidae     | Peiziales         | Tuberaceae           | 120613-1        | Gp0035337 | JGI            | 204096 ectomycorrhizal                                   | 126,04  |        | 89,50 | 3183 | 1176 | 17986 | Illumina; PacBio                |                        |
| Tuber borchii                    | Ascomycota | Peizomycotina | Peizomyces      | Peizomycetidae     | Peiziales         | Tuberaceae           | Tbo3840         | Gp0002708 |                | 1034997 ectomycorrhizal                                  | 97,18   | 97,00  | 969   |      | 969  | 12346 | PacBio                          |                        |
| Tuber melanosporum               | Ascomycota | Peizomycotina | Peizomyces      | Peizomycetidae     | Peiziales         | Tuberaceae           | Mel28           | Gp0002709 | CABJ01         | 38847 ectomycorrhizal (edible delicacy)                  | 124,945 | 10,00  | 4440  |      | 398  | 7496  | 45 Sanger                       |                        |
| Tuber melanosporum               | Ascomycota | Peizomycotina | Peizomyces      | Peizomycetidae     | Peiziales         | Tuberaceae           | Mel28           | Gp0002709 | CABJ01         | 38847 ectomycorrhizal (edible delicacy)                  | 124,945 | 10,00  | 4440  |      | 398  | 7496  | 45 Sanger                       |                        |
| Microdochium bolleyi             | Ascomycota | Peizomycotina | Sordariomycetes | Yliariomycetidae   | Amphisphaeriales  | Incertae sedis       | J235TASD1       | Gp0113784 | LSSP01         | 308023 endophyte                                         | 38,84   | 136,20 | 262   |      | 173  | 13165 | 57,1 HiSeq 2500                 |                        |
| Pestalotiopsis fici              | Ascomycota | Peizomycotina | Sordariomycetes | Yliariomycetidae   | Amphisphaeriales  | Pestalotiopsidaceae  | W106-1          | Gp0038703 | ARNU01         | 174299 endophyte                                         | 51,91   | 80,00  | 518   |      | 39   | 15413 | 52 454; Illumina HiSeq          |                        |
| Pestalotiopsis sp. JCM 9685      | Ascomycota | Peizomycotina | Sordariomycetes | Yliariomycetidae   | Amphisphaeriales  | Pestalotiopsidaceae  | JCM 9685        | Gp0149822 | BCGF01         | 313890 endophyte (Taxus brevifolia)                      | 48,23   | 235,00 | 130   |      | 13   |       | 51,6 Illumina                   |                        |
| Thozetella sp. PML_491           | Ascomycota | Peizomycotina | Sordariomycetes | Sordariomycetidae  | Chaetosphaeriales | Chaetosphaeriaceae   | PML_491         | Gp0039995 | JGI            | 251777 endophyte                                         | 72,86   | 112,6  | 627   |      | 194  | 23281 | Illumina HiSeq                  |                        |
| Thozetella sp. PML_491           | Ascomycota | Peizomycotina | Sordariomycetes | Sordariomycetidae  | Chaetosphaeriales | Chaetosphaeriaceae   | PML_491         | Gp0039995 | JGI            | 251777 endophyte                                         | 72,86   | 112,60 | 627   |      | 194  | 23281 | Illumina HiSeq                  |                        |
| Coniochaeta ligniaria            | Ascomycota | Peizomycotina | Sordariomycetes | Diaporthomycetidae | Coniochaetales    | Coniochaetaeae       | NRRL 30616      | Gp0036825 | JGI            | 223108 industrial importance                             | 42,38   | 94,40  | 230   |      | 135  | 13657 | Illumina HiSeq                  |                        |
| Coniochaeta ligniaria            | Ascomycota | Peizomycotina | Sordariomycetes | Diaporthomycetidae | Coniochaetales    | Coniochaetaeae       | NRRL 30616      | Gp0036825 | JGI            | 223108 industrial importance                             | 42,38   | 94,40  | 230   |      | 135  | 13657 | Illumina HiSeq                  |                        |
| Coniochaeta sp. PML_546          | Ascomycota | Peizomycotina | Sordariomycetes | Diaporthomycetidae | Coniochaetales    | Coniochaetaeae       | PML_546         | Gp0039950 | JGI            | 234867 endophyte (root); saprotroph                      | 33,51   | 102    | 68    |      | 37   | 11346 | Illumina HiSeq                  |                        |
| Coniochaeta sp. PML_546          | Ascomycota | Peizomycotina | Sordariomycetes | Diaporthomycetidae | Coniochaetales    | Coniochaetaeae       | PML_546         | Gp0039950 | JGI            | 234867 endophyte (root); saprotroph                      | 33,51   | 102,00 | 68    |      | 37   | 11346 | Illumina HiSeq                  |                        |
| Chrysosporthe austroafricana     | Ascomycota | Peizomycotina | Sordariomycetes | Diaporthales       | Cryphonectriaceae | Cryphonectriaceae    | CMW 2113        | Gp0146002 | JYIP01         | 263707 plant pathogen (eucalyptus, Tibouchina, Syzygium) | 44,66   | 40     | 6415  |      |      |       | 54,3 Illumina MiSeq; IonTorrent |                        |
| Chrysosporthe austroafricana     | Ascomycota | Peizomycotina | Sordariomycetes | Diaporthales       | Cryphonectriaceae | Cryphonectriaceae    | CMW 2113        | Gp0146002 | JYIP01         | 263707 plant pathogen (eucalyptus, Tibouchina, Syzygium) | 44,66   | 40,00  | 6415  |      |      |       | 54,3 Illumina MiSeq; IonTorrent |                        |
| Chrysosporthe cubensis           | Ascomycota | Peizomycotina | Sordariomycetes | Diaporthales       | Cryphonectriaceae | Cryphonectriaceae    | CMW 10028       | Gp0117564 | LJCY01         | 264999 plant pathogen (eucalyptus, Tibouchina, Syzygium) | 42,62   | 40     | 1257  |      | 954  |       | 55,1 Illumina MiSeq             |                        |
| Chrysosporthe cubensis           | Ascomycota | Peizomycotina | Sordariomycetes | Diaporthales       | Cryphonectriaceae | Cryphonectriaceae    | CMW 10028       | Gp0117564 | LJCY01         | 264999 plant pathogen (eucalyptus, Tibouchina, Syzygium) | 42,62   | 40,00  | 1257  |      | 954  |       | 55,1 Illumina MiSeq             |                        |
| Chrysosporthe deuterocubensis    | Ascomycota | Peizomycotina | Sordariomycetes | Diaporthales       | Cryphonectriaceae | Cryphonectriaceae    | CMW 8650        | Gp0117565 | LJDD01         | 265023 plant pathogen (eucalyptus, Tibouchina, Syzygium) | 43,97   | 45     | 3126  |      | 2574 |       | 55,3 Illumina MiSeq             |                        |
| Chrysosporthe deuterocubensis    | Ascomycota | Peizomycotina | Sordariomycetes | Diaporthales       | Cryphonectriaceae | Cryphonectriaceae    | CMW 8650        | Gp0117565 | LJDD01         | 265023 plant pathogen (eucalyptus, Tibouchina, Syzygium) | 43,97   | 45,00  | 3126  |      | 2574 |       | 55,3 Illumina MiSeq             |                        |
| Cryphonectria parasitica         | Ascomycota | Peizomycotina | Sordariomycetes | Diaporthales       | Cryphonectriaceae | Cryphonectriaceae    | EP155           | Gp0002604 | JGI            | 207842 plant pathogen (chestnut blight)                  | 43,9    | 8,54   | 33    |      | 26   | 11184 |                                 |                        |
| Cryphonectria parasitica         | Ascomycota | Peizomycotina | Sordariomycetes | Diaporthales       | Cryphonectriaceae | Cryphonectriaceae    | EP155           | Gp0002604 | JGI            | 207842 plant pathogen (chestnut blight)                  | 43,9    | 8,54   | 33    |      | 26   | 11184 |                                 |                        |
| Diaporthe ampelina               | Ascomycota | Peizomycotina | Sordariomycetes | Diaporthales       | Diaporthaceae     | Diaporthaceae        | UCDDA912        | Gp0117694 | LCUC01         | 261766 endophyte                                         | 47,33   | 50     | 3116  |      | 2383 |       | 59,5 Illumina HiSeq             |                        |
| Diaporthe ampelina               | Ascomycota | Peizomycotina | Sordariomycetes | Diaporthales       | Diaporthaceae     | Diaporthaceae        | UCDDA912        | Gp0117694 | LCUC01         | 261766 endophyte                                         | 47,33   | 50,00  | 3116  |      | 2383 |       | 59,5 Illumina HiSeq             |                        |
| Diaporthe aspalathi              | Ascomycota | Peizomycotina | Sordariomycetes | Diaporthales       | Diaporthaceae     | Diaporthaceae        | DPM001935       | Gp0144055 | LJS01          | 295230 plant pathogen (soybean stem canker)              | 55,03   | 100    | 5371  |      | 1871 |       | 51,6 Illumina HiSeq             |                        |
| Diaporthe aspalathi              | Ascomycota | Peizomycotina | Sordariomycetes | Diaporthales       | Diaporthaceae     | Diaporthaceae        | DPM001935       | Gp0144055 | LJS01          | 295230 plant pathogen (soybean stem canker)              | 55,03   | 100,00 | 5371  |      | 1871 |       | 51,6 Illumina HiSeq             |                        |
| Diaporthe longicolla             | Ascomycota | Peizomycotina | Sordariomycetes | Diaporthales       | Diaporthaceae     | Diaporthaceae        | MS10-6          | Gp0038530 | AYRD01         | 174445 plant pathogen (soybean)                          | 62,26   | 97,00  | 8023  |      | 5943 |       | Illumina HiSeq                  |                        |
| Diaporthe longicolla             | Ascomycota | Peizomycotina | Sordariomycetes | Diaporthales       | Diaporthaceae     | Diaporthaceae        | MS10-6          | Gp0038530 | AYRD01         | 174445 plant pathogen (soybean)                          | 62,26   | 97,00  | 8023  |      | 5943 |       | Illumina HiSeq                  |                        |
| Ophiognomonium clavignenti-jugla | Ascomycota | Peizomycotina | Sordariomycetes | Diaporthales       | Gnomoniaceae      | Gnomoniaceae         | MS10-6          | Gp0008964 | AEGN01         | 52061 plant pathogen (butternut)                         | 15,906  | 2,13   | 28868 |      |      |       | 48,8                            | 454                    |
| Ophiognomonium clavignenti-jugla | Ascomycota | Peizomycotina | Sordariomycetes | Diaporthales       | Gnomoniaceae      | Gnomoniaceae         | MS10-6          | Gp0008964 | AEGN01         | 52061 plant pathogen (butternut)                         | 15,906  | 2,13   | 28868 |      |      |       | 48,8                            | 454                    |
| Lolliopodia minuta               | Ascomycota | Peizomycotina | Sordariomycetes | Diaporthales       | Incertae sedis    | Incertae sedis       | CBS 116597 v1.0 |           |                | 1032359 saprotroph tropical                              | 37,42   | 138    | 427   |      | 380  | 11996 | Illumina                        |                        |
| Lolliopodia minuta               | Ascomycota | Peizomycotina | Sordariomycetes | Diaporthales       | Incertae sedis    | Incertae sedis       | CBS 116597 v1.0 |           |                | 1032359 saprotroph tropical                              | 37,42   | 138,00 | 427   |      | 380  | 11996 | Illumina                        |                        |
| Melanconium sp. 1 NRRL 54901     | Ascomycota | Peizomycotina | Sordariomycetes | Diaporthales       | Melanconidaceae   | Melanconidaceae      | NRRL 54901      | Gp0019267 | JGI            | 207856 plant pathogen (probable maize pathogen)          | 58,52   | 92,80  | 465   |      | 100  | 16656 | Illumina                        |                        |
| Melanconium sp. 1 NRRL 54901     | Ascomycota | Peizomycotina | Sordariomycetes | Diaporthales       | Melanconidaceae   | Melanconidaceae      | NRRL 54901      | Gp0019267 | JGI            | 207856 plant pathogen (probable maize pathogen)          | 58,52   | 92,80  | 465   |      | 100  | 16656 | Illumina                        |                        |
| Valsa mali                       | Ascomycota | Peizomycotina | Sordariomycetes | Diaporthales       | Valsaceae         | Valsaceae            | SXYL134         | Gp0118828 | JUIZ01         | 268128 plant pathogen (apple & pear)                     | 35,73   | 180    | 2917  |      | 475  | 11165 | 49,3 Illumina GAlIx             |                        |
| Valsa mali                       | Ascomycota | Peizomycotina | Sordariomycetes | Diaporthales       | Valsaceae         | Valsaceae            | SXYL134         | Gp0118828 | JUIZ01         | 268128 plant pathogen (apple & pear)                     | 35,73   | 180,00 | 2917  |      | 475  | 11165 | 49,3 Illumina GAlIx             |                        |
| Acremonium chrysogenum           | Ascomycota | Peizomycotina | Sordariomycetes | Hypocreomycetidae  | Glomerellales     | Plectosphaerellaceae | ATCC 11550      | Gp0095146 | JPKY00000000.1 | 248608 industrial importance; pharmaceutical importance  | 28,5    | 137    |       |      | 543  | 8901  | Illumina HiSeq                  |                        |
| Acremonium furcatum              | Ascomycota | Peizomycotina | Sordariomycetes | Hypocreomycetidae  | Glomerellales     | Plectosphaerellaceae | JCM 9210        | Gp0144039 | BCIA01         | 313827 biocontrol (mycoparasite)                         | 40,32   | 281    | 94    |      | 9    |       | 57,7 HiSeq 2500                 |                        |
| Colletotrichum godetiae          | Ascomycota | Peizomycotina | Sordariomycetes | Hypocreomycetidae  | Glomerellales     | Glomerellaceae       | CBS 193.32 v1.0 |           |                | 1060998 insect-associated                                | 51,65   | 235    | 194   |      | 194  | 16071 | PacBio                          |                        |
| Colletotrichum lupini            | Ascomycota | Peizomycotina | Sordariomycetes | Hypocreomycetidae  | Glomerellales     | Glomerellaceae       | CBS 109225 v1.0 |           |                | 1061002 plant pathogen (Lupinus flowering plants)        | 58,76   | 97     | 116   |      | 116  | 15365 | PacBio                          |                        |
| Colletotrichum caudatum          | Ascomycota | Peizomycotina | Sordariomycetes | Hypocreomycetidae  | Glomerellales     | Glomerellaceae       | CBS131602 v1.0  |           |                | 1006149 plant pathogen (warm-season grasses)             | 44,2    | 143    | 1381  |      | 1257 | 15294 | Illumina                        |                        |
| Colletotrichum caudatum          | Ascomycota | Peizomycotina | Sordariomycetes | Hypocreomycetidae  | Glomerellales     | Glomerellaceae       | C               |           |                |                                                          |         |        |       |      |      |       |                                 |                        |



|                                   |            |                 |                 |                   |               |                      |               |                |                        |        |                                                        |        |        |       |       |       |       |                        |
|-----------------------------------|------------|-----------------|-----------------|-------------------|---------------|----------------------|---------------|----------------|------------------------|--------|--------------------------------------------------------|--------|--------|-------|-------|-------|-------|------------------------|
| Verticillium longisporum          | Ascomycota | Peizizomycotina | Sordariomycetes | Hypocreomycetidae | Glomerellales | Plectosphaerellaceae | VL1           | Gp0143280      | CVQH01                 | 285310 | plant pathogen (canola)                                | 99,19  |        | 38029 | 28081 | 20793 | 53,9  |                        |
| Verticillium tricolorum           | Ascomycota | Peizizomycotina | Sordariomycetes | Hypocreomycetidae | Glomerellales | Plectosphaerellaceae | MUCL9297      | Gp0076233      | JPET01                 | 229139 | opportunistic plant pathogen (lettuce); saprotroph     | 36,06  | 65,00  | 251   |       |       | 57,3  | illumina HiSeq; PacBio |
| Verticillium tricolorum           | Ascomycota | Peizizomycotina | Sordariomycetes | Hypocreomycetidae | Glomerellales | Plectosphaerellaceae | MUCL9297      | Gp0076233      | JPET01                 | 229139 | opportunistic plant pathogen (lettuce); saprotroph     | 36,06  | 65,00  | 251   |       |       | 57,3  | illumina HiSeq; PacBio |
| Clonostachys rosea                | Ascomycota | Peizizomycotina | Sordariomycetes | Hypocreomycetidae | Hypocreales   | Bionectriaceae       | CBS 125111    | Gp0072263      | JGI                    | 247918 | endophyte; saprotroph; parasite; biocontrol            | 52,44  | 59     | 774   | 74    | 18639 |       | illumina HiSeq         |
| Clonostachys rosea                | Ascomycota | Peizizomycotina | Sordariomycetes | Hypocreomycetidae | Hypocreales   | Bionectriaceae       | CBS 125111    | Gp0072263      | JGI                    | 247918 | endophyte; saprotroph; parasite; biocontrol            | 52,44  | 59,00  | 774   | 74    | 18639 |       | illumina HiSeq         |
| Gliomastix tumulicola             | Ascomycota | Peizizomycotina | Sordariomycetes | Hypocreomycetidae | Hypocreales   | Bionectriaceae       | JCM 17184     | Gp0144014      | BCHX01                 | 313824 | uncertain                                              | 42,39  | 295    | 194   | 72    |       | 54,8  | HiSeq 2500             |
| Gliomastix tumulicola             | Ascomycota | Peizizomycotina | Sordariomycetes | Hypocreomycetidae | Hypocreales   | Bionectriaceae       | JCM 17184     | Gp0144014      | BCHX01                 | 313824 | uncertain                                              | 42,39  | 295,00 | 194   | 72    |       | 54,8  | HiSeq 2500             |
| Stanjonium grisellum              | Ascomycota | Peizizomycotina | Sordariomycetes | Hypocreomycetidae | Hypocreales   | Bionectriaceae       | CBS 655.79    | Gp0050687      | 1029499                | 239486 | soil-associated                                        | 33     | 103,00 | 831   | 151   | 11832 |       | illumina               |
| Aciculosporium take               | Ascomycota | Peizizomycotina | Sordariomycetes | Hypocreomycetidae | Hypocreales   | Clavicipitaceae      | MAFF-241224   | Gp0038974      | University of Kentucky | 67241  | plant pathogen (bamboo parasite)                       | 58,836 | 18,5   | 3298  |       |       | 40,1  | 454 GS FLX Titanium    |
| Aciculosporium take               | Ascomycota | Peizizomycotina | Sordariomycetes | Hypocreomycetidae | Hypocreales   | Clavicipitaceae      | MAFF-241224   | Gp0038974      | University of Kentucky | 67241  | plant pathogen (bamboo parasite)                       | 58,836 | 18,50  | 3298  |       |       | 40,1  | 454 GS FLX Titanium    |
| Aschersonia alejrodis             | Ascomycota | Peizizomycotina | Sordariomycetes | Hypocreomycetidae | Hypocreales   | Clavicipitaceae      | RCEF 2490     | Gp0039338      | AZGY01                 | 72735  | entomopathogen                                         | 30,87  | 76,00  | 604   | 97    | 8461  | 30,87 | illumina HiSeq         |
| Atkinsonella hypoxylon            | Ascomycota | Peizizomycotina | Sordariomycetes | Hypocreomycetidae | Hypocreales   | Clavicipitaceae      | B4728         | Gp0067879      | JFHB01                 | 221544 | parasite (systemic grass)                              | 35,6   | 31,60  | 688   |       |       |       | 454                    |
| Atkinsonella hypoxylon            | Ascomycota | Peizizomycotina | Sordariomycetes | Hypocreomycetidae | Hypocreales   | Clavicipitaceae      | B4728         | Gp0067879      | JFHB01                 | 221544 | parasite (systemic grass)                              | 35,6   | 31,60  | 688   |       |       |       | 454                    |
| Atkinsonella texensis             | Ascomycota | Peizizomycotina | Sordariomycetes | Hypocreomycetidae | Hypocreales   | Clavicipitaceae      | B6155         | Gp0120993      | LBNC01                 | 274998 | epiphyte                                               | 29,37  | 63,7   | 3966  | 2630  |       | 49,8  | illumina MiSeq         |
| Atkinsonella texensis             | Ascomycota | Peizizomycotina | Sordariomycetes | Hypocreomycetidae | Hypocreales   | Clavicipitaceae      | B6155         | Gp0120993      | LBNC01                 | 274998 | epiphyte                                               | 29,37  | 63,70  | 3966  | 2630  |       | 49,8  | illumina MiSeq         |
| Balansia obtecta                  | Ascomycota | Peizizomycotina | Sordariomycetes | Hypocreomycetidae | Hypocreales   | Clavicipitaceae      | B249          | Gp0047672      | JFZS01                 | 221345 | parasite (systemic grass)                              | 30,1   | 21,60  | 1552  |       |       | 48,5  |                        |
| Balansia obtecta                  | Ascomycota | Peizizomycotina | Sordariomycetes | Hypocreomycetidae | Hypocreales   | Clavicipitaceae      | B249          | Gp0047672      | JFZS01                 | 221345 | parasite (systemic grass)                              | 30,1   | 21,60  | 1552  |       |       | 48,5  |                        |
| Claviceps fusiformis              | Ascomycota | Peizizomycotina | Sordariomycetes | Hypocreomycetidae | Hypocreales   | Clavicipitaceae      | PRL 1980      | Gp0038970      | AFRA01                 | 67243  | plant pathogen (pearl millet)                          | 52,585 | 34,90  | 6930  |       |       | 36,9  | 454                    |
| Claviceps fusiformis              | Ascomycota | Peizizomycotina | Sordariomycetes | Hypocreomycetidae | Hypocreales   | Clavicipitaceae      | PRL 1980      | Gp0038970      | AFRA01                 | 67243  | plant pathogen (pearl millet)                          | 52,585 | 34,90  | 6930  |       |       | 36,9  | 454                    |
| Claviceps paspali                 | Ascomycota | Peizizomycotina | Sordariomycetes | Hypocreomycetidae | Hypocreales   | Clavicipitaceae      | 7990          | Gp0008743      | AFRC01                 | 51623  | medical importance (ergot fungus; mycotoxin-producing) | 28,97  | 54,40  | 2304  |       |       | 47,5  | 454                    |
| Claviceps paspali                 | Ascomycota | Peizizomycotina | Sordariomycetes | Hypocreomycetidae | Hypocreales   | Clavicipitaceae      | 7990          | Gp0008743      | AFRC01                 | 51623  | medical importance (ergot fungus; mycotoxin-producing) | 28,97  | 54,40  | 2304  |       |       | 47,5  | 454                    |
| Claviceps purpurea                | Ascomycota | Peizizomycotina | Sordariomycetes | Hypocreomycetidae | Hypocreales   | Clavicipitaceae      |               | 20,1 Gp0038662 | CAGA01                 | 76493  | plant pathogen (cereals)                               | 32,09  |        | 191   |       | 8979  | 51,6  |                        |
| Claviceps purpurea                | Ascomycota | Peizizomycotina | Sordariomycetes | Hypocreomycetidae | Hypocreales   | Clavicipitaceae      |               | 20,1 Gp0038662 | CAGA01                 | 76493  | plant pathogen (cereals)                               | 32,09  |        | 191   |       | 8979  | 51,6  |                        |
| Epichloe (Neotyphodium) gansuense | Ascomycota | Peizizomycotina | Sordariomycetes | Hypocreomycetidae | Hypocreales   | Clavicipitaceae      | E7080         |                | AFRE01                 | 174039 | endophyte (grass)                                      | 39,62  | 41,50  | 1621  |       |       | 44,4  | 454                    |
| Epichloe amarillans               | Ascomycota | Peizizomycotina | Sordariomycetes | Hypocreomycetidae | Hypocreales   | Clavicipitaceae      | E57           | Gp0038968      | AFRF01                 | 67301  | endophyte; plant pathogen                              | 38,06  | 27,70  | 2180  | 2180  |       | 44,3  | 454                    |
| Epichloe amarillans               | Ascomycota | Peizizomycotina | Sordariomycetes | Hypocreomycetidae | Hypocreales   | Clavicipitaceae      | E57           | Gp0038968      | AFRF01                 | 67301  | endophyte; plant pathogen                              | 38,06  | 27,70  | 2180  | 2180  |       | 44,3  | 454                    |
| Epichloe baconii                  | Ascomycota | Peizizomycotina | Sordariomycetes | Hypocreomycetidae | Hypocreales   | Clavicipitaceae      | ATCC 200745   | Gp0068053      | JFGY01                 | 221976 | endophyte; plant pathogen                              | 38,08  | 18,40  | 3603  |       |       | 41,6  | 454                    |
| Epichloe baconii                  | Ascomycota | Peizizomycotina | Sordariomycetes | Hypocreomycetidae | Hypocreales   | Clavicipitaceae      | ATCC 200745   | Gp0068053      | JFGY01                 | 221976 | endophyte; plant pathogen                              | 38,08  | 18,40  | 3603  |       |       | 41,6  | 454                    |
| Epichloe brachyelytri             | Ascomycota | Peizizomycotina | Sordariomycetes | Hypocreomycetidae | Hypocreales   | Clavicipitaceae      | E4804         | Gp0038969      | AFRB01                 | 67245  | endophyte; plant pathogen                              | 44,23  | 24,60  | 5136  |       |       | 40,2  | 454                    |
| Epichloe brachyelytri             | Ascomycota | Peizizomycotina | Sordariomycetes | Hypocreomycetidae | Hypocreales   | Clavicipitaceae      | E4804         | Gp0038969      | AFRB01                 | 67245  | endophyte; plant pathogen                              | 44,23  | 24,60  | 5136  |       |       | 40,2  | 454                    |
| Epichloe bromicola                | Ascomycota | Peizizomycotina | Sordariomycetes | Hypocreomycetidae | Hypocreales   | Clavicipitaceae      | ATCC 200750   | Gp0047721      | JFHA01                 | 221343 | endophyte; plant pathogen                              | 28,57  | 6,70   | 16548 |       |       | 45,3  | 454                    |
| Epichloe bromicola                | Ascomycota | Peizizomycotina | Sordariomycetes | Hypocreomycetidae | Hypocreales   | Clavicipitaceae      | ATCC 200750   | Gp0047721      | JFHA01                 | 221343 | endophyte; plant pathogen                              | 28,57  | 6,70   | 16548 |       |       | 45,3  | 454                    |
| Epichloe elymi                    | Ascomycota | Peizizomycotina | Sordariomycetes | Hypocreomycetidae | Hypocreales   | Clavicipitaceae      | E56           | Gp0039395      | AMDJ01                 | 173776 | endophyte                                              | 32,335 | 31,80  | 6988  |       |       | 46,6  | 454; Ion Torrent       |
| Epichloe elymi                    | Ascomycota | Peizizomycotina | Sordariomycetes | Hypocreomycetidae | Hypocreales   | Clavicipitaceae      | E56           | Gp0039395      | AMDJ01                 | 173776 | endophyte                                              | 32,335 | 31,80  | 6988  |       |       | 46,6  | 454; Ion Torrent       |
| Epichloe festucae                 | Ascomycota | Peizizomycotina | Sordariomycetes | Hypocreomycetidae | Hypocreales   | Clavicipitaceae      | F11           | Gp0008744      | AFRX01                 | 51625  | endophyte                                              | 35,105 | 27,80  | 1722  | 799   |       | 44,1  | 454; Sanger            |
| Epichloe festucae                 | Ascomycota | Peizizomycotina | Sordariomycetes | Hypocreomycetidae | Hypocreales   | Clavicipitaceae      | F11           | Gp0008744      | AFRX01                 | 51625  | endophyte                                              | 35,105 | 27,80  | 1722  | 799   |       | 44,1  | 454; Sanger            |
| Epichloe glyceriae                | Ascomycota | Peizizomycotina | Sordariomycetes | Hypocreomycetidae | Hypocreales   | Clavicipitaceae      | E277          | Gp0038972      | AFRG01                 | 67247  | endophyte; plant pathogen                              | 46,72  | 27,70  | 3076  |       |       | 45    | 454                    |
| Epichloe glyceriae                | Ascomycota | Peizizomycotina | Sordariomycetes | Hypocreomycetidae | Hypocreales   | Clavicipitaceae      | E277          | Gp0038972      | AFRG01                 | 67247  | endophyte; plant pathogen                              | 46,72  | 27,70  | 3076  |       |       | 45    | 454                    |
| Epichloe mollis                   | Ascomycota | Peizizomycotina | Sordariomycetes | Hypocreomycetidae | Hypocreales   | Clavicipitaceae      | AL9924        | Gp0047723      | JFGW01                 | 215230 | endophyte; plant pathogen                              | 36,169 | 28,00  | 1068  |       |       | 44    | 454                    |
| Epichloe mollis                   | Ascomycota | Peizizomycotina | Sordariomycetes | Hypocreomycetidae | Hypocreales   | Clavicipitaceae      | AL9924        | Gp0047723      | JFGW01                 | 215230 | endophyte; plant pathogen                              | 36,169 | 28,00  | 1068  |       |       | 44    | 454                    |
| Epichloe sylvatica                | Ascomycota | Peizizomycotina | Sordariomycetes | Hypocreomycetidae | Hypocreales   | Clavicipitaceae      | GR10156       | Gp0120997      | LCTT01                 | 275112 | endophyte; plant pathogen (woodland grass sp.)         | 36,1   | 160    | 36463 |       |       | 44,8  | illumina MiSeq         |
| Epichloe sylvatica                | Ascomycota | Peizizomycotina | Sordariomycetes | Hypocreomycetidae | Hypocreales   | Clavicipitaceae      | GR10156       | Gp0120997      | LCTT01                 | 275112 | endophyte; plant pathogen (woodland grass sp.)         | 36,1   | 160,00 | 36463 |       |       | 44,8  | illumina MiSeq         |
| Epichloe typhina                  | Ascomycota | Peizizomycotina | Sordariomycetes | Hypocreomycetidae | Hypocreales   | Clavicipitaceae      | E5819         | Gp0038966      | AFSE01                 | 68441  | plant pathogen (Poaceae)                               | 34,185 | 18,50  | 2556  |       |       | 41,5  | 454                    |
| Epichloe typhina                  | Ascomycota | Peizizomycotina | Sordariomycetes | Hypocreomycetidae | Hypocreales   | Clavicipitaceae      | E5819         | Gp0038966      | AFSE01                 | 68441  | plant pathogen (Poaceae)                               | 34,185 | 18,50  | 2556  |       |       | 41,5  | 454                    |
| Epichloe uncinata                 | Ascomycota | Peizizomycotina | Sordariomycetes | Hypocreomycetidae | Hypocreales   | Clavicipitaceae      | e167          | Gp0120998      | LELE01                 | 275109 | endophyte (grasses)                                    | 53,34  | 131,4  | 23517 | 23102 |       | 49,6  | illumina MiSeq         |
| Epichloe uncinata                 | Ascomycota | Peizizomycotina | Sordariomycetes | Hypocreomycetidae | Hypocreales   | Clavicipitaceae      | e167          | Gp0120998      | LELE01                 | 275109 | endophyte (grasses)                                    | 53,34  | 131,40 | 23517 | 23102 |       | 49,6  | illumina MiSeq         |
| Hypocrella siamensis              | Ascomycota | Peizizomycotina | Sordariomycetes | Hypocreomycetidae | Hypocreales   | Clavicipitaceae      | MTCC 10142    | Gp0091946      | JMQE01                 | 242986 | entomopathogenic                                       | 28,856 | 90,00  | 2034  |       |       | 53,1  | illumina HiSeq         |
| Hypocrella siamensis              | Ascomycota | Peizizomycotina | Sordariomycetes | Hypocreomycetidae | Hypocreales   | Clavicipitaceae      | MTCC 10142    | Gp0091946      | JMQE01                 | 242986 | entomopathogenic                                       | 28,856 | 90,00  | 2034  |       |       | 53,1  | illumina HiSeq         |
| Metacordyceps chlamydosporia      | Ascomycota | Peizizomycotina | Sordariomycetes | Hypocreomycetidae | Hypocreales   | Clavicipitaceae      |               | 123 Gp0038416  | AOSW01                 | 68669  | biocontrol (nematophagous)                             | 42,462 | 136,00 | 8574  | 956   |       | 49,7  | illumina HiSeq         |
| Metacordyceps chlamydosporia      | Ascomycota | Peizizomycotina | Sordariomycetes | Hypocreomycetidae | Hypocreales   | Clavicipitaceae      |               | 123 Gp0038416  | AOSW01                 | 68669  | biocontrol (nematophagous)                             | 42,462 | 136,00 | 8574  | 956   |       | 49,7  | illumina HiSeq         |
| Metarhizium acridum               | Ascomycota | Peizizomycotina | Sordariomycetes | Hypocreomycetidae | Hypocreales   | Clavicipitaceae      | CQMa102       | Gp0006357      | ADNI01                 | 38715  | entomopathogenic; biocontrol                           | 39,422 | 113,00 | 1608  | 241   | 9974  | 49,9  | illumina               |
| Metarhizium acridum               | Ascomycota | Peizizomycotina | Sordariomycetes | Hypocreomycetidae | Hypocreales   | Clavicipitaceae      | CQMa102       | Gp0006357      | ADNI01                 | 38715  | entomopathogenic; biocontrol                           | 39,422 | 113,00 | 1608  | 241   | 9974  | 49,9  | illumina               |
| Metarhizium album                 | Ascomycota | Peizizomycotina | Sordariomycetes | Hypocreomycetidae | Hypocreales   | Clavicipitaceae      | ARSEF 1941    | Gp0039284      | AZHE01                 | 72731  | entomopathogen                                         | 30,45  | 117,07 | 731   | 257   | 8472  | 30,45 | illumina HiSeq         |
| Metarhizium album                 | Ascomycota | Peizizomycotina | Sordariomycetes | Hypocreomycetidae | Hypocreales   | Clavicipitaceae      | ARSEF 1941    | Gp0039284      | AZHE01                 | 72731  | entomopathogen                                         | 30,45  | 117,07 | 731   | 257   | 8472  | 30,45 | illumina HiSeq         |
| Metarhizium anisopliae            | Ascomycota | Peizizomycotina | Sordariomycetes | Hypocreomycetidae | Hypocreales   | Clavicipitaceae      | ARSEF 23      | Gp0006292      | ADNJ01                 | 38717  | entomopathogenic; biocontrol                           | 39,145 | 100,00 | 1265  | 176   | 10726 | 51,5  | illumina               |
| Metarhizium anisopliae            | Ascomycota | Peizizomycotina | Sordariomycetes | Hypocreomycetidae | Hypocreales   | Clavicipitaceae      | ARSEF 23      | Gp0006292      | ADNJ01                 | 38717  | entomopathogenic; biocontrol                           | 39,145 | 100,00 | 1265  | 176   | 10726 | 51,5  | illumina               |
| Metarhizium brunneum              | Ascomycota | Peizizomycotina | Sordariomycetes | Hypocreomycetidae | Hypocreales   | Clavicipitaceae      | ARSEF 3297    | Gp0039279      | AZNG01                 | 184756 | biocontrol (entomopathogen)                            | 37,07  | 80,13  | 180   | 92    | 10689 | 51,5  | illumina HiSeq         |
| Metarhizium guizhouense           | Ascomycota | Peizizomycotina | Sordariomycetes | Hypocreomycetidae | Hypocreales   | Clavicipitaceae      | ARSEF 977     | Gp0039280      | AZNH01                 | 184755 | biocontrol (entomopathogen)                            | 43,47  | 95,42  | 1111  | 563   | 11787 | 49,6  | illumina HiSeq         |
| Metarhizium majus                 | Ascomycota | Peizizomycotina | Sordariomycetes | Hypocreomycetidae | Hypocreales   | Clavicipitaceae      | ARSEF 297     | Gp0039281      | AZNE01                 | 184757 | biocontrol (entomopathogen)                            | 42,02  | 71,17  | 1847  | 1134  | 11535 | 51    | illumina HiSeq         |
| Metarhizium rileyi                | Ascomycota | Peizizomycotina | Sordariomycetes | Hypocreomycetidae | Hypocreales   | Clavicipitaceae      | RCEF 4871     | Gp0039340      | AZHC01                 | 72739  | entomopathogen                                         | 32,01  | 107,34 | 1000  | 389   | 8764  | 49,3  | illumina HiSeq         |
| Metarhizium robertsii             | Ascomycota | Peizizomycotina | Sordariomycetes | Hypocreomycetidae | Hypocreales   | Clavicipitaceae      | ARSEF 2575    | Gp0076192      | ELW01                  | 230500 | parasite (arthropod)                                   | 40,317 | 25,00  | 464   |       |       | 50,8  | 454                    |
| Metarhizium robertsii             | Ascomycota | Peizizomycotina | Sordariomycetes | Hypocreomycetidae | Hypocreales   | Clavicipitaceae      | ARSEF 2575    | Gp0076192      | ELW01                  | 230500 | parasite (arthropod)                                   | 40,317 | 25,00  | 464   |       |       | 50,8  | 454                    |
| Neotyphodium aotearoae            | Ascomycota | Peizizomycotina | Sordariomycetes | Hypocreomycetidae | Hypocreales   | Clavicipitaceae      | ATCC MYA-1229 | Gp0070855      | JFGX01                 | 221524 | endophyte (grass)                                      | 34,423 | 26,30  | 2094  |       |       | 43,6  | 454                    |
| Neotyphodium aotearoae            | Ascomycota | Peizizomycotina | Sordariomycetes | Hypocreomycetidae | Hypocreales   | Clavicipitaceae      | ATCC MYA-1229 | Gp0070855      | JFGX01                 | 221524 | endophyte (grass)                                      | 34,423 | 26,30  | 2094  |       |       | 43,6  | 454                    |
| Neotyphodium gansuense            | Ascomycota | Peizizomycotina | Sordariomycetes | Hypocreomycetidae | Hypocreales   | Clavicipitaceae      | E7080         | Gp0038971      | AFRE01                 | 67299  |                                                        |        |        |       |       |       |       |                        |

|                                    |            |                 |                 |                   |             |                      |              |           |                 |        |                                                                         |         |         |       |       |                                  |
|------------------------------------|------------|-----------------|-----------------|-------------------|-------------|----------------------|--------------|-----------|-----------------|--------|-------------------------------------------------------------------------|---------|---------|-------|-------|----------------------------------|
| Trichoderma pseudokoningii         | Ascomycota | Peizizomycotina | Sordariomycetes | Hypocreomycetidae | Hypocreales | Hypocreaceae         | SMF2         | Gp0039277 | ANBJ01          | 175761 | biocontrol (nematode parasite)                                          | 31,743  | 69,00   | 316   | 194   | 54 454; Illumina HiSeq           |
| Trichoderma pseudokoningii         | Ascomycota | Peizizomycotina | Sordariomycetes | Hypocreomycetidae | Hypocreales | Hypocreaceae         | SMF2         | Gp0039277 | ANBJ01          | 175761 | biocontrol (nematode parasite)                                          | 31,743  | 69,00   | 316   | 194   | 54 454; Illumina HiSeq           |
| Trichoderma reesei                 | Ascomycota | Peizizomycotina | Sordariomycetes | Hypocreomycetidae | Hypocreales | Hypocreaceae         | QM6a         | Gp0017902 | AAILO2          | 15571  | industrial importance (cellulases; hemicellulases)                      | 33,3    | 9,00    | 128   | 77    | 9129 52,8 Sanger                 |
| Trichoderma reesei                 | Ascomycota | Peizizomycotina | Sordariomycetes | Hypocreomycetidae | Hypocreales | Hypocreaceae         | QM6a         | Gp0017902 | AAILO2          | 15571  | industrial importance (cellulases; hemicellulases)                      | 33,3    | 9,00    | 128   | 77    | 9129 52,8 Sanger                 |
| Trichoderma virens                 | Ascomycota | Peizizomycotina | Sordariomycetes | Hypocreomycetidae | Hypocreales | Hypocreaceae         | Gv29-8       | Gp0002706 | ABDF02          | 19983  | biocontrol                                                              | 39      | 8,05    | 93    | 93    | 12427 49,2 Sanger                |
| Trichoderma virens                 | Ascomycota | Peizizomycotina | Sordariomycetes | Hypocreomycetidae | Hypocreales | Hypocreaceae         | Gv29-8       | Gp0002706 | ABDF02          | 19983  | biocontrol                                                              | 39      | 8,05    | 93    | 93    | 12427 49,2 Sanger                |
| Acremonium (Sacrocladium) strictur | Ascomycota | Peizizomycotina | Sordariomycetes | Hypocreomycetidae | Hypocreales | Incertae sedis       | DS1bioAY4a   | Gp0047505 | 1029426         | 239484 | endophyte (grasses); mycoparasite                                       | 35,79   | 120,00  | 81    | 13    | 13158 Illumina                   |
| Sacrocladium oryzae                | Ascomycota | Peizizomycotina | Sordariomycetes | Hypocreomycetidae | Hypocreales | Incertae sedis       | Saro-13      | LOPT01    |                 | 305454 | plant pathogen (rice sheath rot)                                        | 32,78   | 82,00   | 5856  |       | 53,5 Illumina                    |
| Stachybotrys chartarum             | Ascomycota | Peizizomycotina | Sordariomycetes | Hypocreomycetidae | Hypocreales | Incertae sedis       | IBT 40293    | Gp0039336 | ASEQ01          | 185808 | medical importance (stachybotryotoxicosis; mycotoxin-producing-satratox | 36,48   | 192,00  | 4267  | 2342  | 11453 53,3 Illumina HiSeq        |
| Stachybotrys chartarum             | Ascomycota | Peizizomycotina | Sordariomycetes | Hypocreomycetidae | Hypocreales | Incertae sedis       | IBT 40293    | Gp0039336 | ASEQ01          | 185808 | medical importance (stachybotryotoxicosis; mycotoxin-producing-satratox | 36,48   | 192,00  | 4267  | 2342  | 11453 53,3 Illumina HiSeq        |
| Stachybotrys chlorohalonata        | Ascomycota | Peizizomycotina | Sordariomycetes | Hypocreomycetidae | Hypocreales | Incertae sedis       | IBT 40285    | Gp0039361 | APWP01          | 185807 | medical importance (atranone-producing)                                 | 34,39   | 196,00  | 5591  | 2802  | 10706 53,4 Illumina HiSeq        |
| Stachybotrys chlorohalonata        | Ascomycota | Peizizomycotina | Sordariomycetes | Hypocreomycetidae | Hypocreales | Incertae sedis       | IBT 40285    | Gp0039361 | APWP01          | 185807 | medical importance (atranone-producing)                                 | 34,39   | 196,00  | 5591  | 2802  | 10706 53,4 Illumina HiSeq        |
| Ustilagoidea virens                | Ascomycota | Peizizomycotina | Sordariomycetes | Hypocreomycetidae | Hypocreales | Incertae sedis       | IPU010       | Gp0115332 | BBTG02          | 279060 | plant pathogen (rice)                                                   | 33,57   |         | 139   |       | 8426 49,9 Illumina HiSeq; PacBio |
| Ustilagoidea virens                | Ascomycota | Peizizomycotina | Sordariomycetes | Hypocreomycetidae | Hypocreales | Incertae sedis       | IPU010       | Gp0115332 | BBTG02          | 279060 | plant pathogen (rice)                                                   | 33,57   |         | 139   |       | 8426 49,9 Illumina HiSeq; PacBio |
| Dactyloctenidia macrodidyma        | Ascomycota | Peizizomycotina | Sordariomycetes | Hypocreomycetidae | Hypocreales | Nectriaceae          | JAC 15-24    | Gp0117674 | JYGD01          | 274176 | plant pathogen (grapevine, avocado, and olive)                          | 58      | 74      | 1466  | 911   | 50 Illumina HiSeq                |
| Dactyloctenidia macrodidyma        | Ascomycota | Peizizomycotina | Sordariomycetes | Hypocreomycetidae | Hypocreales | Nectriaceae          | JAC 15-24    | Gp0117674 | JYGD01          | 274176 | plant pathogen (grapevine, avocado, and olive)                          | 58      | 74,00   | 1466  | 911   | 50 Illumina HiSeq                |
| Fusarium acuminatum                | Ascomycota | Peizizomycotina | Sordariomycetes | Hypocreomycetidae | Hypocreales | Nectriaceae          | CS5907       | Gp0043378 | CBMG000000000.1 | 206959 | plant pathogen (cereals)                                                | 43,98   |         | 3907  | 758   | Illumina HiSeq                   |
| Fusarium acuminatum                | Ascomycota | Peizizomycotina | Sordariomycetes | Hypocreomycetidae | Hypocreales | Nectriaceae          | CS5907       | Gp0043378 | CBMG000000000.1 | 206959 | plant pathogen (cereals)                                                | 43,98   |         | 3907  | 758   | Illumina HiSeq                   |
| Fusarium avenaceum                 | Ascomycota | Peizizomycotina | Sordariomycetes | Hypocreomycetidae | Hypocreales | Nectriaceae          | FaLH03       | Gp0143156 | JQGD01          | 253730 | plant pathogen (generalist, including grain crops)                      | 43,17   | 459     | 115   | 105   | 48 Illumina HiSeq                |
| Fusarium avenaceum                 | Ascomycota | Peizizomycotina | Sordariomycetes | Hypocreomycetidae | Hypocreales | Nectriaceae          | FaLH03       | Gp0143156 | JQGD01          | 253730 | plant pathogen (generalist, including grain crops)                      | 43,17   | 459,00  | 115   | 105   | 48 Illumina HiSeq                |
| Fusarium circinatum                | Ascomycota | Peizizomycotina | Sordariomycetes | Hypocreomycetidae | Hypocreales | Nectriaceae          | FSP 34       | Gp0005151 | AYJV01          | 41113  | plant pathogen (pitch canker of pines)                                  | 44,138  | 11,00   | 4145  |       | 47,3 454                         |
| Fusarium circinatum                | Ascomycota | Peizizomycotina | Sordariomycetes | Hypocreomycetidae | Hypocreales | Nectriaceae          | FSP 34       | Gp0005151 | AYJV01          | 41113  | plant pathogen (pitch canker of pines)                                  | 44,138  | 11,00   | 4145  |       | 47,3 454                         |
| Fusarium equiseti                  | Ascomycota | Peizizomycotina | Sordariomycetes | Hypocreomycetidae | Hypocreales | Nectriaceae          | CS3069       | Gp0044229 | CBMI000000000.1 | 209001 | plant pathogen (members of the Leguminosae and some cereals)            | 38,06   |         | 5111  |       | Illumina HiSeq                   |
| Fusarium equiseti                  | Ascomycota | Peizizomycotina | Sordariomycetes | Hypocreomycetidae | Hypocreales | Nectriaceae          | CS3069       | Gp0044229 | CBMI000000000.1 | 209001 | plant pathogen (members of the Leguminosae and some cereals)            | 38,06   |         | 5111  |       | Illumina HiSeq                   |
| Fusarium fujikuroi                 | Ascomycota | Peizizomycotina | Sordariomycetes | Hypocreomycetidae | Hypocreales | Nectriaceae          | B14          | Gp0039409 | ANFV01          | 171493 | plant pathogen (rice)                                                   | 43,81   | 75,80   | 455   | 333   | 48,3 Illumina HiSeq              |
| Fusarium fujikuroi                 | Ascomycota | Peizizomycotina | Sordariomycetes | Hypocreomycetidae | Hypocreales | Nectriaceae          | B14          | Gp0039409 | ANFV01          | 171493 | plant pathogen (rice)                                                   | 43,81   | 75,80   | 455   | 333   | 48,3 Illumina HiSeq              |
| Fusarium graminearum               | Ascomycota | Peizizomycotina | Sordariomycetes | Hypocreomycetidae | Hypocreales | Nectriaceae          | CS3005       | Gp0086804 | JATU01          | 235346 | plant pathogen (wheat and barley)                                       | 36,66   | 50,00   | 1205  | 199   | 11578 48,3 Illumina HiSeq        |
| Fusarium graminearum               | Ascomycota | Peizizomycotina | Sordariomycetes | Hypocreomycetidae | Hypocreales | Nectriaceae          | CS3005       | Gp0086804 | JATU01          | 235346 | plant pathogen (wheat and barley)                                       | 36,66   | 50,00   | 1205  | 199   | 11578 48,3 Illumina HiSeq        |
| Fusarium langsethiae               | Ascomycota | Peizizomycotina | Sordariomycetes | Hypocreomycetidae | Hypocreales | Nectriaceae          | F1201059     | Gp0121990 | JXCE01          | 271560 | medical importance (mycotoxin-producing)                                | 37,54   | 500     | 2538  | 1586  | 12232 48,3 Illumina HiSeq; 454   |
| Fusarium langsethiae               | Ascomycota | Peizizomycotina | Sordariomycetes | Hypocreomycetidae | Hypocreales | Nectriaceae          | F1201059     | Gp0121990 | JXCE01          | 271560 | medical importance (mycotoxin-producing)                                | 37,54   | 500,00  | 2538  | 1586  | 12232 48,3 Illumina HiSeq; 454   |
| Fusarium nygamai                   | Ascomycota | Peizizomycotina | Sordariomycetes | Hypocreomycetidae | Hypocreales | Nectriaceae          | MRC8546      | Gp0124341 | LBNR01          | 281294 | plant pathogen (rice)                                                   | 51,62   | 333     | 743   | 409   | 47,5 Illumina HiSeq              |
| Fusarium nygamai                   | Ascomycota | Peizizomycotina | Sordariomycetes | Hypocreomycetidae | Hypocreales | Nectriaceae          | MRC8546      | Gp0124341 | LBNR01          | 281294 | plant pathogen (rice)                                                   | 51,62   | 333,00  | 743   | 409   | 47,5 Illumina HiSeq              |
| Fusarium oxysporum f. sp. congluti | Ascomycota | Peizizomycotina | Sordariomycetes | Hypocreomycetidae | Hypocreales | Nectriaceae          | NRR1 54008   | Gp0037083 | AGNF01          | 73543  | plant pathogen (broad host range)                                       | 53,57   | 124,00  | 3350  | 2552  | 20232 48,4 Illumina              |
| Fusarium oxysporum f. sp. congluti | Ascomycota | Peizizomycotina | Sordariomycetes | Hypocreomycetidae | Hypocreales | Nectriaceae          | NRR1 54008   | Gp0037083 | AGNF01          | 73543  | plant pathogen (broad host range)                                       | 53,57   | 124,00  | 3350  | 2552  | 20232 48,4 Illumina              |
| Fusarium pseudograminearum         | Ascomycota | Peizizomycotina | Sordariomycetes | Hypocreomycetidae | Hypocreales | Nectriaceae          | CS3427       | Gp0043380 | CBMD000000000.1 | 206566 | plant pathogen (wheat)                                                  | 36,93   |         | 685   | 685   | 12447 47,8 Illumina HiSeq        |
| Fusarium pseudograminearum         | Ascomycota | Peizizomycotina | Sordariomycetes | Hypocreomycetidae | Hypocreales | Nectriaceae          | CS3427       | Gp0043380 | CBMD000000000.1 | 206566 | plant pathogen (wheat)                                                  | 36,93   |         | 685   | 685   | 12447 47,8 Illumina HiSeq        |
| Fusarium sambucinum                | Ascomycota | Peizizomycotina | Sordariomycetes | Hypocreomycetidae | Hypocreales | Nectriaceae          | F-4          | Gp0144734 | LSRD01          | 274729 | plant pathogen (potato dry rot); mycotoxin-producing                    | 37,78   | 18      | 961   |       | 47,8 454                         |
| Fusarium sambucinum                | Ascomycota | Peizizomycotina | Sordariomycetes | Hypocreomycetidae | Hypocreales | Nectriaceae          | F-4          | Gp0144734 | LSRD01          | 274729 | plant pathogen (potato dry rot); mycotoxin-producing                    | 37,78   | 18,00   | 961   |       | 47,8 454                         |
| Fusarium sp. JS1030                | Ascomycota | Peizizomycotina | Sordariomycetes | Hypocreomycetidae | Hypocreales | Nectriaceae          | JS1030       | Gp0119197 | JWIV01          | 269535 | uncertain                                                               | 53,75   | 1244    | 310   | 107   | 51,7 Illumina HiSeq; MiSeq       |
| Fusarium sp. JS1030                | Ascomycota | Peizizomycotina | Sordariomycetes | Hypocreomycetidae | Hypocreales | Nectriaceae          | JS1030       | Gp0119197 | JWIV01          | 269535 | uncertain                                                               | 53,75   | 1244,00 | 310   | 107   | 51,7 Illumina HiSeq; MiSeq       |
| Fusarium sp. JS626                 | Ascomycota | Peizizomycotina | Sordariomycetes | Hypocreomycetidae | Hypocreales | Nectriaceae          | JS626        | Gp0119196 | JWIV01          | 269534 | uncertain                                                               | 42,87   | 1966    | 216   | 63    | 48,2 Illumina HiSeq; MiSeq       |
| Fusarium sp. JS626                 | Ascomycota | Peizizomycotina | Sordariomycetes | Hypocreomycetidae | Hypocreales | Nectriaceae          | JS626        | Gp0119196 | JWIV01          | 269534 | uncertain                                                               | 42,87   | 1966,00 | 216   | 63    | 48,2 Illumina HiSeq; MiSeq       |
| Fusarium temperatum                | Ascomycota | Peizizomycotina | Sordariomycetes | Hypocreomycetidae | Hypocreales | Nectriaceae          | CMWF389      | Gp0093049 | LIGR01          | 242703 | plant pathogen (maize); opportunistic human pathogen                    | 45,46   | 414,00  | 244   | 43    | 47 Illumina HiSeq                |
| Fusarium verticillioides           | Ascomycota | Peizizomycotina | Sordariomycetes | Hypocreomycetidae | Hypocreales | Nectriaceae          | FGSC 7600    | Gp0002615 | AAIM02          | 15553  | plant pathogen (maize)                                                  | 41,8851 | 8,00    | 210   | 39    | 15935 48,7 Sanger                |
| Fusarium verticillioides           | Ascomycota | Peizizomycotina | Sordariomycetes | Hypocreomycetidae | Hypocreales | Nectriaceae          | FGSC 7600    | Gp0002615 | AAIM02          | 15553  | plant pathogen (maize)                                                  | 41,8851 | 8,00    | 210   | 39    | 15935 48,7 Sanger                |
| Fusarium virguliforme              | Ascomycota | Peizizomycotina | Sordariomycetes | Hypocreomycetidae | Hypocreales | Nectriaceae          | Mont-1       | Gp0038801 | AEYB01          | 63281  | plant pathogen (soybean)                                                | 50,448  | 20,00   | 3098  | 49,4  | 454                              |
| Fusarium virguliforme              | Ascomycota | Peizizomycotina | Sordariomycetes | Hypocreomycetidae | Hypocreales | Nectriaceae          | Mont-1       | Gp0038801 | AEYB01          | 63281  | plant pathogen (soybean)                                                | 50,448  | 20,00   | 3098  | 49,4  | 454                              |
| Ilyonectria europaea               | Ascomycota | Peizizomycotina | Sordariomycetes | Hypocreomycetidae | Hypocreales | Nectriaceae          | PMI-82       | Gp0019433 | JGI             | 196035 | root-associated                                                         | 63,66   | 153,50  | 950   | 325   | 22250 Illumina HiSeq             |
| Ilyonectria europaea               | Ascomycota | Peizizomycotina | Sordariomycetes | Hypocreomycetidae | Hypocreales | Nectriaceae          | PMI-82       | Gp0019433 | JGI             | 196035 | root-associated                                                         | 63,66   | 153,50  | 950   | 325   | 22250 Illumina HiSeq             |
| Nectria haematococca               | Ascomycota | Peizizomycotina | Sordariomycetes | Hypocreomycetidae | Hypocreales | Nectriaceae          | MPVI 77-13-4 | Gp0017718 | JGI             | 16586  | plant pathogen (broad host range)                                       | 51      |         | 72    | 15707 | 50,8                             |
| Nectria haematococca               | Ascomycota | Peizizomycotina | Sordariomycetes | Hypocreomycetidae | Hypocreales | Nectriaceae          | MPVI 77-13-4 | Gp0017718 | JGI             | 16586  | plant pathogen (broad host range)                                       | 51      |         | 72    | 15707 | 50,8                             |
| Neonectria ditissima               | Ascomycota | Peizizomycotina | Sordariomycetes | Hypocreomycetidae | Hypocreales | Nectriaceae          | RS324p       | Gp0144542 | LDPL01          | 285413 | plant pathogen (apple canker)                                           | 44,95   | 200     | 189   | 172   | 51,8 Illumina HiSeq              |
| Neonectria ditissima               | Ascomycota | Peizizomycotina | Sordariomycetes | Hypocreomycetidae | Hypocreales | Nectriaceae          | RS324p       | Gp0144542 | LDPL01          | 285413 | plant pathogen (apple canker)                                           | 44,95   | 200,00  | 189   | 172   | 51,8 Illumina HiSeq              |
| Niesslia exilis                    | Ascomycota | Peizizomycotina | Sordariomycetes | Hypocreomycetidae | Hypocreales | Niessliaceae         | CBS 358.70   | Gp0036359 | 1019485         | 239481 | saprotroph                                                              | 35,38   | 85,00   | 74    | 34    | 13499 Illumina HiSeq             |
| Niesslia exilis                    | Ascomycota | Peizizomycotina | Sordariomycetes | Hypocreomycetidae | Hypocreales | Niessliaceae         | CBS 358.70   | Gp0036359 | 1019485         | 239481 | saprotroph                                                              | 35,38   | 85,00   | 74    | 34    | 13499 Illumina HiSeq             |
| Valettoniopsis laxa                | Ascomycota | Peizizomycotina | Sordariomycetes | Hypocreomycetidae | Hypocreales | Niessliaceae         | CBS 191.97   | Gp0036333 | 1019489         | 239487 | uncertain; monotypic genus                                              | 22,13   | 95,00   | 213   | 83    | 8026 Illumina HiSeq              |
| Valettoniopsis laxa                | Ascomycota | Peizizomycotina | Sordariomycetes | Hypocreomycetidae | Hypocreales | Niessliaceae         | CBS 191.97   | Gp0036333 | 1019489         | 239487 | uncertain; monotypic genus                                              | 22,13   | 95,00   | 213   | 83    | 8026 Illumina HiSeq              |
| Drechmeria coniospora              | Ascomycota | Peizizomycotina | Sordariomycetes | Hypocreomycetidae | Hypocreales | Ophiocordycipitaceae | ATCC 96282   | Gp0120732 | JYHR01          | 269584 | biocontrol (nematode endoparasite)                                      | 31,89   | 100     | 1012  | 75    | 8216 53,9 Illumina HiSeq; SOLiD  |
| Drechmeria coniospora              | Ascomycota | Peizizomycotina | Sordariomycetes | Hypocreomycetidae | Hypocreales | Ophiocordycipitaceae | ATCC 96282   | Gp0120732 | JYHR01          | 269584 | biocontrol (nematode endoparasite)                                      | 31,89   | 100,00  | 1012  | 75    | 8216 53,9 Illumina HiSeq; SOLiD  |
| Hirsutella minnesotensis           | Ascomycota | Peizizomycotina | Sordariomycetes | Hypocreomycetidae | Hypocreales | Ophiocordycipitaceae | 3608         | Gp0038705 | JPUM01          | 67943  | biocontrol (nematode pathogen)                                          | 51,11   | 128,00  | 2109  | 736   | 12700 52,1 Illumina HiSeq        |
| Hirsutella minnesotensis           | Ascomycota | Peizizomycotina | Sordariomycetes | Hypocreomycetidae | Hypocreales | Ophiocordycipitaceae | 3608         | Gp0038705 | JPUM01          | 67943  | biocontrol (nematode pathogen)                                          | 51,11   | 128,00  | 2109  | 736   | 12700 52,1 Illumina HiSeq        |
| Hirsutella thompsonii              | Ascomycota | Peizizomycotina | Sordariomycetes | Hypocreomycetidae | Hypocreales | Ophiocordycipitaceae | MTC3556      | Gp0038699 | APKB01          | 192877 | arthropod pathogen (acarine )                                           | 34,557  | 180,00  | 621   |       | 52,6 Illumina HiSeq              |
| Hirsutella thompsonii              | Ascomycota | Peizizomycotina | Sordariomycetes | Hypocreomycetidae | Hypocreales | Ophiocordycipitaceae | MTC3556      | Gp0038699 | APKB01          | 192877 | arthropod pathogen (acarine )                                           | 34,557  | 180,00  | 621   |       | 52,6 Illumina HiSeq              |
| Ophiocordyceps polyrhachis-furcat  | Ascomycota | Peizizomycotina | Sordariomycetes | Hypocreomycetidae | Hypocreales | Ophiocordycipitaceae | BCC 54312    | Gp0042014 | LKCN01          | 200756 | uncertain                                                               | 43,16   | 37,00   | 4013  | 418   | 42,8 454; Illumina               |
| Ophiocordyceps polyrhachis-furcat  | Ascomycota | Peizizomycotina | Sordariomycetes | Hypocreomycetidae | Hypocreales | Ophiocordycipitaceae | BCC 54312    | Gp0042014 | LKCN01          | 200756 | uncertain                                                               | 43,16   | 37,00   | 4013  | 418   | 42,8 454; Illumina               |
| Ophiocordyceps sinensis            | Ascomycota | Peizizomycotina | Sordariomycetes | Hypocreomycetidae | Hypocreales | Ophiocordycipitaceae | CO18         | Gp0008980 | ANOV01          | 59569  | traditional use                                                         | 78,515  | 241,00  | 25873 | 10603 | 6972 46,2 454; Illumina HiSeq    |
| Ophiocordyceps sinensis            | Ascomycota | Peizizomycotina | Sordariomycetes | Hypocreomycetidae | Hypocreales | Ophiocordycipitaceae | CO18         | Gp0008980 | ANOV01          | 59569  | traditional use                                                         | 78,515  | 241,00  | 25873 | 10603 | 6972 46,2 454; Illumina HiSeq    |
| Ophiocordyceps unilateralis        |            |                 |                 |                   |             |                      |              |           |                 |        |                                                                         |         |         |       |       |                                  |

|                               |            |                |                 |                    |                 |                    |                 |           |                 |        |                                                                        |        |         |      |          |             |                            |
|-------------------------------|------------|----------------|-----------------|--------------------|-----------------|--------------------|-----------------|-----------|-----------------|--------|------------------------------------------------------------------------|--------|---------|------|----------|-------------|----------------------------|
| Ceratocystis manginecans      | Ascomycota | Pezizomycotina | Sordariomycetes | Hypocreomycetidae  | Microascales    | Ceratocystidaceae  | CMW17570        | Gp0097242 | JJRZ01          | 243355 | plant pathogen (mango)                                                 | 31,7   | 22,00   | 2295 | 7494     | 48          | illumina                   |
| Ceratocystis manginecans      | Ascomycota | Pezizomycotina | Sordariomycetes | Hypocreomycetidae  | Microascales    | Ceratocystidaceae  | CMW17570        | Gp0097242 | JJRZ01          | 243355 | plant pathogen (mango)                                                 | 31,7   | 22,00   | 2295 | 7494     | 48          | illumina                   |
| Ceratocystis platani          | Ascomycota | Pezizomycotina | Sordariomycetes | Hypocreomycetidae  | Microascales    | Ceratocystidaceae  | CFO             | Gp0117548 | LBBL01          | 278456 | plant pathogen (trees)                                                 | 29,18  | 655     | 1213 | 5963     | 48,2        | illumina HiSeq             |
| Ceratocystis platani          | Ascomycota | Pezizomycotina | Sordariomycetes | Hypocreomycetidae  | Microascales    | Ceratocystidaceae  | CFO             | Gp0117548 | LBBL01          | 278456 | plant pathogen (trees)                                                 | 29,18  | 655,00  | 1213 | 5963     | 48,2        | illumina HiSeq             |
| Chalaropsis thielavioides     | Ascomycota | Pezizomycotina | Sordariomycetes | Hypocreomycetidae  | Microascales    | Ceratocystidaceae  | JCM 1933        | Gp0143985 | BCGU01          | 313799 | plant pathogen (Fabaceae sp.)                                          | 29,33  | 387     | 252  | 12       | 52,1        | HiSeq 2500                 |
| Chalaropsis thielavioides     | Ascomycota | Pezizomycotina | Sordariomycetes | Hypocreomycetidae  | Microascales    | Ceratocystidaceae  | JCM 1933        | Gp0143985 | BCGU01          | 313799 | plant pathogen (Fabaceae sp.)                                          | 29,33  | 387,00  | 252  | 12       | 52,1        | HiSeq 2500                 |
| Endoconidiophora laricicola   | Ascomycota | Pezizomycotina | Sordariomycetes | Hypocreomycetidae  | Microascales    | Ceratocystidaceae  | CBS100207       | Gp0149935 | LXGT01          | 319433 | insect-associated                                                      | 32,69  | 93,00   | 898  | 879      | 45,4        | illumina                   |
| Huntliella moniliformis       | Ascomycota | Pezizomycotina | Sordariomycetes | Hypocreomycetidae  | Microascales    | Ceratocystidaceae  | CBS118127       | Gp0094242 | JMSH01          | 246136 | saprotroph                                                             | 25,4   | 38,00   | 600  | 6832     | 47,9        | illumina GALix             |
| Huntliella moniliformis       | Ascomycota | Pezizomycotina | Sordariomycetes | Hypocreomycetidae  | Microascales    | Ceratocystidaceae  | CBS118127       | Gp0094242 | JMSH01          | 246136 | saprotroph                                                             | 25,4   | 38,00   | 600  | 6832     | 47,9        | illumina GALix             |
| Huntliella omanensis          | Ascomycota | Pezizomycotina | Sordariomycetes | Hypocreomycetidae  | Microascales    | Ceratocystidaceae  | CMW 11056       | Gp0121623 | JSUI01          | 263445 | plant pathogen (weak mango pathogen)                                   | 31,13  | 9       | 6763 | 6542     | 47,7        | illumina                   |
| Huntliella omanensis          | Ascomycota | Pezizomycotina | Sordariomycetes | Hypocreomycetidae  | Microascales    | Ceratocystidaceae  | CMW 11056       | Gp0121623 | JSUI01          | 263445 | plant pathogen (weak mango pathogen)                                   | 31,13  | 9,00    | 6763 | 6542     | 47,7        | illumina                   |
| Huntliella savannae           | Ascomycota | Pezizomycotina | Sordariomycetes | Hypocreomycetidae  | Microascales    | Ceratocystidaceae  | CBS 121151      | Gp0143126 | LCZG01          | 283473 | saprotroph                                                             | 28,54  | 22      | 1617 | 361      | 48,3        | illumina HiSeq             |
| Huntliella savannae           | Ascomycota | Pezizomycotina | Sordariomycetes | Hypocreomycetidae  | Microascales    | Ceratocystidaceae  | CBS 121151      | Gp0143126 | LCZG01          | 283473 | saprotroph                                                             | 28,54  | 22,00   | 1617 | 361      | 48,3        | illumina HiSeq             |
| Huntliella savannae           | Ascomycota | Pezizomycotina | Sordariomycetes | Hypocreomycetidae  | Microascales    | Ceratocystidaceae  | CMW1546         | Gp0145653 | LKBB01          | 296851 | post harvest pathogen (banana)                                         | 28,42  | 95      | 1849 | 541      | 49,2        | illumina GALix             |
| Thielaviopsis musarum         | Ascomycota | Pezizomycotina | Sordariomycetes | Hypocreomycetidae  | Microascales    | Ceratocystidaceae  | CMW1546         | Gp0145653 | LKBB01          | 296851 | post harvest pathogen (banana)                                         | 28,42  | 95,00   | 1849 | 541      | 49,2        | illumina GALix             |
| Thielaviopsis musarum         | Ascomycota | Pezizomycotina | Sordariomycetes | Hypocreomycetidae  | Microascales    | Ceratocystidaceae  | CMW1546         | Gp0145653 | LKBB01          | 296851 | post harvest pathogen (banana)                                         | 28,42  | 95,00   | 1849 | 541      | 49,2        | illumina GALix             |
| Thielaviopsis paradoxa        | Ascomycota | Pezizomycotina | Sordariomycetes | Hypocreomycetidae  | Microascales    | Ceratocystidaceae  | JCM 6020        | Gp0144032 | BCHJ01          | 313811 | plant pathogen (palm)                                                  | 29,63  | 345     | 282  | 30       | 49          | HiSeq 2500                 |
| Thielaviopsis paradoxa        | Ascomycota | Pezizomycotina | Sordariomycetes | Hypocreomycetidae  | Microascales    | Ceratocystidaceae  | JCM 6020        | Gp0144032 | BCHJ01          | 313811 | plant pathogen (palm)                                                  | 29,63  | 345,00  | 282  | 30       | 49          | HiSeq 2500                 |
| Thielaviopsis punctulata      | Ascomycota | Pezizomycotina | Sordariomycetes | Hypocreomycetidae  | Microascales    | Ceratocystidaceae  | CR-DP1          | Gp0118396 | LAEV01          | 273322 | plant pathogen (date palm)                                             | 28,12  | 75      | 3751 | 2315     | 5296        | 48,3                       |
| Thielaviopsis punctulata      | Ascomycota | Pezizomycotina | Sordariomycetes | Hypocreomycetidae  | Microascales    | Ceratocystidaceae  | CR-DP1          | Gp0118396 | LAEV01          | 273322 | plant pathogen (date palm)                                             | 28,12  | 75,00   | 3751 | 2315     | 5296        | 48,3                       |
| Knoxdaviesia capensis         | Ascomycota | Pezizomycotina | Sordariomycetes | Hypocreomycetidae  | Microascales    | Gondwanamycetaceae | Gs0110866       | Gp0110866 | LNGK01          | 246171 | saprotroph (plant-associated)                                          | 35,54  | 188,00  | 29   | 7940     | 52,8        | HiSeq 2500                 |
| Knoxdaviesia capensis         | Ascomycota | Pezizomycotina | Sordariomycetes | Hypocreomycetidae  | Microascales    | Gondwanamycetaceae | Gs0110866       | Gp0110866 | LNGK01          | 246171 | saprotroph (plant-associated)                                          | 35,54  | 188,00  | 29   | 7940     | 52,8        | HiSeq 2500                 |
| Knoxdaviesia proteae          | Ascomycota | Pezizomycotina | Sordariomycetes | Hypocreomycetidae  | Microascales    | Gondwanamycetaceae | SB2.3           | Gp0110284 | LNGL01          | 275563 | saprotroph (plant-associated)                                          | 35,489 | 271     | 1379 | 133 8173 | 52,7        | HiSeq 2500                 |
| Knoxdaviesia proteae          | Ascomycota | Pezizomycotina | Sordariomycetes | Hypocreomycetidae  | Microascales    | Gondwanamycetaceae | SB2.3           | Gp0110284 | LNGL01          | 275563 | saprotroph (plant-associated)                                          | 35,489 | 271,00  | 1379 | 133 8173 | 52,7        | HiSeq 2500                 |
| Knoxdaviesia proteae          | Ascomycota | Pezizomycotina | Sordariomycetes | Hypocreomycetidae  | Microascales    | Gondwanamycetaceae | SB2.3           | Gp0110284 | LNGL01          | 275563 | saprotroph (plant-associated)                                          | 35,489 | 271,00  | 1379 | 133 8173 | 52,7        | HiSeq 2500                 |
| Corollospora maritima         | Ascomycota | Pezizomycotina | Sordariomycetes | Hypocreomycetidae  | Microascales    | Halosphaeriaceae   | CBS 119819 v2.0 | Gp0033164 | JGI             | 196081 | human pathogen                                                         | 36,1   | 104     | 143  | 13       | 13087       | illumina                   |
| Corollospora maritima         | Ascomycota | Pezizomycotina | Sordariomycetes | Hypocreomycetidae  | Microascales    | Halosphaeriaceae   | CBS 119819 v2.0 | Gp0033164 | JGI             | 196081 | human pathogen                                                         | 36,1   | 104,00  | 143  | 13       | 13087       | illumina                   |
| Microascus trigonosporus      | Ascomycota | Pezizomycotina | Sordariomycetes | Hypocreomycetidae  | Microascales    | Microascaleae      | CBS 218.31      | Gp0033164 | JGI             | 196081 | human pathogen                                                         | 36,1   | 104,00  | 143  | 13       | 13087       | illumina                   |
| Microascus trigonosporus      | Ascomycota | Pezizomycotina | Sordariomycetes | Hypocreomycetidae  | Microascales    | Microascaleae      | CBS 218.31      | Gp0033164 | JGI             | 196081 | human pathogen                                                         | 36,1   | 104,00  | 143  | 13       | 13087       | illumina                   |
| Microascus trigonosporus      | Ascomycota | Pezizomycotina | Sordariomycetes | Hypocreomycetidae  | Microascales    | Microascaleae      | CBS 218.31      | Gp0033164 | JGI             | 196081 | human pathogen                                                         | 36,1   | 104,00  | 143  | 13       | 13087       | illumina                   |
| Scedosporium apiospermum      | Ascomycota | Pezizomycotina | Sordariomycetes | Hypocreomycetidae  | Microascales    | Microascaleae      | IHEM 14462      | Gp0092899 | JOWA01          | 244532 | human pathogen (infects lungs, especially in cystic fibrosis patients) | 41,437 | 280,00  | 333  | 10919    | 50,4        | illumina HiSeq; PacBio     |
| Scedosporium apiospermum      | Ascomycota | Pezizomycotina | Sordariomycetes | Hypocreomycetidae  | Microascales    | Microascaleae      | IHEM 14462      | Gp0092899 | JOWA01          | 244532 | human pathogen (infects lungs, especially in cystic fibrosis patients) | 41,437 | 280,00  | 333  | 10919    | 50,4        | illumina HiSeq; PacBio     |
| Scedosporium aurantiacum      | Ascomycota | Pezizomycotina | Sordariomycetes | Hypocreomycetidae  | Microascales    | Microascaleae      | WM 09.24        | Gp0118269 | JUDQ01          | 261653 | human pathogen                                                         | 39,89  | 162     | 2285 | 1584     | 49,2        | illumina HiSeq             |
| Scedosporium aurantiacum      | Ascomycota | Pezizomycotina | Sordariomycetes | Hypocreomycetidae  | Microascales    | Microascaleae      | WM 09.24        | Gp0118269 | JUDQ01          | 261653 | human pathogen                                                         | 39,89  | 162,00  | 2285 | 1584     | 49,2        | illumina HiSeq             |
| Scedosporium aurantiacum      | Ascomycota | Pezizomycotina | Sordariomycetes | Hypocreomycetidae  | Microascales    | Microascaleae      | WM 09.24        | Gp0118269 | JUDQ01          | 261653 | human pathogen                                                         | 39,89  | 162,00  | 2285 | 1584     | 49,2        | illumina HiSeq             |
| Graphilbum fragrans           | Ascomycota | Pezizomycotina | Sordariomycetes | Diaporthomycetidae | Ophiostomatales | Ophiostomataceae   | CBS 138720      | Gp0124538 | LLKO01          | 298958 | insect-associated (conifer-infesting beetles)                          | 34,27  | 64      | 393  | 80       | 55,7        | illumina HiSeq             |
| Graphilbum fragrans           | Ascomycota | Pezizomycotina | Sordariomycetes | Diaporthomycetidae | Ophiostomatales | Ophiostomataceae   | CBS 138720      | Gp0124538 | LLKO01          | 298958 | insect-associated (conifer-infesting beetles)                          | 34,27  | 64,00   | 393  | 80       | 55,7        | illumina HiSeq             |
| Grosmannia clavigera          | Ascomycota | Pezizomycotina | Sordariomycetes | Diaporthomycetidae | Ophiostomatales | Ophiostomataceae   | kw1407          | Gp0002583 | ACXQ02          | 39837  | plant pathogen; blue stain                                             | 29,79  | 50,00   | 333  | 289      | 8312        | 51,4 Sanger; 454; illumina |
| Grosmannia clavigera          | Ascomycota | Pezizomycotina | Sordariomycetes | Diaporthomycetidae | Ophiostomatales | Ophiostomataceae   | kw1407          | Gp0002583 | ACXQ02          | 39837  | plant pathogen; blue stain                                             | 29,79  | 50,00   | 333  | 289      | 8312        | 51,4 Sanger; 454; illumina |
| Leptographium lundbergii      | Ascomycota | Pezizomycotina | Sordariomycetes | Diaporthomycetidae | Ophiostomatales | Ophiostomataceae   | CBS 138716      | Gp0145151 | LDEF01          | 284246 | insect-associated (beetles)                                            | 26,54  | 70      | 735  | 411      | 56,9        | illumina HiSeq             |
| Leptographium lundbergii      | Ascomycota | Pezizomycotina | Sordariomycetes | Diaporthomycetidae | Ophiostomatales | Ophiostomataceae   | CBS 138716      | Gp0145151 | LDEF01          | 284246 | insect-associated (beetles)                                            | 26,54  | 70,00   | 735  | 411      | 56,9        | illumina HiSeq             |
| Leptographium procerum        | Ascomycota | Pezizomycotina | Sordariomycetes | Diaporthomycetidae | Ophiostomatales | Ophiostomataceae   | CMW34542        | Gp0107386 | JRUC01          | 262457 | plant pathogen (pine)                                                  | 28,57  | 32      | 2747 | 2687     | 54,8        | illumina MiSeq             |
| Leptographium procerum        | Ascomycota | Pezizomycotina | Sordariomycetes | Diaporthomycetidae | Ophiostomatales | Ophiostomataceae   | CMW34542        | Gp0107386 | JRUC01          | 262457 | plant pathogen (pine)                                                  | 28,57  | 32,00   | 2747 | 2687     | 54,8        | illumina MiSeq             |
| Ophiostoma novo-ulmi          | Ascomycota | Pezizomycotina | Sordariomycetes | Diaporthomycetidae | Ophiostomatales | Ophiostomataceae   | H327            | Gp0038489 | AMZD01          | 173023 | plant pathogen (Dutch Elm Disease)                                     | 31,855 | 61,00   | 161  | 10       | 50,1        | 454                        |
| Ophiostoma novo-ulmi          | Ascomycota | Pezizomycotina | Sordariomycetes | Diaporthomycetidae | Ophiostomatales | Ophiostomataceae   | H327            | Gp0038489 | AMZD01          | 173023 | plant pathogen (Dutch Elm Disease)                                     | 31,855 | 61,00   | 161  | 10       | 50,1        | 454                        |
| Ophiostoma piceae             | Ascomycota | Pezizomycotina | Sordariomycetes | Diaporthomycetidae | Ophiostomatales | Ophiostomataceae   | UAMH 11346      | Gp0048401 | AQHS01          | 182071 | saprotroph; wood-staining                                              | 32,84  | 735     | 343  | 45       | 8884        | 53,4 454; illumina HiSeq   |
| Ophiostoma piceae             | Ascomycota | Pezizomycotina | Sordariomycetes | Diaporthomycetidae | Ophiostomatales | Ophiostomataceae   | UAMH 11346      | Gp0048401 | AQHS01          | 182071 | saprotroph; wood-staining                                              | 32,84  | 735,00  | 343  | 45       | 8884        | 53,4 454; illumina HiSeq   |
| Sporothrix brasiliensis       | Ascomycota | Pezizomycotina | Sordariomycetes | Diaporthomycetidae | Ophiostomatales | Ophiostomataceae   | 5110            | Gp0047830 | AWTV01          | 218075 | human and animal pathogen (sporotrichosis)                             | 33,21  | 20,00   | 13   | 9231     | 54,3        | illumina                   |
| Sporothrix brasiliensis       | Ascomycota | Pezizomycotina | Sordariomycetes | Diaporthomycetidae | Ophiostomatales | Ophiostomataceae   | 5110            | Gp0047830 | AWTV01          | 218075 | human and animal pathogen (sporotrichosis)                             | 33,21  | 20,00   | 13   | 9231     | 54,3        | illumina                   |
| Sporothrix globosa            | Ascomycota | Pezizomycotina | Sordariomycetes | Diaporthomycetidae | Ophiostomatales | Ophiostomataceae   | CBS 120340      | Gp0149694 | LVYW01          | 315855 | human and animal pathogen (sporotrichosis)                             | 33,47  | 146,00  | 222  | 24       | 54,3        | illumina                   |
| Sporothrix insectorum         | Ascomycota | Pezizomycotina | Sordariomycetes | Diaporthomycetidae | Ophiostomatales | Ophiostomataceae   | RCEF 264        | Gp0039314 | AZH001          | 72727  | entomopathogen                                                         | 34,72  | 7037,00 | 819  | 78       | 9496        | illumina HiSeq             |
| Sporothrix pallida            | Ascomycota | Pezizomycotina | Sordariomycetes | Diaporthomycetidae | Ophiostomatales | Ophiostomataceae   | SPA8            | Gp0095173 | JNEX01          | 248334 | saprotroph (environmental)                                             | 39,881 | 20,00   | 3392 | 53       | Ion Torrent |                            |
| Sporothrix pallida            | Ascomycota | Pezizomycotina | Sordariomycetes | Diaporthomycetidae | Ophiostomatales | Ophiostomataceae   | SPA8            | Gp0095173 | JNEX01          | 248334 | saprotroph (environmental)                                             | 39,881 | 20,00   | 3392 | 53       | Ion Torrent |                            |
| Sporothrix schenckii          | Ascomycota | Pezizomycotina | Sordariomycetes | Diaporthomycetidae | Ophiostomatales | Ophiostomataceae   | ATCC 58251      | Gp0034023 | AWEQ01          | 217088 | human and animal pathogen (sporotrichosis)                             | 32,228 | 56,00   | 125  | 29       | 8805        | 55,1 illumina              |
| Sporothrix schenckii          | Ascomycota | Pezizomycotina | Sordariomycetes | Diaporthomycetidae | Ophiostomatales | Ophiostomataceae   | ATCC 58251      | Gp0034023 | AWEQ01          | 217088 | human and animal pathogen (sporotrichosis)                             | 32,228 | 56,00   | 125  | 29       | 8805        | 55,1 illumina              |
| Sporothrix schenckii          | Ascomycota | Pezizomycotina | Sordariomycetes | Diaporthomycetidae | Ophiostomatales | Ophiostomataceae   | ATCC 58251      | Gp0034023 | AWEQ01          | 217088 | human and animal pathogen (sporotrichosis)                             | 32,228 | 56,00   | 125  | 29       | 8805        | 55,1 illumina              |
| Chaetomium globosum           | Ascomycota | Pezizomycotina | Sordariomycetes | Sordariomycetidae  | Sordariales     | Chaetomiaceae      | CBS 148.51      | Gp0002586 | AAFU01          | 12795  | human pathogen and allergen (mycosis; mycotoxin-producing)             | 34,88  | 7,00    | 1245 | 37       | 11232       | 55,6 Sanger                |
| Chaetomium globosum           | Ascomycota | Pezizomycotina | Sordariomycetes | Sordariomycetidae  | Sordariales     | Chaetomiaceae      | CBS 148.51      | Gp0002586 | AAFU01          | 12795  | human pathogen and allergen (mycosis; mycotoxin-producing)             | 34,88  | 7,00    | 1245 | 37       | 11232       | 55,6 Sanger                |
| Chaetomium globosum           | Ascomycota | Pezizomycotina | Sordariomycetes | Sordariomycetidae  | Sordariales     | Chaetomiaceae      | CBS 148.51      | Gp0002586 | AAFU01          | 12795  | human pathogen and allergen (mycosis; mycotoxin-producing)             | 34,88  | 7,00    | 1245 | 37       | 11232       | 55,6 Sanger                |
| Chaetomium thermophilum       | Ascomycota | Pezizomycotina | Sordariomycetes | Sordariomycetidae  | Sordariales     | Chaetomiaceae      | DSM 1495        | Gp0007119 | ADUW01          | 47065  | thermophile                                                            | 28,32  | 24,00   | 112  | 21       | 7475        | 52,6 454                   |
| Chaetomium thermophilum       | Ascomycota | Pezizomycotina | Sordariomycetes | Sordariomycetidae  | Sordariales     | Chaetomiaceae      | DSM 1495        | Gp0007119 | ADUW01          | 47065  | thermophile                                                            | 28,32  | 24,00   | 112  | 21       | 7475        | 52,6 454                   |
| Chaetomium thermophilum       | Ascomycota | Pezizomycotina | Sordariomycetes | Sordariomycetidae  | Sordariales     | Chaetomiaceae      | DSM 1495        | Gp0007119 | ADUW01          | 47065  | thermophile                                                            | 28,32  | 24,00   | 112  | 21       | 7475        | 52,6 454                   |
| Myceliophthora heterothallica | Ascomycota | Pezizomycotina | Sordariomycetes | Sordariomycetidae  | Sordariales     | Chaetomiaceae      | CBS 203.75 v1.0 | Gp0017713 | 1006350         | 219689 | thermophile                                                            | 35,36  | 132,8   | 547  | 37       | 10061       | illumina HiSeq             |
| Myceliophthora heterothallica | Ascomycota | Pezizomycotina | Sordariomycetes | Sordariomycetidae  | Sordariales     | Chaetomiaceae      | CBS 203.75 v1.0 | Gp0017713 | 1006350         | 219689 | thermophile                                                            | 35,36  | 132,80  | 547  | 37       | 10061       | illumina HiSeq             |
| Myceliophthora thermophila    | Ascomycota | Pezizomycotina | Sordariomycetes | Sordariomycetidae  | Sordariales     | Chaetomiaceae      | ATCC 42464      | Gp0004720 | GCA_000226095.1 | 32775  | thermophile                                                            | 38,74  | 7       | 7    | 7        | 9110        | 51                         |
| Myceliophthora thermophila    | Ascomycota | Pezizomycotina | Sordariomycetes | S                  |                 |                    |                 |           |                 |        |                                                                        |        |         |      |          |             |                            |

|                                    |            |                  |                 |                   |                   |                    |              |           |                 |                                                                                  |        |        |      |       |                |                            |
|------------------------------------|------------|------------------|-----------------|-------------------|-------------------|--------------------|--------------|-----------|-----------------|----------------------------------------------------------------------------------|--------|--------|------|-------|----------------|----------------------------|
| Millerozyma farinosa               | Ascomycota | Saccharomycotina | Saccharomycetes | Saccharomycetidae | Saccharomycetales | Debaryomycetaceae  | CBS 7064     | Gp0038456 | GCA_000315895.1 | 73835 halotolerant; osmotolerant                                                 | 21,459 | 9,80   | 17   | 11662 | 41,33          | Sanger                     |
| Piceomyces haplophilus             | Ascomycota | Saccharomycotina | Saccharomycetes | Saccharomycetidae | Saccharomycetales | Debaryomycetaceae  | JCM 1635     | Gp0144012 | BCIF01          | 313831 insect-associated (bark beetles)                                          | 10,52  | 273,00 | 29   | 9     | 41             | HiSeq 2500                 |
| Scheffersomyces lignosus           | Ascomycota | Saccharomycotina | Saccharomycetes | Saccharomycetidae | Saccharomycetales | Debaryomycetaceae  | JCM 9837     | Gp0144050 | BCGS01          | 313797 fermentation (xylose)                                                     | 16,59  | 171,00 | 73   | 19    | 41,2           | HiSeq 2500                 |
| Scheffersomyces stipitidis         | Ascomycota | Saccharomycotina | Saccharomycetes | Saccharomycetidae | Saccharomycetales | Debaryomycetaceae  | CBS 6054     | Gp0017786 | AAVQ01          | 16843 fermentation                                                               | 15,4   |        |      | 9     | 5841           | 41                         |
| Spathaspora arborariae             | Ascomycota | Saccharomycotina | Saccharomycetes | Saccharomycetidae | Saccharomycetales | Debaryomycetaceae  | UFMG-19.1A   | Gp0043415 | AYLH01          | 207280 industrial importance                                                     | 12,87  | 23,00  | 381  | 41    | 31,9           | 454                        |
| Spathaspora passalidarum           | Ascomycota | Saccharomycotina | Saccharomycetes | Saccharomycetidae | Saccharomycetales | Debaryomycetaceae  | NRRL Y-27907 | Gp0017849 | AEIK01          | 53891 industrial importance (biofuel production-xylose fermentation)             | 13,2   |        | 26   | 8     | 5983           | 42 454; Sanger             |
| Wickerhamia fluorescens            | Ascomycota | Saccharomycotina | Saccharomycetes | Saccharomycetidae | Saccharomycetales | Debaryomycetaceae  | JCM 1821     | Gp0144017 | BCEG01          | 313784 saprotroph                                                                | 13,18  | 239,00 | 109  | 20    | 37,3           | HiSeq 2500                 |
| Geotrichum candidum                | Ascomycota | Saccharomycotina | Saccharomycetes | Saccharomycetidae | Saccharomycetales | Dipodascaceae      | 3C           | Gp0106203 | JMRO01          | 243259 plant pathogen (citrus)                                                   | 41,38  | 31,25  | 560  |       | 41,38          | 454                        |
| Saprochaete clavata                | Ascomycota | Saccharomycotina | Saccharomycetes | Saccharomycetidae | Saccharomycetales | Dipodascaceae      | CNRM 12.647  | Gp0145559 | CBXB01          | 221847 human pathogen                                                            | 17,72  |        | 3170 | 339   | 33,8           |                            |
| Sporopachydermia quercuum          | Ascomycota | Saccharomycotina | Saccharomycetes | Saccharomycetidae | Saccharomycetales | Dipodascaceae      | JCM 9486     | Gp0144045 | BCGN01          | 313792 endophyte                                                                 | 16,41  | 182,00 | 37   | 15    | 36,2           | illumina HiSeq             |
| Yarrowia deformans                 | Ascomycota | Saccharomycotina | Saccharomycetes | Saccharomycetidae | Saccharomycetales | Dipodascaceae      | JCM 1694     | Gp0144013 | BCIW01          | 313845 industrial importance (Alkane-using)                                      | 20,88  | 131,00 | 174  | 44    | 50             | HiSeq 2500                 |
| Yarrowia keelungensis              | Ascomycota | Saccharomycotina | Saccharomycetes | Saccharomycetidae | Saccharomycetales | Dipodascaceae      | JCM 14894    | Gp0144005 | BCJD01          | 313892 Industrial importance; oil-degrading                                      | 21,82  | 203,00 | 180  | 41    | 48             | HiSeq 2500                 |
| Yarrowia lipolytica                | Ascomycota | Saccharomycotina | Saccharomycetes | Saccharomycetidae | Saccharomycetales | Dipodascaceae      | CLIB122      | Gp0000567 | GCA_000002525.1 | 13837 industrial importance (Alkane-using)                                       | 20,5   | 10,00  | 6    | 6     | 6447           | 49 Sanger                  |
| Yarrowia sp. JCM 30694             | Ascomycota | Saccharomycotina | Saccharomycetes | Saccharomycetidae | Saccharomycetales | Dipodascaceae      | JCM 30694    | Gp0143753 | BCKF01          | 313895 uncertain                                                                 | 21,76  | 217,00 | 244  | 19    | 46             | HiSeq 2500                 |
| Yarrowia sp. JCM 30695             | Ascomycota | Saccharomycotina | Saccharomycetes | Saccharomycetidae | Saccharomycetales | Dipodascaceae      | JCM 30695    | Gp0150865 | BCLX01          | 313897 uncertain                                                                 | 21,9   | 251,00 | 189  | 41    | 47,8           | illumina                   |
| Yarrowia sp. JCM 30696             | Ascomycota | Saccharomycotina | Saccharomycetes | Saccharomycetidae | Saccharomycetales | Dipodascaceae      | JCM 30696    | Gp0143755 | BCKG01          | 313896 uncertain                                                                 | 21,75  | 230,00 | 206  | 39    | 47,9           | HiSeq 2500                 |
| Ashbya aceri                       | Ascomycota | Saccharomycotina | Saccharomycetes | Saccharomycetidae | Saccharomycetales | Dipodascaceae      | JCM 30696    | Gp0143755 | BCKG01          | 313896 uncertain                                                                 | 21,75  | 230,00 | 206  | 39    | 47,9           | HiSeq 2500                 |
| Eremothecium (Ashbya) gossypii     | Ascomycota | Saccharomycotina | Saccharomycetes | Saccharomycetidae | Saccharomycetales | Eremotheciaceae    | FD-2008      | Gp0006845 | GCA_000412225.2 | 8951 insect-associated                                                           | 9,9    |        | 7    | 7     | 3887           | 51 Sanger                  |
| Eremothecium coryli                | Ascomycota | Saccharomycotina | Saccharomycetes | Saccharomycetidae | Saccharomycetales | Eremotheciaceae    | ATCC 10895   | Gp0000589 | GCA_000091025.4 | 13834 plant pathogen (insect-associated; cotton)                                 | 9,1    | 4,20   | 7    | 7     | 4768           | 19 Sanger                  |
| Eremothecium cymbalariae           | Ascomycota | Saccharomycotina | Saccharomycetes | Saccharomycetidae | Saccharomycetales | Eremotheciaceae    | CBS 5749     | Gp0097267 | AZAH01          | 229863 plant pathogen (soybean)                                                  | 9,09   | 18,00  | 63   | 19    | 41,6           | illumina HiSeq             |
| Ambrosiozyma kashinagacola         | Ascomycota | Saccharomycotina | Saccharomycetes | Saccharomycetidae | Saccharomycetales | Eremotheciaceae    | DBVPG#7215   | Gp0008918 | GCA_000235365.1 | 60715 plant pathogen (stigmatomycosis; fruit rot; crops)                         | 9,66   | 40,00  | 9    | 8     | 4853           | 40,3                       |
| Ambrosiozyma monospora             | Ascomycota | Saccharomycotina | Saccharomycetes | Saccharomycetidae | Saccharomycetales | Uncertae sedis     | JCM 15019    | Gp0144006 | BCEA01          | 313780 insect-associated                                                         | 12,32  | 227,00 | 59   | 23    | 36,1           | HiSeq 2500                 |
| Candida albicans                   | Ascomycota | Saccharomycotina | Saccharomycetes | Saccharomycetidae | Saccharomycetales | Uncertae sedis     | JCM 7599     | Gp0144035 | BCIP01          | 313840 industrial importance; ethanol production                                 | 24,98  | 116,00 | 304  | 118   | 37,2           | HiSeq 2500                 |
| Candida apicola                    | Ascomycota | Saccharomycotina | Saccharomycetes | Saccharomycetidae | Saccharomycetales | Uncertae sedis     | SCS314       | Gp0000024 | AACQ01          | 10701 opportunistic human pathogen                                               | 27,56  |        | 413  |       | 14217          | 33,4                       |
| Candida arabinofementans           | Ascomycota | Saccharomycotina | Saccharomycetes | Saccharomycetidae | Saccharomycetales | Uncertae sedis     | NRRL Y-50540 | Gp0120946 | LBNK01          | 278776 industrial importance (sophorolipid producing)                            | 9,77   | 211,00 | 135  | 40    | 45,2           | illumina GALix             |
| Candida auris                      | Ascomycota | Saccharomycotina | Saccharomycetes | Saccharomycetidae | Saccharomycetales | Uncertae sedis     | NRRL YB-2248 | Gp0009551 | JGI             | 207879 industrial importance                                                     | 13,23  | 74,00  | 244  | 62    | 5861           | 454; illumina              |
| Candida boidinii                   | Ascomycota | Saccharomycotina | Saccharomycetes | Saccharomycetidae | Saccharomycetales | Uncertae sedis     | 6684         | Gp0144502 | LGST01          | 267757 human pathogen (multidrug healthcare infections)                          | 12,5   | 179,00 | 759  | 99    | 8301           | 45,1 illumina HiSeq; MiSeq |
| Candida bracedensis                | Ascomycota | Saccharomycotina | Saccharomycetes | Saccharomycetidae | Saccharomycetales | Uncertae sedis     | GF002        | Gp0143128 | LMZ001          | 299882 industrial importance (methylotrophic)                                    | 19,11  | 144,00 | 43   | 428   | 30,4           | illumina HiSeq             |
| Candida carpophila                 | Ascomycota | Saccharomycotina | Saccharomycetes | Saccharomycetidae | Saccharomycetales | Uncertae sedis     | CBS 10154    | Gp0041972 | CAPU000000000.1 | 202296 opportunistic human pathogen                                              | 12,2   |        | 51   |       |                |                            |
| Candida caseinolytica              | Ascomycota | Saccharomycotina | Saccharomycetes | Saccharomycetidae | Saccharomycetales | Uncertae sedis     | JCM 9396     | Gp0144041 | BCKG01          | 313789 probable human pathogen                                                   | 10,24  | 273,00 | 26   | 10    | 47,4           | HiSeq 2500                 |
| Candida castellii                  | Ascomycota | Saccharomycotina | Saccharomycetes | Saccharomycetidae | Saccharomycetales | Uncertae sedis     | NRRL Y-17796 | Gp0005936 | JGI             | 76687 plant pathogen (possible; associated with rot in cacti)                    | 9,18   | 47,89  | 49   | 6     | 4657           | 454; illumina              |
| Candida dubliniensis               | Ascomycota | Saccharomycotina | Saccharomycetes | Saccharomycetidae | Saccharomycetales | Uncertae sedis     | CBS 4332     | Gp0041973 | CAPW000000000.1 | 202297 uncertain                                                                 | 10,2   |        | 101  |       |                |                            |
| Candida ethanolica                 | Ascomycota | Saccharomycotina | Saccharomycetes | Saccharomycetidae | Saccharomycetales | Uncertae sedis     | CD36         | Gp0002579 | ASM2694v1       | 34697 opportunistic human pathogen                                               | 14,62  | 11,00  |      | 8     | 6095           | 33 Sanger                  |
| Candida glabrata                   | Ascomycota | Saccharomycotina | Saccharomycetes | Saccharomycetidae | Saccharomycetales | Uncertae sedis     | M2           | Gp0039259 | ANNA01          | 171020 industrial importance                                                     | 23,58  | 85,00  | 2647 |       | 26,4           | illumina HiSeq             |
| Candida homilientoma               | Ascomycota | Saccharomycotina | Saccharomycetes | Saccharomycetidae | Saccharomycetales | Uncertae sedis     | CBS 138      | Gp0000563 | ASM254v2        | 13831 human pathogen                                                             | 12,3   | 8,00   |      | 13    | 5462           | 39 Sanger                  |
| Candida intermedia                 | Ascomycota | Saccharomycotina | Saccharomycetes | Saccharomycetidae | Saccharomycetales | Uncertae sedis     | JCM 1507     | Gp0144054 | BCGB01          | 313781 insect-associated (Bostrychid beetles)                                    | 12,18  | 223,00 | 32   | 8     | 49,4           | HiSeq 2500                 |
| Candida maltosa                    | Ascomycota | Saccharomycotina | Saccharomycetes | Saccharomycetidae | Saccharomycetales | Uncertae sedis     | JCM 1607     | Gp0144011 | BCGD01          | 313783 opportunistic human pathogen (candidiasis)                                | 13,03  | 218,00 | 54   | 12    | 43,2           | HiSeq 2500                 |
| Candida nivariensis                | Ascomycota | Saccharomycotina | Saccharomycetes | Saccharomycetidae | Saccharomycetales | Uncertae sedis     | Xu316        | Gp0039144 | AOGT01          | 184737 industrial importance                                                     | 12,8   | 130,00 | 2947 |       | 5986           | 34,2 illumina HiSeq        |
| Candida orthopsilosis              | Ascomycota | Saccharomycotina | Saccharomycetes | Saccharomycetidae | Saccharomycetales | Uncertae sedis     | CBS 9983     | Gp0041974 | CAPV000000000.1 | 202298 human pathogen; drug-resistant                                            | 11,56  |        | 123  |       |                |                            |
| Candida parapsilosis               | Ascomycota | Saccharomycotina | Saccharomycetes | Saccharomycetidae | Saccharomycetales | Uncertae sedis     | AY2          | Gp0039261 | AMDC01          | 171019 human pathogen                                                            | 12,65  | 67,00  | 4152 | 8     | 3296           | 37,6 illumina GALix        |
| Candida sorboxylosa                | Ascomycota | Saccharomycotina | Saccharomycetes | Saccharomycetidae | Saccharomycetales | Uncertae sedis     | CD317        | Gp0002580 | CABE01          | 32889 human pathogen (sepsis)                                                    | 13,08  | 9,20   | 24   |       | 38,7           | Sanger                     |
| Candida succiphila                 | Ascomycota | Saccharomycotina | Saccharomycetes | Saccharomycetidae | Saccharomycetales | Uncertae sedis     | JCM 1536     | Gp0144008 | BCCG01          | 313782 industrial importance (fermentative yeast)                                | 10,71  | 247,00 | 277  | 37    | 38,2           | HiSeq 2500                 |
| Candida tanzawaensis               | Ascomycota | Saccharomycotina | Saccharomycetes | Saccharomycetidae | Saccharomycetales | Uncertae sedis     | JCM 9445     | Gp0144043 | BCGL01          | 313790 industrial importance (methanol-assimilating)                             | 12,15  | 234,00 | 64   | 22    | 40,9           | HiSeq 2500                 |
| Candida tenuis                     | Ascomycota | Saccharomycotina | Saccharomycetes | Saccharomycetidae | Saccharomycetales | Uncertae sedis     | NRRL Y-17324 | Gp0009552 | JGI             | 207878 insect-associated                                                         | 13,14  | 74,00  | 52   | 16    | 5895           | 454; illumina              |
| Candida tropicalis                 | Ascomycota | Saccharomycotina | Saccharomycetes | Saccharomycetidae | Saccharomycetales | Uncertae sedis     | ATCC 10573   | Gp0016931 | JGI             | 33673 industrial importance                                                      | 10,7   | 26,90  | 668  | 25    | 5533           | 42 454; Sanger             |
| Candida versatilis                 | Ascomycota | Saccharomycotina | Saccharomycetes | Saccharomycetidae | Saccharomycetales | Uncertae sedis     | MYA-3404     | Gp0006759 | AAFN01          | 13675 human pathogen (candidiasis); industrial importance (biodiesel production) | 14,6   | 10,00  | 128  | 24    | 6441           | 33 Sanger                  |
| Lodderomyces elongisporus          | Ascomycota | Saccharomycotina | Saccharomycetes | Saccharomycetidae | Saccharomycetales | Uncertae sedis     | JCM 5958     | Gp0144031 | BCIV01          | 313866 industrial importance (salt-tolerant)                                     | 9,31   | 441,00 | 52   | 19    | 44,9           | HiSeq 2500                 |
| Nadsonia fulvescens                | Ascomycota | Saccharomycotina | Saccharomycetes | Saccharomycetidae | Saccharomycetales | Uncertae sedis     | NRRL YB-4239 | Gp0002646 | AAPO01          | 12899 possible human pathogen                                                    | 15,547 | 8,70   | 145  | 28    | 5908           | 37                         |
| Pachysolen tannophilus             | Ascomycota | Saccharomycotina | Saccharomycetes | Saccharomycetidae | Saccharomycetales | Uncertae sedis     | DSM 6958     | Gp0009966 | JGI             | 207853 uncertain; yeast (bipolar budding)                                        | 13,75  | 72,50  | 64   | 20    | 5657           | 39 454; illumina           |
| Starmerella bombicola              | Ascomycota | Saccharomycotina | Saccharomycetes | Saccharomycetidae | Saccharomycetales | Uncertae sedis     | NRRL Y-2460  | Gp0038525 | CAHV01          | 85615 Fermentation; osmotolerant                                                 | 12,6   | 90,65  | 583  | 198   | 5675           | 29,8 454; illumina; Sanger |
| Zygoascus hellenicus               | Ascomycota | Saccharomycotina | Saccharomycetes | Saccharomycetidae | Saccharomycetales | Uncertae sedis     | JCM 9596     | Gp0144046 | BGG001          | 313793 industrial importance (Sphorolipids, Glycolipid Biosurfactant production) | 9,56   | 299,00 | 63   | 16    | 47,6           | HiSeq 2500                 |
| Lipomyces starkeyi                 | Ascomycota | Saccharomycotina | Saccharomycetes | Saccharomycetidae | Saccharomycetales | Uncertae sedis     | Y-7136 v1.0  | Gp0009552 | JGI             | human pathogen (fungemia)                                                        | 12,17  | 98,40  | 48   | 11    | 5430           | illumina                   |
| Clavispora lusitanae               | Ascomycota | Saccharomycotina | Saccharomycetes | Saccharomycetidae | Saccharomycetales | Lipomycetaceae     | NRRL Y11557  | Gp0000708 | JGI             | 71653 metabolically interesting                                                  | 21,27  | 47,87  | 439  | 117   | 8192           | 54 454; illumina; Sanger   |
| Metschnikowia bicuspidata          | Ascomycota | Saccharomycotina | Saccharomycetes | Saccharomycetidae | Saccharomycetales | Metschnikowiaceae  | ATCC 42720   | Gp0002581 | AAFT01          | 12753 human pathogen                                                             | 12,1   | 9,00   | 88   | 9     | 6153           | 44,5 Sanger                |
| Metschnikowia fructicola           | Ascomycota | Saccharomycotina | Saccharomycetes | Saccharomycetidae | Saccharomycetales | Metschnikowiaceae  | Baker2002    | Gp0072273 | JGI             | 246206 parasite (brine shrimp); hypersaline                                      | 16,06  | 16,08  | 421  | 48    | 1497           | 454; illumina MiSeq        |
| Cyberlindnera fabianii             | Ascomycota | Saccharomycotina | Saccharomycetes | Saccharomycetidae | Saccharomycetales | Metschnikowiaceae  | 277          | Gp0037508 | JGI             | 179032 biocontrol (spoilage control)                                             | 24,482 | 700,00 | 8430 |       | 45,5           | illumina HiSeq             |
| Cyberlindnera jadinii              | Ascomycota | Saccharomycotina | Saccharomycetes | Saccharomycetidae | Saccharomycetales | Phaffomycetaceae   | JCM 3601     | Gp0144028 | BCGI01          | 313787 industrial importance (waste water treatment; alcoholic fermentation)     | 12,3   | 223,00 | 53   | 12    | 44,2           | HiSeq 2500                 |
| Brettanomyces (Dekkera) bruxelleri | Ascomycota | Saccharomycotina | Saccharomycetes | Saccharomycetidae | Saccharomycetales | Phaffomycetaceae   | NRRC 0988    | Gp0038874 | BAEL01          | 167219 industrial importance                                                     | 14,27  | 20,00  | 1163 |       | 46 454; Sanger |                            |
| Brettanomyces anomalus             | Ascomycota | Saccharomycotina | Saccharomycetes | Saccharomycetidae | Saccharomycetales | Pichiaceae         | CBS 2499     | Gp0005465 | AHMD01          | 76499 industrial importance                                                      | 13,37  | 127,50 | 1374 | 84    | 5600           | 40,3 454; illumina         |
| Hyphopichia burtonii               | Ascomycota | Saccharomycotina | Saccharomycetes | Saccharomycetidae | Saccharomycetales | Pichiaceae         | YV396        | Gp0120591 | LCTY01          | 281311 industrial importance (fermentative yeast)                                | 12,88  | 100,00 | 280  | 30    | 39,9           | illumina HiSeq             |
| Nakazawaella peltata               | Ascomycota | Saccharomycotina | Saccharomycetes | Saccharomycetidae | Saccharomycetales | Pichiaceae         | NRRL Y-1933  | Gp0009550 | JGI             | 207851 spoilage yeast                                                            | 12,4   | 50,40  | 105  | 27    | 6002           | 454; illumina              |
| Ogataea methanolica                | Ascomycota | Saccharomycotina | Saccharomycetes | Saccharomycetidae | Saccharomycetales | Pichiaceae         | JCM 9829     | Gp0144049 | BCGO01          | 313795 fermentation                                                              | 11,65  | 239,00 | 34   | 11    | 40,5           | HiSeq 2500                 |
| Ogataea polymorpha                 | Ascomycota | Saccharomycotina | Saccharomycetes | Saccharomycetidae | Saccharomycetales | Pichiaceae         | JCM 10240    | Gp0143979 | BCKW01          | 313882 industrial importance (methylotrophic )                                   | 15,1   | 248,00 | 168  | 32    | 36,2           | HiSeq 2500                 |
| Pichia kudriavzevii                | Ascomycota | Saccharomycotina | Saccharomycetes | Saccharomycetidae | Saccharomycetales | Pichiaceae         | BV4329       | Gp0109098 | BKNV01          | 263660 industrial importance (methylotrophic )                                   | 8,89   | 20,00  | 66   |       | 47,7           | 454 GS FLX; GALix          |
| Pichia membranifaciens             | Ascomycota | Saccharomycotina | Saccharomycetes | Saccharomycetidae | Saccharomycetales | Pichiaceae         | NRRL Y-2026  | Gp0107454 | BBOI01          | 260583 spoilage yeast                                                            | 10,18  | 45,00  | 669  |       | 7107           | 38,5                       |
| Eremothecium sinecaudum            | Ascomycota | Saccharomycotina | Saccharomycetes | Saccharomycetidae | Saccharomycetales | Pichiaceae         | NRRL Y-2026  | Gp0007246 | JGI             | 52937 spoilage yeast; contaminant                                                | 11,58  | 38,95  | 279  | 11    | 5560           |                            |
| Kazachstania africana              | Ascomycota | Saccharomycotina | Saccharomycetes | Saccharomycetidae | Saccharomycetales | Saccharomycetaceae | ATCC 58844   | Gp0150734 | JGI             | 310026 industrial importance (oxylipin synthesis)                                | 8,92   |        | 7    | 7     | 4536           | 40,13                      |
| Kazachstania naganishii            | Ascomycota | Saccharomycotina | Saccharomycetes | Saccharomycetidae | Saccharomycetales | Saccharomycetaceae | CBS 2517     | Gp0038942 | JGI             | 70967 uncertain                                                                  | 11,13  |        | 34   |       |                |                            |

|                                    |            |                  |                       |                         |                         |                          |                   |           |                 |        |                                                                           |        |        |      |     |      |      |                |
|------------------------------------|------------|------------------|-----------------------|-------------------------|-------------------------|--------------------------|-------------------|-----------|-----------------|--------|---------------------------------------------------------------------------|--------|--------|------|-----|------|------|----------------|
| Hanseniaspora uvarum               | Ascomycota | Saccharomycotina | Saccharomycetes       | Saccharomycetidae       | Saccharomycetales       | Saccharomycodaceae       | 34-9              | Gp0097581 | JPPO02          | 254213 | saprotroph                                                                | 8,1    | 234,00 | 103  | 41  | 4061 | 31,6 | illumina HiSeq |
| Hanseniaspora valbyensis           | Ascomycota | Saccharomycotina | Saccharomycetes       | Saccharomycetidae       | Saccharomycetales       | Saccharomycodaceae       | NRRL Y-1626       | Gp0007245 | JGI             | 64991  | traditional use                                                           | 11,46  | 53,00  | 1163 | 647 | 4800 | 454  | illumina       |
| Hanseniaspora vineae               | Ascomycota | Saccharomycotina | Saccharomycetes       | Saccharomycetidae       | Saccharomycetales       | Saccharomycodaceae       | T02/19AF          | Gp0090029 | JFAV02          | 238564 | industrial importance                                                     | 11,383 | 121,00 | 305  |     |      | 37,4 | illumina GAltx |
| Arthroascus fermentans             | Ascomycota | Saccharomycotina | Saccharomycetes       | Saccharomycetidae       | Saccharomycetales       | Saccharomycopsidaceae    | 17710 v1.0        |           | 1040501         |        | fermenting yeast                                                          | 14,37  | 89,20  | 115  | 46  | 5449 |      | illumina       |
| Saccharomycopsis malanga           | Ascomycota | Saccharomycotina | Saccharomycetes       | Saccharomycetidae       | Saccharomycetales       | Saccharomycopsidaceae    | JCM 7620          | Gp0144036 | BCGJ01          | 313788 | uncertain                                                                 | 16,72  | 190,00 | 229  | 44  |      | 37,8 | HiSeq 2500     |
| Sugiyamaella (Candida) lignohabita | Ascomycota | Saccharomycotina | Saccharomycetes       | Saccharomycetidae       | Saccharomycetales       | Trichomonasaceae         | CBS 10342         |           |                 | 308900 | industrial importance (biorefinery)                                       | 15,98  |        |      | 5   | 5135 | 44,9 |                |
| Sugiyamaella americana             | Ascomycota | Saccharomycotina | Saccharomycetes       | Saccharomycetidae       | Saccharomycetales       | Trichomonasaceae         | NRRL YB-2067 v1.0 |           | 1040555         |        | insect-associated (beetles)                                               | 16,48  | 100,00 | 223  | 52  | 6288 |      | illumina       |
| Sympodiomyces attinorum            | Ascomycota | Saccharomycotina | Saccharomycetes       | Saccharomycetidae       | Saccharomycetales       | Trichomonasaceae         | NRRL Y-27639 v1.0 |           | 1040561         |        | insect-associated (ants)                                                  | 14,02  | 89,30  | 66   | 14  | 6184 |      | illumina       |
| Trichomonascus petasosporus        | Ascomycota | Saccharomycotina | Saccharomycetes       | Saccharomycetidae       | Saccharomycetales       | Trichomonasaceae         | NRRL YB-2093      | Gp0150175 |                 | 332934 | saprotrophic yeast                                                        | 14,46  | 91,90  | 175  | 79  |      |      | illumina       |
| Wickerhamiella domercqiae          | Ascomycota | Saccharomycotina | Saccharomycetes       | Saccharomycetidae       | Saccharomycetales       | Trichomonasaceae         | JCM 9478          | Gp0144044 | BCGM01          | 313791 | pharmaceutical importance (anticancer sphingolipid producing)             | 8,47   | 344,00 | 50   | 4   |      | 48,4 | HiSeq 2500     |
| Wickerhamomyces anomalus           | Ascomycota | Saccharomycotina | Saccharomycetes       | Saccharomycetidae       | Saccharomycetales       | Wickerhamomycetaceae     | NRRL Y-366        | Gp0008963 | AEIO2           | 52059  | industrial importance (wine yeast); spoilage; biocontrol (mycotoxic compo | 14,15  | 97,57  | 207  | 46  | 6423 | 35,1 | 454; illumina  |
| Wickerhamomyces ciferrii           | Ascomycota | Saccharomycotina | Saccharomycetes       | Saccharomycetidae       | Saccharomycetales       | Wickerhamomycetaceae     | NRRL Y-1031       | Gp0038328 | CAIF01          | 169887 | pharmaceutical importance (sphingolipid biosynthesis pathway)             | 15,901 |        | 364  |     | 6702 | 30,4 |                |
| Pneumocystis jirovecii (carinii)   | Ascomycota | Taphrinomycotina | Pneumocystidomycetes  | Pneumocystidomycetidae  | Pneumocystidales        | Pneumocystidaceae        | SE8               | Gp0038459 | CAKM01          | 68827  | parasite (obligate); colonizes lungs (pneumonia)                          | 8,15   | 675,50 | 355  | 355 | 3520 | 28,4 | 454; illumina  |
| Pneumocystis murina                | Ascomycota | Taphrinomycotina | Pneumocystidomycetes  | Pneumocystidomycetidae  | Pneumocystidales        | Pneumocystidaceae        | B123              | Gp0037048 | AFWA01          | 70803  | parasite (obligate); colonizes lungs (pneumonia)                          | 7,451  | 214,90 | 17   |     | 3609 | 26,9 | 454; illumina  |
| Schizosaccharomyces cryophilus     | Ascomycota | Taphrinomycotina | Schizosaccharomycetes | Schizosaccharomycetidae | Schizosaccharomycetales | Schizosaccharomycetaceae | OY26              | Gp0008116 | ACQJ02          | 38373  | uncertain; yeast (fission)                                                | 11,56  | 51,00  | 202  | 34  | 5180 | 37,7 | 454            |
| Schizosaccharomyces japonicus      | Ascomycota | Taphrinomycotina | Schizosaccharomycetes | Schizosaccharomycetidae | Schizosaccharomycetales | Schizosaccharomycetaceae | yFS275            | Gp0002702 | AATM02          | 13640  | model organism; yeast (fission)                                           | 11,73  | 9,00   | 87   | 32  | 4878 | 44   | Sanger         |
| Schizosaccharomyces octosporus     | Ascomycota | Taphrinomycotina | Schizosaccharomycetes | Schizosaccharomycetidae | Schizosaccharomycetales | Schizosaccharomycetaceae | yFS286            | Gp0002701 | ABHY03          | 13639  | uncertain; yeast (fission)                                                | 11,63  | 39,00  | 18   | 5   | 4986 | 37,5 | Sanger         |
| Schizosaccharomyces pombe          | Ascomycota | Taphrinomycotina | Schizosaccharomycetes | Schizosaccharomycetidae | Schizosaccharomycetales | Schizosaccharomycetaceae | 972h-             | Gp0000701 | GCA_000002945.2 | 13836  | model organism                                                            | 12,591 |        | 8    | 4   | 6953 | 36   |                |
| Saitoella complicata               | Ascomycota | Taphrinomycotina | Taphrinomycetes       | Taphrinomycetidae       | Taphrinales             | Protomycetaceae          | NRRL Y-17804      | Gp0038417 | BACD02          | 63243  | saprotroph                                                                | 14,14  | 52,49  | 74   | 35  | 7034 | 52,5 | 454; illumina  |
| Taphrina deformans                 | Ascomycota | Taphrinomycotina | Taphrinomycetes       | Taphrinomycetidae       | Taphrinales             | Taphrinaceae             | PYCC 5710         | Gp0038420 | CAHR02          | 74523  | plant pathogen (peach)                                                    | 13,394 |        | 517  | 403 | 4668 | 49,5 |                |
| Taphrina flavorubra                | Ascomycota | Taphrinomycotina | Taphrinomycetes       | Taphrinomycetidae       | Taphrinales             | Taphrinaceae             | JCM 22207         | Gp0103452 | BAVW01          | 257906 | plant pathogen (Prunus fruit)                                             | 15,73  | 200,00 | 1266 | 865 |      | 49,6 | illumina HiSeq |
| Taphrina populina                  | Ascomycota | Taphrinomycotina | Taphrinomycetes       | Taphrinomycetidae       | Taphrinales             | Taphrinaceae             | JCM 22190         | Gp0124247 | BAVX01          | 271741 | plant pathogen (cottonwood)                                               | 12     | 200,00 | 408  | 335 |      | 47,4 | illumina HiSeq |
| Taphrina wiesneri                  | Ascomycota | Taphrinomycotina | Taphrinomycetes       | Taphrinomycetidae       | Taphrinales             | Taphrinaceae             | JCM 22204         | Gp0103453 | BAVU01          | 257904 | plant pathogen (cherry trees)                                             | 13,1   | 200,00 | 359  | 225 |      | 48,1 | illumina HiSeq |

## Sequenced Basidiomycota species

| SPECIES                       | PHYLUM        | SUBPHYLUM       | CLASS          | Classification   |            |                  | Strain     | GOLD Accession | GENOME Accession | NCBI Project ID | Significance                                         | Genome statistics |             |              |                |         |       |                       |                               |
|-------------------------------|---------------|-----------------|----------------|------------------|------------|------------------|------------|----------------|------------------|-----------------|------------------------------------------------------|-------------------|-------------|--------------|----------------|---------|-------|-----------------------|-------------------------------|
|                               |               |                 |                | SUBCLASS         | ORDER      | FAMILY           |            |                |                  |                 |                                                      | Size (Mb)         | coverage    | # of contigs | # of scaffolds | # genes | GC    | Technology            |                               |
| Agaricus bisporus             | Basidiomycota | Agaricomycotina | Agaricomycetes | Agaricomycetidae | Agaricales | Agaricaceae      | JB137-58   | Gp0003193      | JGI              | 61007           | edible; saprotroph                                   | 30,2              |             | 46           | 254            | 29      | 10438 | 454; Illumina         |                               |
| Leucoagaricus gongylophorus   | Basidiomycota | Agaricomycotina | Agaricomycetes | Agaricomycetidae | Agaricales | Agaricaceae      | Ac12       | Gp0042023      | ANIS01           | 179280          | insect symbiont                                      | 101,58            |             | 15           | 92785          | 92785   |       | 35,1                  |                               |
| Leucoagaricus sp. Symb_Cos    | Basidiomycota | Agaricomycotina | Agaricomycetes | Agaricomycetidae | Agaricales | Agaricaceae      | Sym_Cos    | Gp0143237      | LSDH01           | 295288          | insect-associated (ants)                             | 119,03            |             | 27           | 33952          | 20457   | 12136 | 44,4                  | Illumina HiSeq                |
| Macrolepiota fuliginosa       | Basidiomycota | Agaricomycotina | Agaricomycetes | Agaricomycetidae | Agaricales | Agaricaceae      | MF-152     | Gp0024456      | JGI              | 218801          | saprotroph                                           | 46,4              | 165,4       | 4852         | 3478           | 15801   |       | Illumina HiSeq        |                               |
| Amanita brunneascens          | Basidiomycota | Agaricomycotina | Agaricomycetes | Agaricomycetidae | Agaricales | Amanitaceae      | BX004      | Gp0096753      | JNHV01           | 236753          | mycorrhizal                                          | 57,56             |             | 25           | 24247          | 17039   |       | Illumina HiSeq        |                               |
| Amanita inopinata             | Basidiomycota | Agaricomycotina | Agaricomycetes | Agaricomycetidae | Agaricales | Amanitaceae      | Kibby_2008 | Gp0096754      | JNHV01           | 236757          | saprotroph                                           | 22,12             |             | 900          | 6054           | 5912    |       | 47,9                  | Illumina HiSeq                |
| Amanita jacksonii             | Basidiomycota | Agaricomycotina | Agaricomycetes | Agaricomycetidae | Agaricales | Amanitaceae      | TRTC16861  | Gp0067868      | AYNK01           | 226613          | ectomycorrhizal                                      | 30,9              |             | 100          | 5557           | 4516    |       |                       |                               |
| Amanita muscaria var. guessio | Basidiomycota | Agaricomycotina | Agaricomycetes | Agaricomycetidae | Agaricales | Amanitaceae      | BX008      | Gp0096755      | JNHV01           | 236758          | ectomycorrhizal                                      | 67,64             |             | 250          | 23945          | 17515   | 18091 | 47,5                  | Illumina HiSeq                |
| Amanita polypyrans            | Basidiomycota | Agaricomycotina | Agaricomycetes | Agaricomycetidae | Agaricales | Amanitaceae      | BW_CC      | Gp0096756      | JNHV01           | 236755          | ectomycorrhizal                                      | 23,56             |             | 150          | 6521           | 5295    |       | 47,3                  |                               |
| Amanita thiersii              | Basidiomycota | Agaricomycotina | Agaricomycetes | Agaricomycetidae | Agaricales | Amanitaceae      | Skay4041   | Gp0005144      | JGI              | 82749           | saprotroph                                           | 33,69             |             | 135,9        | 2164           | 1446    | 10354 |                       |                               |
| Bolbitius vitellinus          | Basidiomycota | Agaricomycotina | Agaricomycetes | Agaricomycetidae | Agaricales | Bolbitiaceae     | SZMC-NL-1  | Gp00125832     | 1097215          | 334996          | saprotroph                                           | 51,24             |             | 65           | 428            | 428     | 14483 |                       | PacBio                        |
| Clavaria fumosa               | Basidiomycota | Agaricomycotina | Agaricomycetes | Agaricomycetidae | Agaricales | Clavariaceae     | KM175152   | Gp0145123      | CVRD01           | 287237          | saprotroph                                           | 70,47             |             |              | 114209         | 111201  |       | 55,7                  | Illumina HiSeq                |
| Cortinariu glaucopus          | Basidiomycota | Agaricomycotina | Agaricomycetes | Agaricomycetidae | Agaricales | Cortinariaceae   | AT 2004 27 | Gp0019356      | JGI              | 213332          | ectomycorrhizal                                      | 63,45             | 107,00      | 2103         | 769            | 20377   |       |                       | Illumina HiSeq                |
| Hebeloma cylindrosporum       | Basidiomycota | Agaricomycotina | Agaricomycetes | Agaricomycetidae | Agaricales | Cortinariaceae   | h7         | Gp0005977      | JGI              | 207849          | mycorrhizal                                          | 38,23             |             | 113          | 526            | 176     | 15382 |                       | Illumina; PacBio; 454; Sanger |
| Crepidotus sp. BD-2015        | Basidiomycota | Agaricomycotina | Agaricomycetes | Agaricomycetidae | Agaricales | Crepidotaceae    | MCA163     | Gp0145126      | CVRE01           | 287237          | uncertain                                            | 70,26             |             |              | 793879         | 182032  |       | 54,3                  | IonTorrent                    |
| Crepidotus variabilis         | Basidiomycota | Agaricomycotina | Agaricomycetes | Agaricomycetidae | Agaricales | Crepidotaceae    | CBS 506.95 | v1.0           | 1056714          |                 | saprotroph                                           | 38,58             | 111,20      | 1097         | 435            | 14573   |       |                       | Illumina                      |
| Fistulina hepatica            | Basidiomycota | Agaricomycotina | Agaricomycetes | Agaricomycetidae | Agaricales | Fistulinaceae    | ATCC 6442  | Gp0017025      | JYF01            | 196028          | saprotroph; wood-decay                               | 33,85             |             | 137,9        | 914            | 588     | 11391 | 50,2                  | Illumina; PacBio              |
| Laccaria amethystina          | Basidiomycota | Agaricomycotina | Agaricomycetes | Agaricomycetidae | Agaricales | Hydnangiaceae    | LaAM-08-1  | Gp0010080      | JGI              | 196025          | ectomycorrhizal                                      | 52,2              |             | 156,5        | 4756           | 1299    | 21066 | 454; Illumina HiSeq   |                               |
| Laccaria bicolor              | Basidiomycota | Agaricomycotina | Agaricomycetes | Agaricomycetidae | Agaricales | Hydnangiaceae    | S238N-H82  | Gp0002644      | JGI              | 19043           | ectomycorrhizal                                      | 60,71             |             | 9,90         | 584            | 55      | 23132 | 47                    | Sanger                        |
| Hypsizygus marmoreus          | Basidiomycota | Agaricomycotina | Agaricomycetes | Agaricomycetidae | Agaricales | Lyophyllaceae    | 51987-8    | Gp0143018      | LUEZ01           | 312409          | saprotroph; edible                                   | 41,63             | 287,30      | 999          | 340            | 15561   | 48,7  | Illumina HiSeq; MiSeq |                               |
| Termitomyces sp. J132         | Basidiomycota | Agaricomycotina | Agaricomycetes | Agaricomycetidae | Agaricales | Lyophyllaceae    | J132       | Gp0076039      | JDCH01           | 193471          | insect-cultivated fungus                             | 67,3              |             | 81           | 4863           | 2335    | 11398 | 46,3                  | Illumina HiSeq                |
| Marasmius fiardii             | Basidiomycota | Agaricomycotina | Agaricomycetes | Agaricomycetidae | Agaricales | Marasmiaceae     | PR-910     | Gp0035332      | 1016747          | 200608          | uncertain                                            | 59,45             |             | 96,1         | 2986           | 1124    | 17098 |                       | Illumina HiSeq                |
| Moniliophthora perniciosa     | Basidiomycota | Agaricomycotina | Agaricomycetes | Agaricomycetidae | Agaricales | Marasmiaceae     | FA553      | Gp0002607      | ABRE01           | 28951           | plant pathogen (cacao)                               | 26,663            |             |              | 25056          | 16443   | 48    | Sanger                |                               |
| Moniliophthora roreri         | Basidiomycota | Agaricomycotina | Agaricomycetes | Agaricomycetidae | Agaricales | Marasmiaceae     | MCA 2997   | Gp0049167      | AWSO01           | 213737          | plant pathogen (pod rot of cacao)                    | 52,204            | 15,00       |              | 3280           | 17910   |       | 46,9                  | 454; Illumina                 |
| Mycena chlorophos             | Basidiomycota | Agaricomycotina | Agaricomycetes | Agaricomycetidae | Agaricales | Mycenaceae       | BAYG01     | Gp0149686      |                  | 317219          | bioluminescent saprotroph                            | 43,6              |             | 420          | 25660          | 17445   |       | 55,6                  | Illumina                      |
| Mycena galopus                | Basidiomycota | Agaricomycotina | Agaricomycetes | Agaricomycetidae | Agaricales | Mycenaceae       | ATCC-6205  | Gp0035333      | 1016743          | 196020          | saprotroph                                           | 211,36            | 80,09557307 | 1364         | 1364           | 49694   |       | PacBio                |                               |
| Panellus stipticus            | Basidiomycota | Agaricomycotina | Agaricomycetes | Agaricomycetidae | Agaricales | Mycenaceae       | LUM        | Gp0046822      | 1018599          | 245622          | saprotroph                                           | 53,17             |             | 112,20       | 3730           | 1562    | 15860 |                       | Illumina                      |
| Crucibulum laeve              | Basidiomycota | Agaricomycotina | Agaricomycetes | Agaricomycetidae | Agaricales | Nidulariaceae    | CBS 166.37 | v1.0           | 1059303          |                 | saprotroph                                           | 44,73             | 106,60      | 1536         | 574            | 14218   |       |                       | Illumina                      |
| Cyathus striatus              | Basidiomycota | Agaricomycotina | Agaricomycetes | Agaricomycetidae | Agaricales | Nidulariaceae    | AH 40144   | Go0111615      | 1056738          | 333390          | saprotroph; bird's nest fungus                       | 91,18             |             |              | 1562           | 1562    | 23513 |                       | Illumina; PacBio              |
| Lentinula edodes              | Basidiomycota | Agaricomycotina | Agaricomycetes | Agaricomycetidae | Agaricales | Omphalotaceae    | L-54       | Gp0006482      |                  | 17581           | edible                                               | 40,2              |             | 11,00        | 767            | 13382   |       | 454; SOLiD            |                               |
| Omphalotus olearius           | Basidiomycota | Agaricomycotina | Agaricomycetes | Agaricomycetidae | Agaricales | Omphalotaceae    | VT 653.13  | Gp0039058      | AHIW01           | 79063           | bioluminescent mushroom                              | 28,15             |             | 85,3         | 1535           | 868     | 8171  | 47,4                  | Illumina                      |
| Rhodocollybia butyracea       | Basidiomycota | Agaricomycotina | Agaricomycetes | Agaricomycetidae | Agaricales | Omphalotaceae    | AH 40177   | v1.0           |                  |                 | saprotroph                                           | 96,28             |             |              | 1482           | 1482    | 22870 |                       | PacBio                        |
| Armillaria gallica            | Basidiomycota | Agaricomycotina | Agaricomycetes | Agaricomycetidae | Agaricales | Physalaciaceae   | AR21-2     | Gp0072259      | JGI              | 242129          | saprotroph; pathogen (root rot; opportunistic tree i | 85,34             |             | 41,8         | 1529           | 319     | 25704 |                       | Illumina HiSeq                |
| Armillaria ostoyae            | Basidiomycota | Agaricomycotina | Agaricomycetes | Agaricomycetidae | Agaricales | Physalaciaceae   | 28-4       | v1.0           | 1032462          |                 | plant pathogen; conifer root rot (parasitic or sapro | 58,01             |             | 67,6         | 693            | 229     | 20811 |                       | PacBio                        |
| Cylindrobasidium torrendii    | Basidiomycota | Agaricomycotina | Agaricomycetes | Agaricomycetidae | Agaricales | Physalaciaceae   | FP15055    | ss-Gp0034230   | JNEL01           | 196018          | saprotroph                                           | 31,57             |             | 134,3        | 1222           | 1149    | 13940 |                       | Illumina HiSeq                |
| Flammulina velutipes          | Basidiomycota | Agaricomycotina | Agaricomycetes | Agaricomycetidae | Agaricales | Physalaciaceae   | W23        | Gp0041101      | AQHU01           | 191864          | model organism                                       | 35,64             |             | 37,20        | 513            | 11      | 49,8  |                       | 454                           |
| Guyanagaster necrorhiza       | Basidiomycota | Agaricomycotina | Agaricomycetes | Agaricomycetidae | Agaricales | Physalaciaceae   | MCA 3950   | Gp0036668      |                  | 234669          | saprotroph                                           | 53,69             |             | 81,5         | 656            | 168     |       |                       | Illumina HiSeq                |
| Oudemansiella mucida          | Basidiomycota | Agaricomycotina | Agaricomycetes | Agaricomycetidae | Agaricales | Physalaciaceae   | CBS 558.79 | Gp0111942      | 1056768          |                 | saprotroph; white-rot                                | 61,73             | 131,00      | 1386         | 1386           | 18562   |       |                       | PacBio                        |
| Pleurotus eryngii             | Basidiomycota | Agaricomycotina | Agaricomycetes | Agaricomycetidae | Agaricales | Pleurotaceae     | ATCC 90797 | v1.0           | 1056780          |                 | bioremediation; edible                               | 44,61             |             | 96,7         | 1684           | 609     | 15960 |                       |                               |
| Pleurotus ostreatus           | Basidiomycota | Agaricomycotina | Agaricomycetes | Agaricomycetidae | Agaricales | Pleurotaceae     | PC15       | Gp0017839      | AYUK01           | 81933           | saprotrophic (white rot)                             | 34,342            |             | 8,7          | 13             | 12      | 12460 | 50,9                  | Sanger                        |
| Pluteus cervinus              | Basidiomycota | Agaricomycotina | Agaricomycetes | Agaricomycetidae | Agaricales | Pluteaceae       | NL-1719    | v1.0           | 1063679          |                 | saprotroph                                           | 52,19             | 138,20      | 3329         | 1887           | 19818   |       |                       | Illumina                      |
| Volvariella volvacea          | Basidiomycota | Agaricomycotina | Agaricomycetes | Agaricomycetidae | Agaricales | Pluteaceae       | Pyd21      | Gp0038369      | ANCH01           | 171553          | edible mushroom                                      | 36,626            |             | 90,00        | 2304           |         |       | 48,8                  | Illumina GAI                  |
| Coprinellus micaceus          | Basidiomycota | Agaricomycotina | Agaricomycetes | Agaricomycetidae | Agaricales | Psathyrellaceae  | FP101781   | v Gp0072267    | 1031312          | 247835          | saprotroph                                           | 77,39             |             | 74,8         | 704            | 704     | 23559 |                       | PacBio                        |
| Coprinellus pelliculosus      | Basidiomycota | Agaricomycotina | Agaricomycetes | Agaricomycetidae | Agaricales | Psathyrellaceae  | TEP2b      |                | 1074556          |                 | coprophilous                                         | 41,56             |             | 167,7        | 2262           | 1355    | 16047 |                       | Illumina                      |
| Coprinopsis cinerea           | Basidiomycota | Agaricomycotina | Agaricomycetes | Agaricomycetidae | Agaricales | Psathyrellaceae  | okayama7#  | Gp0002605      | AACS02           | 1447            | model organism                                       | 36,19             |             | 10           | 68             | 68      | 13657 | 52                    | Sanger                        |
| Coprinopsis marcescibilis     | Basidiomycota | Agaricomycotina | Agaricomycetes | Agaricomycetidae | Agaricales | Psathyrellaceae  | CBS121175  | Gp0092282      | 1040687          |                 | coprophilous                                         | 38,91             |             | 94,40        | 1269           | 817     | 14632 |                       | Illumina                      |
| Pterula gracilis              | Basidiomycota | Agaricomycotina | Agaricomycetes | Agaricomycetidae | Agaricales | Pterulaceae      | CBS309.79  | v1.0           | 1019505          |                 | developmentally interesting                          | 34,77             |             | 88,4         | 852            | 221     | 12873 |                       | Illumina                      |
| Schizophyllum commune         | Basidiomycota | Agaricomycotina | Agaricomycetes | Agaricomycetidae | Agaricales | Schizophyllaceae | H4-8       | Gp0003179      | ADMJ01           | 32757           | saprotroph; opportunistic human pathogen             | 38,67             |             | 8,29         | 72             | 25      | 16319 | 57,5                  | Sanger                        |
| Galerina marginata            | Basidiomycota | Agaricomycotina | Agaricomycetes | Agaricomycetidae | Agaricales | Strophariaceae   | CBS 339.88 | Gp0017026      | AYUM01           | 207683          | saprotroph (white rot); toxic                        | 59,42             |             | 34,30        | 1272           | 414     | 21461 | 48                    | 454; Illumina                 |
| Gymnopilus chrysopellus       | Basidiomycota | Agaricomycotina | Agaricomycetes | Agaricomycetidae | Agaricales | Strophariaceae   | PR-1187    | Gp0033092      | JGI              | 196058          | saprotroph                                           | 47,22             |             | 142,5        | 2046           | 1949    | 18193 |                       | Illumina HiSeq                |
| Gymnopilus junonius           | Basidiomycota | Agaricomycotina | Agaricomycetes | Agaricomycetidae | Agaricales | Strophariaceae   | AH 44721   | Gp0111649      | 1056762          |                 | saprotroph; white-rot; hallucinogenic                | 59,46             |             | 101,97       | 1174           | 16444   |       |                       | Illumina; PacBio              |
| Hypholoma sublateritium       | Basidiomycota | Agaricomycotina | Agaricomycetes | Agaricomycetidae | Agaricales | Strophariaceae   | FD-334     | SS-4Gp0010136  |                  | 70685           | industrial importance                                | 48,03             |             | 152          | 1329           | 704     | 17911 | 51                    | 454; Illumina                 |
| Baeospora myosura             | Basidiomycota | Agaricomycotina | Agaricomycetes | Agaricomycetidae | Agaricales | Tricholomataceae | KM189292   | Gp0145125      | CEMG01           | 287237          | saprotroph                                           | 61,02             |             |              | 190914         | 1824890 |       | 50,5                  |                               |
| Gymnopus androsaceus          | Basidiomycota | Agaricomycotina | Agaricomycetes | Agaricomycetidae | Agaricales | Tricholomataceae | JB14       | Gp0046757      | JGI              | 234428          | saprotrophic (white rot); important in carbon cycle  | 89,15             |             | 2519         | 2516           | 29375   |       |                       | Illumina                      |
| Gymnopus luxurians            | Basidiomycota | Agaricomycotina | Agaricomycetes | Agaricomycetidae | Agaricales | Tricholomataceae | FD-317     | M1 Gp0010138   | JGI              | 68535           | saprotroph                                           | 66,28             |             | 29,73        | 1848           | 383     | 22057 | 45                    | 454; Illumina                 |
| Lepista nuda                  | Basidiomycota | Agaricomycotina | Agaricomycetes | Agaricomycetidae | Agaricales | Tricholomataceae | CBS 247.69 | v1.0           | 1056744          |                 | saprotroph; edible                                   | 43,49             |             | 93,4         | 2234           | 822     | 14880 |                       | Illumina                      |
| Macrocyttidia cucumis         | Basidiomycota | Agaricomycotina | Agaricomycetes | Agaricomycetidae | Agaricales | Tricholomataceae | KM177596   | Gp0145124      | CEMH01           | 287237          | saprotroph                                           | 46,75             |             |              | 210056         | 204508  |       | 48,8                  |                               |
| Tricholoma matsutake          | Basidiomycota | Agaricomycotina | Agaricomycetes | Agaricomycetidae | Agaricales | Tricholomataceae | 945        |                |                  |                 |                                                      |                   |             |              |                |         |       |                       |                               |



| Species                         | Genus         | Family          | Order          | Class            | Accession       | Host              | Host Type             | Accession      | Host   | Host Type                                              | Accession | Host   | Host Type | Accession | Host    | Host Type                  |
|---------------------------------|---------------|-----------------|----------------|------------------|-----------------|-------------------|-----------------------|----------------|--------|--------------------------------------------------------|-----------|--------|-----------|-----------|---------|----------------------------|
| Dendrothele bispora             | Basidiomycota | Agaricomycotina | Agaricomycetes | Incertae sedis   | Corticiales     | Corticaceae       | CBS 962.96 Gp0034229  | JGI            | 196017 | saprotroph                                             | 130,65    | 103    | 6351      | 3942      | 33645   | illumina HiSeq             |
| Limonomycetes culmigenus        | Basidiomycota | Agaricomycotina | Agaricomycetes | Incertae sedis   | Corticiales     | Corticaceae       | CBS 661.85            |                |        | plant pathogen (turfgrass)                             | 36,1      | 211    | 8889      |           | 57,8    |                            |
| Punctularia strigosozonata      | Basidiomycota | Agaricomycotina | Agaricomycetes | Incertae sedis   | Corticiales     | Corticaceae       | HHB-11173 Gp0007184   | AEGM01         | 52407  | saprotrophic (white rot)                               | 34,17     | 45,55  | 1327      | 195       | 11538   | 55,2 Sanger; 454; Illumina |
| Sphaerobolus stellatus          | Basidiomycota | Agaricomycotina | Agaricomycetes | Phallomycetidae  | Gaeastrales     | Gaeastraceae      | SS14 Gp0017850        |                | 207858 | saprotroph                                             | 176,37    | 57,5   | 13156     | 1460      | 35274   | illumina                   |
| Sclerogaster hysterangioides    | Basidiomycota | Agaricomycotina | Agaricomycetes | Phallomycetidae  | Gaeastrales     | Sclerogastreae    | SCL2.BST              | 1019437        | 256708 | uncertain                                              | 124,26    |        | 901       | 901       | 16656   | illumina; PacBio           |
| Gloeophyllum trabeum            | Basidiomycota | Agaricomycotina | Agaricomycetes | Incertae sedis   | Gloeophyllales  | Gloeophyllaceae   | ATCC 11535; Gp0005491 | AFVP01         | 64553  | saprotroph (brown rot)                                 | 37,18     | 54,00  | 1454      | 442       | 11885   | 53,2 Sanger; 454; Illumina |
| Helocybe sulcata                | Basidiomycota | Agaricomycotina | Agaricomycetes | Incertae sedis   | Gloeophyllales  | Gloeophyllaceae   | OMC1185 v1.0          | 1047715        |        | saprotroph (brown rot)                                 | 31,95     | 82,2   | 491       |           | 12570   |                            |
| Neolentinus lepideus            | Basidiomycota | Agaricomycotina | Agaricomycetes | Incertae sedis   | Gloeophyllales  | Gloeophyllaceae   | HHB14362; Gp0025087   | JGI            | 196054 | saprotroph (brown rot)                                 | 35,64     | 92,4   | 1215      | 331       | 13164   | illumina HiSeq             |
| Gautieria morcheliformis        | Basidiomycota | Agaricomycotina | Agaricomycetes | Phallomycetidae  | Gomphales       | Gomphaceae        | GMNE.BST v1.0         | 1019425        |        | uncertain, hypogean                                    | 122,81    |        | 1220      | 1220      | 20331   | PacBio                     |
| Ramaria acris                   | Basidiomycota | Agaricomycotina | Agaricomycetes | Phallomycetidae  | Gomphales       | Gomphaceae        | UT-36052-T; Gp0035336 | JGI            | 196021 | ectomycorrhizal                                        | 105,46    | 78,90  | 5927      | 1553      | 19287   | illumina                   |
| Fomitiporia mediterranea        | Basidiomycota | Agaricomycotina | Agaricomycetes | Incertae sedis   | Hymenochaetales | Hymenochaetaeae   | MF3/22 Gp0006428      | AEJ01          | 56107  | saprotrophic (white rot)                               | 63,35     | 39,35  | 5766      | 1412      | 11333   | 40,8 Sanger; 454; Illumina |
| Onnia scaura                    | Basidiomycota | Agaricomycotina | Agaricomycetes | Incertae sedis   | Hymenochaetales | Hymenochaetaeae   | P-53A Gp0035335       |                | 245618 | saprotroph; wood-decomposing                           | 37,1      | 88,8   | 2066      | 834       | 12895   | illumina HiSeq             |
| Phellinus noxius                | Basidiomycota | Agaricomycotina | Agaricomycetes | Incertae sedis   | Hymenochaetales | Hymenochaetaeae   | OVT-YTM/9 Gp0070880   | AYOR01         | 226629 | plant pathogen (broad host range, typically trees)     | 31,259    | 35,00  | 1434      |           |         | 41,6 Ion Torrent           |
| Porodaedalea chrysoloma         | Basidiomycota | Agaricomycotina | Agaricomycetes | Incertae sedis   | Hymenochaetales | Hymenochaetaeae   | FP-135951 Gp0033091   |                | 200594 | plant pathogen (conifer parasite; white pocket rot)    | 44,69     | 50,00  | 1684      | 496       | 13562   | illumina; PacBio           |
| Porodaedalea niemelaei          | Basidiomycota | Agaricomycotina | Agaricomycetes | Incertae sedis   | Hymenochaetales | Hymenochaetaeae   | PN71-100-H; Gp0072274 |                | 333975 | plant pathogen (conifer white rot)                     | 53,34     |        | 951       | 951       | 14467   | PacBio                     |
| Sanghuangporus baumii           | Basidiomycota | Agaricomycotina | Agaricomycetes | Incertae sedis   | Hymenochaetales | Hymenochaetaeae   | 821 Gp0150193         | LNZH02         | 304358 | pharmaceutical importance (medicinal mushroom)         | 31,64     | 186,00 | 339       | 217       | 8455    | 47,6 Illumina              |
| Rickenella fibula               | Basidiomycota | Agaricomycotina | Agaricomycetes | Incertae sedis   | Hymenochaetales | Rickenellaceae    | HBK330-10 v1.0        | 1064682        |        | saprotroph, probable                                   | 59,35     | 91,45  | 529       | 529       | 18997   | PacBio                     |
| Schizophora paradoxa            | Basidiomycota | Agaricomycotina | Agaricomycetes | Incertae sedis   | Hymenochaetales | Schizoporaceae    | KUC8140 Gp0036252     | JGI            | 239088 | wood-inhabiting                                        | 44,41     | 108    | 1342      | 1291      | 17098   | illumina HiSeq             |
| Jaapia argillanea               | Basidiomycota | Agaricomycotina | Agaricomycetes | Agaricomycetidae | Jaapiales       | Jaapiaceae        | MUC1 3360 Gp0012165   | AYUL01         | 207685 | saprotroph                                             | 45,05     | 20,58  | 1182      | 295       | 16419   | 49,8 454; illumina         |
| Mutinus elegans                 | Basidiomycota | Agaricomycotina | Agaricomycetes | Incertae sedis   | Phallales       | Phallaceae        | ME.BST v1.0           | 1019445        |        | saprotroph                                             | 52,78     |        | 3570      | 1095      | 14626   | illumina                   |
| Taiwanofungus camphoratus       | Basidiomycota | Agaricomycotina | Agaricomycetes | Incertae sedis   | Polyporales     | Coriolaceae       | S27 Gp0109109         | JNBV01         | 244959 | pharmaceutical importance (traditional medicine)       | 32,16     | 878,00 | 348       | 360       |         | 50,6 illumina GAllx; 454   |
| Trametes cinnabarina            | Basidiomycota | Agaricomycotina | Agaricomycetes | Incertae sedis   | Polyporales     | Coriolaceae       | DSM 3022 Gp0107556    | JSY01          | 261270 | saprotrophic (white rot)                               | 31,62     | 180,00 | 9648      | 10233     |         | 55,6 illumina HiSeq        |
| Trametes hirsuta                | Basidiomycota | Agaricomycotina | Agaricomycetes | Incertae sedis   | Polyporales     | Coriolaceae       | 072 Gp0124682         | LIYB01         | 271118 | saprotrophic (white rot)                               | 33,62     | 101,00 | 1022      | 140       |         | 56,8 illumina HiSeq; MiSeq |
| Trametes sp. AH28-2             | Basidiomycota | Agaricomycotina | Agaricomycetes | Incertae sedis   | Polyporales     | Coriolaceae       | AH28-2 Gp0124683      | LUIJ01         | 294859 | saprotrophic (white rot); industrial importance (lacc) | 38,9      | 100,00 | 502       | 306       |         | 58,8 illumina HiSeq        |
| Antrodia sinuosa                | Basidiomycota | Agaricomycotina | Agaricomycetes | Incertae sedis   | Polyporales     | Fomitopsidaceae   | LB1 Gp0019259         | JGI            | 196036 | saprotroph                                             | 30,17     | 128,10 | 1482      | 1387      | 11327   | illumina HiSeq             |
| Daedalea quercina               | Basidiomycota | Agaricomycotina | Agaricomycetes | Incertae sedis   | Polyporales     | Fomitopsidaceae   | L-15889 Gp0025092     | JGI            | 196055 | saprotroph                                             | 32,74     | 144,4  | 1025      | 357       | 12199   | illumina HiSeq             |
| Fomitopsis pinicola             | Basidiomycota | Agaricomycotina | Agaricomycetes | Incertae sedis   | Polyporales     | Fomitopsidaceae   | FP-58527 S; Gp0008479 | AEHC02         | 52941  | saprotroph (brown rot)                                 | 41,61     | 85,9   | 988       | 504       | 13885   | 55,8 Illumina; PacBio      |
| Laetiporus sulphureus           | Basidiomycota | Agaricomycotina | Agaricomycetes | Incertae sedis   | Polyporales     | Fomitopsidaceae   | 93-53 Gp0025315       | JGI            | 196057 | saprotroph                                             | 39,92     | 85,20  | 1207      | 403       | 13774   | illumina HiSeq             |
| Postia placenta                 | Basidiomycota | Agaricomycotina | Agaricomycetes | Incertae sedis   | Polyporales     | Fomitopsidaceae   | MAD 698 Gp0017841     | ABWF01         | 19789  | saprotroph (brown rot)                                 | 90,9      | 7,20   | 10568     | 1243      | 17173   | 54 Sanger                  |
| Ganoderma lucidum               | Basidiomycota | Agaricomycotina | Agaricomycetes | Incertae sedis   | Polyporales     | Ganodermataceae   | BCRC 3718 Gp0038562   | AGAX00000000.1 | 61379  | traditional use                                        | 43,29     |        | 194       |           |         | 56,1 454; illumina; Sanger |
| Ganoderma sp. 10597 SS1         | Basidiomycota | Agaricomycotina | Agaricomycetes | Incertae sedis   | Polyporales     | Ganodermataceae   | 10597 SS1 Gp0010017   | JGI            | 68313  | saprotroph                                             | 39,52     | 33,74  | 503       | 156       | 12910   | Sanger; 454; illumina      |
| Trametopsis cervina             | Basidiomycota | Agaricomycotina | Agaricomycetes | Incertae sedis   | Polyporales     | Hapalopilaceae    | CIRM-BRFM 1824 v1.0   | 1051569        |        | bioccontrol (mycoparasite)                             | 29,82     | 89     | 310       | 110       | 11836   | illumina                   |
| Hydnopolyporus fibriliatus      | Basidiomycota | Agaricomycotina | Agaricomycetes | Incertae sedis   | Polyporales     | Meripilaceae      | CBS384.51 Gp0111656   | 1051179        | 334190 | saprotroph                                             | 34,57     | 92,20  | 894       | 256       | 12424   | illumina                   |
| Bjerkandera adusta              | Basidiomycota | Agaricomycotina | Agaricomycetes | Incertae sedis   | Polyporales     | Meruliaceae       | HHB-1282E Gp0008855   | JGI            | 74757  | saprotrophic (white rot)                               | 42,73     | 47,59  | 1263      | 508       | 15473   | 454; illumina              |
| Ceriporiopsis (Gelatoporia) sul | Basidiomycota | Agaricomycotina | Agaricomycetes | Incertae sedis   | Polyporales     | Meruliaceae       | B Gp0003878           | JGI            | 60419  | saprotrophic (white rot)                               | 39        | 56,6   | 740       | 740       | 12125   | 454; Sanger                |
| Obba rivulosa                   | Basidiomycota | Agaricomycotina | Agaricomycetes | Incertae sedis   | Polyporales     | Meruliaceae       | 3A-2 Gp0046819        |                | 247915 | saprotrophic (white rot)                               | 34,04     | 127    | 808       | 712       | 13206   | illumina                   |
| Phlebia brevispora              | Basidiomycota | Agaricomycotina | Agaricomycetes | Incertae sedis   | Polyporales     | Meruliaceae       | HHB-7030 Gp0010049    | JGI            | 64423  | saprotrophic (white rot)                               | 49,96     | 42,56  | 3178      | 1645      | 16170   | 454; illumina              |
| Phanerochaete carnosae          | Basidiomycota | Agaricomycotina | Agaricomycetes | Incertae sedis   | Polyporales     | Phanerochaetaceae | HHB-10118 Gp0003186   | AEHB01         | 38425  | saprotrophic (white rot)                               | 46,29     | 58,10  | 2272      | 1137      | 13937   | 53,1 Sanger; 454; illumina |
| Phanerochaete chrysosporium     | Basidiomycota | Agaricomycotina | Agaricomycetes | Incertae sedis   | Polyporales     | Phanerochaetaceae | RP-78 Gp0000577       | AADS01         | 135    | saprotrophic (white rot)                               | 35,15     | 10,60  | 1253      | 232       | 13602   | 57 Sanger                  |
| Phlebiopsis gigantea            | Basidiomycota | Agaricomycotina | Agaricomycetes | Incertae sedis   | Polyporales     | Phanerochaetaceae | 11061_1 CF; Gp0017782 | JGI            | 207860 | saprotrophic (white rot)                               | 30,14     | 144,9  | 1195      | 573       | 11891   | illumina                   |
| Cerrena unicolor                | Basidiomycota | Agaricomycotina | Agaricomycetes | Incertae sedis   | Polyporales     | Polyporaceae      | 303 Gp0016934         | JGI            | 207864 | saprotrophic (white rot)                               | 36        | 189,6  | 1462      | 547       | 12966   | illumina                   |
| Dichomitus squalens             | Basidiomycota | Agaricomycotina | Agaricomycetes | Incertae sedis   | Polyporales     | Polyporaceae      | LYAD-421 S Gp0008772  | AEID01         | 53511  | saprotroph                                             | 42,75     | 50,63  | 2852      | 542       | 12290   | 55,6 454; illumina         |
| Fibroporia radiculosa           | Basidiomycota | Agaricomycotina | Agaricomycetes | Incertae sedis   | Polyporales     | Polyporaceae      | TFH 294 Gp0018298     | CAGC01         | 72357  | saprotroph (brown rot)                                 | 28,378    |        | 1823      | 861       | 9262    | 51,2 illumina GAll         |
| Leiotrametes sp. BRFM 1775      | Basidiomycota | Agaricomycotina | Agaricomycetes | Incertae sedis   | Polyporales     | Polyporaceae      | BRFM 1775 Gp0092279   | 1037392        | 252879 | lignocellulolytic                                      | 34,52     | 142,4  | 588       | 549       | 13763   | illumina                   |
| Lentinus polychrous             | Basidiomycota | Agaricomycotina | Agaricomycetes | Incertae sedis   | Polyporales     | Polyporaceae      | BCC7694 Gp0107385     | JSYW01         | 261275 | saprotroph; edible                                     | 38,05     | 180,00 | 10349     |           |         | 51                         |
| Lentinus tigrinus               | Basidiomycota | Agaricomycotina | Agaricomycetes | Incertae sedis   | Polyporales     | Polyporaceae      | ALCF2551-7 Gp0036550  | 1006930        | 200609 | saprotroph                                             | 39,76     | 103,6  | 572       | 263       | 15653   | illumina HiSeq             |
| Lignosus rhinocerotis           | Basidiomycota | Agaricomycotina | Agaricomycetes | Incertae sedis   | Polyporales     | Polyporaceae      | TM02 Gp0106247        | AXZM01         | 212725 | pharmaceutical importance (traditional medicine)       | 34,31     | 100    | 2317      | 1338      |         | 53,7 illumina HiSeq        |
| Polyporus arcularius            | Basidiomycota | Agaricomycotina | Agaricomycetes | Incertae sedis   | Polyporales     | Polyporaceae      | HHB13444 Gp0025526    | JGI            | 196048 | saprotrophic (white rot)                               | 43,45     | 118,00 | 2601      | 2540      | 17525   | illumina HiSeq             |
| Polyporus brumalis              | Basidiomycota | Agaricomycotina | Agaricomycetes | Incertae sedis   | Polyporales     | Polyporaceae      | BRFM 1820 v1.0        | 1051563        |        | saprotroph                                             | 45,72     | 94,9   | 1040      | 621       | 18244   | illumina                   |
| Pycnoporus cinnabarinus         | Basidiomycota | Agaricomycotina | Agaricomycetes | Incertae sedis   | Polyporales     | Polyporaceae      | BRFM 137              | CCBP01         | 251621 | saprotrophic (white rot)                               | 33,67     |        | 2036      | 784       | 10442   | 55,6                       |
| Pycnoporus coccineus            | Basidiomycota | Agaricomycotina | Agaricomycetes | Incertae sedis   | Polyporales     | Polyporaceae      | CIRM1662 Gp0025336    | JGI            | 254894 | saprotrophic (white rot)                               | 32,1      | 128,70 | 643       | 599       | 12798   | illumina HiSeq             |
| Pycnoporus sanguineus           | Basidiomycota | Agaricomycotina | Agaricomycetes | Incertae sedis   | Polyporales     | Polyporaceae      | BRFM 1264             | JGI            |        | saprotrophic (white rot)                               | 36,04     |        | 2046      | 657       | 14165   | 454                        |
| Trametes cingulata              | Basidiomycota | Agaricomycotina | Agaricomycetes | Incertae sedis   | Polyporales     | Polyporaceae      | BRFM 1805 v1.0        | 1051575        |        | saprotrophic (white rot)                               | 35        | 108,30 | 625       | 367       | 14110   | illumina                   |
| Trametes elegans                | Basidiomycota | Agaricomycotina | Agaricomycetes | Incertae sedis   | Polyporales     | Polyporaceae      | CIRM1663 Gp0035623    | JGI            | 239086 | saprotrophic (white rot)                               | 33,08     | 86,1   | 638       | 243       | 12851   | illumina                   |
| Trametes ljubarskyi             | Basidiomycota | Agaricomycotina | Agaricomycetes | Incertae sedis   | Polyporales     | Polyporaceae      | CIRM1659 Gp0035668    | JGI            | 239085 | saprotrophic (white rot)                               | 34        | 86,3   | 761       | 311       | 13180   | illumina HiSeq             |
| Trametes versicolor             | Basidiomycota | Agaricomycotina | Agaricomycetes | Incertae sedis   | Polyporales     | Polyporaceae      | FP-101664 Gp0007183   | AEJ101         | 46097  | saprotrophic (white rot)                               | 44,794    | 40     | 977       | 283       | 14572   | 57,7                       |
| Trichaptum abietinum            | Basidiomycota | Agaricomycotina | Agaricomycetes | Incertae sedis   | Polyporales     | Polyporaceae      | L-15831 ss Gp0025314  | JGI            | 210203 | saprotrophic (white rot)                               | 40,61     | 125,6  | 1345      | 587       | 14978   | illumina HiSeq             |
| Wolfiporia cocos                | Basidiomycota | Agaricomycotina | Agaricomycetes | Incertae sedis   | Polyporales     | Polyporaceae      | MD-104 SS; Gp0001013  | AEHD01         | 52943  | saprotroph (brown rot); traditional use                | 50,48     | 40,48  | 2228      | 348       | 12746   | 52 Sanger; 454; illumina   |
| Xenasmataella vaga              | Basidiomycota | Agaricomycotina | Agaricomycetes | Incertae sedis   | Polyporales     | Xenasmataceae     | CBS212.54 Gp0112339   | 1051167        | 333496 | saprotroph                                             | 64,17     | 91,3   | 3416      | 1275      | 20933   | illumina                   |
| Artemycetes pyxidatus           | Basidiomycota | Agaricomycotina | Agaricomycetes | Incertae sedis   | Russulales      | Auriscalpiaceae   | HHB10654 Gp0072265    | JGI            | 239090 | saprotroph                                             | 37,99     | 90,3   | 1188      | 477       | 15130   | illumina HiSeq             |
| Auriscalpium vulgare            | Basidiomycota | Agaricomycotina | Agaricomycetes | Incertae sedis   | Russulales      | Auriscalpiaceae   | FP105234-S Gp0072261  | 1031308        | 247917 | saprotroph                                             | 39,65     | 122,7  | 2195      | 1349      | 16945   | illumina HiSeq             |
| Lentinellus vulpinus            | Basidiomycota | Agaricomycotina | Agaricomycetes | Incertae sedis   | Russulales      | Auriscalpiaceae   | AHS73672-sp v1.0      | 1058270        |        | saprotroph (white rot)                                 | 34,71     | 94,9   | 1554      | 578       | 13477   |                            |
| Heterobasidium annosum          | Basidiomycota | Agaricomycotina | Agaricomycetes | Incertae sedis   | Russulales      | Bondarzewiaceae   | 03012 Gp0093680       | AOSL01         | 182499 | plant pathogen (conifers)                              | 31,009    | 66,5   | 2415      |           |         | 51,5 illumina              |
| Heterobasidium irregulare       | Basidiomycota | Agaricomycotina | Agaricomycetes | Incertae sedis   | Russulales      | Bondarzewiaceae   | TC 32-1 Gp0002642     | AEJO1          | 46703  | plant pathogen (conifers and hardwoods)                | 33,649    | 8,5    | 18        | 15        | 13272   | 52,2 Sanger                |
| Dentipellis sp.                 | Basidiomycota | Agaricomycotina | Agaricomycetes | Incertae sedis   | Russulales      | Hericiaceae       | KUC8613 v1.0          | 1036192        |        | bioremediation; white rot                              | 36,71     | 88,6   | 1184      | 425       | 14320   | illumina                   |
| Scytinostroma sp.               | Basidiomycota | Agaricomycotina | Agaricomycetes | Incertae sedis   | Russulales      | Lachnocladiaceae  | KUC9335 Gp0112034     | 1036200        | 333305 | uncertain                                              | 60,64     | N/A    | 597       | 597       | 14908   | PacBio                     |
| Vararia minispora               | Basidiomycota | Agaricomycotina | Agaricomycetes | Incertae sedis   | Russulales      | Lachnocladiaceae  | EC-137 Gp0033094      | 1006141        | 196070 | saprotroph                                             | 36,81     | 149,80 | 1675      | 1435      | 10962   | illumina HiSeq             |
| Peniophora aff. cinerea.        | Basidiomycota | Agaricomycotina | Agaricomycetes | Incertae sedis   | Russulales      | Peniophoraceae    | CBS 579.87 Gp0034226  | JGI            | 196016 | saprotroph                                             | 46,03     | 141,30 | 1236      | 1092      | 18952   | illumina HiSeq             |
| Peniophora sp.                  | Basidiomycota | Agaricomycotina | Agaricomycetes | Incertae sedis   | Russulales      | Peniophoraceae    | CONTA v1.0            | 1027012        |        | uncertain                                              | 48,44     | 85,80  | 487       | 217       | 18999</ |                            |

|                                                  |                  |                      |                      |                        |                   |                       |            |             |                 |        |                                                      |        |        |       |       |       |                       |                               |
|--------------------------------------------------|------------------|----------------------|----------------------|------------------------|-------------------|-----------------------|------------|-------------|-----------------|--------|------------------------------------------------------|--------|--------|-------|-------|-------|-----------------------|-------------------------------|
| Cryptococcus depauperatus                        | Basidiomycota    | Agaricomycotina      | Tremellomycetes      | Tremellomycetidae      | Tremellales       | Cryptococcaceae       | CBS 7841   | Gp0041267   | AWGK01          | 200572 | parasite (mycoparasite on Lecanicillium lecanii)     | 15,8   | 130    | 157   | 68    | 6521  | 44,7                  | Illumina                      |
| Cryptococcus gattii                              | Basidiomycota    | Agaricomycotina      | Tremellomycetes      | Tremellomycetidae      | Tremellales       | Cryptococcaceae       | R265       | Gp0002609   | AAF01           | 13691  | human pathogen                                       | 17,5   | 6      | 701   | 28    | 6580  | 47,87                 | Sanger                        |
| Cryptococcus neoformans                          | Basidiomycota    | Agaricomycotina      | Tremellomycetes      | Tremellomycetidae      | Tremellales       | Cryptococcaceae       | JEC 21     | Gp0000508   | GCA_000091045.1 | 13856  | human pathogen                                       | 19,05  | 12,5   | 37    |       | 6617  | 49                    | Sanger                        |
| Kwoniella (Cryptococcus) best                    | Basidiomycota    | Agaricomycotina      | Tremellomycetes      | Tremellomycetidae      | Tremellales       | Cryptococcaceae       | CBS 10118  | Gp0037867   | ASCK01          | 191321 | saprotroph                                           | 24,36  | 63     | 42    | 12    |       | 47,3                  | Illumina                      |
| Kwoniella (Cryptococcus) deje                    | Basidiomycota    | Agaricomycotina      | Tremellomycetes      | Tremellomycetidae      | Tremellales       | Cryptococcaceae       | CBS 10117  | Gp0038102   | ASCI01          | 191322 | saprotroph                                           | 23,86  | 88     | 69    | 13    |       | 48,4                  | Illumina                      |
| Kwoniella heveanensis                            | Basidiomycota    | Agaricomycotina      | Tremellomycetes      | Tremellomycetidae      | Tremellales       | Cryptococcaceae       | BCC8398    | Gp0038042   | ASQB01          | 191335 | saprotroph                                           | 25,469 | 30     | 114   | 67    |       | 51,9                  | Illumina                      |
| Kwoniella mangrovensis                           | Basidiomycota    | Agaricomycotina      | Tremellomycetes      | Tremellomycetidae      | Tremellales       | Cryptococcaceae       | CBS 8507   | Gp0038044   | ASQE01          | 191223 | saprotroph (marine)                                  | 22,654 | 44     | 105   | 62    |       | 44,9                  | Illumina                      |
| Kwoniella pini (Cryptococcus) f                  | Basidiomycota    | Agaricomycotina      | Tremellomycetes      | Tremellomycetidae      | Tremellales       | Cryptococcaceae       | CBS 10737  | Gp0038280   | ASCL01          | 191226 | saprotroph                                           | 20,83  | 62     | 42    | 18    |       | 40,2                  | Illumina                      |
| Fellomyces penicillatus                          | Basidiomycota    | Agaricomycotina      | Tremellomycetes      | Tremellomycetidae      | Tremellales       | Cuniculitremaceae     | Phaff54-35 | v1.0        | 1051257         |        | uncertain                                            | 21,05  | 97,6   | 37    | 22    | 8340  |                       | Illumina                      |
| Kockovaella imperatae                            | Basidiomycota    | Agaricomycotina      | Tremellomycetes      | Tremellomycetidae      | Tremellales       | Cuniculitremaceae     | NRRL Y-179 | Go0115733   | 1075691         | 334695 | uncertain; yeast                                     | 17,47  | 428,26 | 38    | 38    | 7393  |                       | PacBio                        |
| Phaeotremella (Cryptococcus) fl                  | Basidiomycota    | Agaricomycotina      | Tremellomycetes      | Tremellomycetidae      | Tremellales       | Phaeotremellaceae     | JCM 9039   | Gp0144038   | BCHT01          | 313820 | saprotroph                                           | 20,79  | 289    | 164   | 58    |       | 50,2                  | HiSeq 2500                    |
| Papiliotrema (Cryptococcus) fl                   | Basidiomycota    | Agaricomycotina      | Tremellomycetes      | Tremellomycetidae      | Tremellales       | Rhynchogastremataceae | NRRL Y-503 | Gp0038499   | CAUG01          | 185775 | biocontrol (of fusarium head blight)                 | 22,79  |        | 1269  | 712   |       | 58,5                  |                               |
| Papiliotrema (Cryptococcus) lz                   | Basidiomycota    | Agaricomycotina      | Tremellomycetes      | Tremellomycetidae      | Tremellales       | Rhynchogastremataceae | RY1        | Gp0044996   | JDSR01          | 210827 | occasional human pathogen                            | 19,14  | 50     | 1154  | 1152  |       | 56,1                  | Illumina MiSeq                |
| Fibulobasidium inconspicuum                      | Basidiomycota    | Agaricomycotina      | Tremellomycetes      | Tremellomycetidae      | Tremellales       | Sirobasidiaceae       | Phaff89-39 | v1.0        | 1052658         |        | saprotroph, probable                                 | 20,29  | 91,6   | 169   | 31    | 8148  |                       | Illumina                      |
| Tremella fuciformis                              | Basidiomycota    | Agaricomycotina      | Tremellomycetes      | Tremellomycetidae      | Tremellales       | Tremellaceae          | Tr26       | Gp0120585   | LBGW01          | 281519 | biocontrol (mycoparasite)                            | 23,64  | 40     | 3502  |       |       | 57                    | Illumina HiSeq                |
| Tremella mesenterica                             | Basidiomycota    | Agaricomycotina      | Tremellomycetes      | Tremellomycetidae      | Tremellales       | Tremellaceae          | DSM 1558   | Gp0002624   | AFVY01          | 32829  | industrial importance; white rot                     | 28,6   | 7,4    | 484   | 45    | 8313  | 46,7                  | Sanger                        |
| Phaeotremella (Cryptococcus) Basidiomycota       | Agaricomycotina  | Tremellomycetes      | Tremellomycetes      | Tremellomycetidae      | Trichosporonales  | Phaeotremellaceae     | JCM 13614  | Gp0144002   | BCHU01          | 313821 | saprotroph                                           | 22,65  | 264    | 52    | 30    |       | 42,4                  | Illumina                      |
| Apiotrichum (Trichosporon) bi                    | Basidiomycota    | Agaricomycotina      | Tremellomycetes      | Tremellomycetidae      | Trichosporonales  | Trichosporonaceae     | JCM 1599   | Gp0143984   | BCJU01          | 313856 | saprotrophic (cabbage)                               | 23,65  | 209    | 135   | 16    |       | 56,5                  | HiSeq 2500                    |
| Apiotrichum (Trichosporon) di                    | Basidiomycota    | Agaricomycotina      | Tremellomycetes      | Tremellomycetidae      | Trichosporonales  | Trichosporonaceae     | JCM 9580   | Gp0149825   | BCFW01          | 313776 | human allergen                                       | 24,51  | 271    | 92    | 28    |       |                       | Illumina                      |
| Apiotrichum (Trichosporon) g:                    | Basidiomycota    | Agaricomycotina      | Tremellomycetes      | Tremellomycetidae      | Trichosporonales  | Trichosporonaceae     | JCM 9941   | Gp0144051   | BCJN01          | 313859 | saprotrophic (cabbage)                               | 24,61  | 253    | 173   | 29    |       |                       | HiSeq 2500                    |
| Apiotrichum (Trichosporon) gr                    | Basidiomycota    | Agaricomycotina      | Tremellomycetes      | Tremellomycetidae      | Trichosporonales  | Trichosporonaceae     | JCM 10018  | Gp0143992   | BCJO01          | 313860 | saprotrophic (soil)                                  | 24,11  | 231    | 62    | 17    |       |                       | HiSeq 2500                    |
| Apiotrichum (Trichosporon) la                    | Basidiomycota    | Agaricomycotina      | Tremellomycetes      | Tremellomycetidae      | Trichosporonales  | Trichosporonaceae     | JCM 2947   | Gp0150864   | BCKV01          | 313881 | soil or animal-associated                            | 30,62  | 178    | 182   | 26    |       | 59,6                  | Illumina                      |
| Apiotrichum (Trichosporon) m                     | Basidiomycota    | Agaricomycotina      | Tremellomycetes      | Tremellomycetidae      | Trichosporonales  | Trichosporonaceae     | JCM 9937   | Gp0143035   | BCFV01          | 313775 | opportunistic human pathogen                         | 24,87  | 258    | 149   | 61    |       |                       | HiSeq 2500                    |
| Apiotrichum (Trichosporon) vi                    | Basidiomycota    | Agaricomycotina      | Tremellomycetes      | Tremellomycetidae      | Trichosporonales  | Trichosporonaceae     | JCM 10691  | Gp0150863   | BCKJ01          | 313871 | alkane-assimilating                                  | 31,62  | 196    | 174   | 35    |       | 59,6                  | Illumina                      |
| Cryptococcus sp. JCM 24511                       | Basidiomycota    | Agaricomycotina      | Tremellomycetes      | Tremellomycetidae      | Trichosporonales  | Trichosporonaceae     | JCM 24511  | Gp0143988   | BCLC01          | 313899 | industrial importance (oleaginous)                   | 28,18  | 103    | 232   | 55    |       | 58,5                  | HiSeq 2500                    |
| Cutaneotrichosporon (Cryptococcus) Basidiomycota | Agaricomycotina  | Tremellomycetes      | Tremellomycetes      | Tremellomycetidae      | Trichosporonales  | Trichosporonaceae     | JCM 1532   | Gp0144007   | BCJH01          | 313855 | industrial importance (oleaginous)                   | 18,64  | 305    | 182   | 75    |       | 57,9                  | HiSeq 2500                    |
| Trichosporon asahii                              | Basidiomycota    | Agaricomycotina      | Tremellomycetes      | Tremellomycetidae      | Trichosporonales  | Trichosporonaceae     | CBS 8904   | Gp0037591   | AMBO01          | 172216 | human pathogen                                       | 25,299 | 12,4   | 420   | 194   | 8528  | 59,5                  | 454; Illumina                 |
| Trichosporon chiarelli                           | Basidiomycota    | Agaricomycotina      | Tremellomycetes      | Tremellomycetidae      | Trichosporonales  | Trichosporonaceae     | MYA-4694   | v1.0        | 1042939         |        | insect-associated (ants)                             | 24,81  | 86,7   | 82    | 7     | 7766  |                       | Illumina                      |
| Trichosporon cutaneum                            | Basidiomycota    | Agaricomycotina      | Tremellomycetes      | Tremellomycetidae      | Trichosporonales  | Trichosporonaceae     | B3         | Gp0149983   | LRUG01          | 310294 | industrial importance (lipid production)             | 38,7   | 25     | 592   |       |       | 57,6                  | Illumina                      |
| Trichosporon guehoae                             | Basidiomycota    | Agaricomycotina      | Tremellomycetes      | Tremellomycetidae      | Trichosporonales  | Trichosporonaceae     | JCM 10690  | Gp0143997   | BCJX01          | 313868 | saprotrophic (soil)                                  | 33,7   | 187    | 851   | 35    |       | 59,2                  | HiSeq 2500                    |
| Trichosporon oleaginosus                         | Basidiomycota    | Agaricomycotina      | Tremellomycetes      | Tremellomycetidae      | Trichosporonales  | Trichosporonaceae     | IBC0246    | Gp0044565   | JGI             | 239490 | industrial importance (lipid producer); biotechnolog | 19,84  | 115,8  | 196   | 180   | 8322  |                       | Illumina HiSeq                |
| Trichosporon porosum                             | Basidiomycota    | Agaricomycotina      | Tremellomycetes      | Tremellomycetidae      | Trichosporonales  | Trichosporonaceae     | JCM 1458   | Gp0144004   | BGJ01           | 313854 | saprotrophic (soil)                                  | 25,99  | 196    | 154   | 37    |       | 59                    | HiSeq 2500                    |
| Vanrija humicola                                 | Basidiomycota    | Agaricomycotina      | Tremellomycetes      | Tremellomycetidae      | Trichosporonales  | Trichosporonaceae     | JCM 1457   | Gp0144003   | BCJF01          | 313853 | saprotroph                                           | 22,65  | 313    | 72    | 10    |       | 62,7                  | HiSeq 2500                    |
| Basidioascus undulatus                           | Basidiomycota    | Agaricomycotina      | Wallemiomycetes      | Uncertae sedis         | Geminibasidiales  | Geminibasidiaceae     | DAOM 2411  | Gp0094789   | JTJS01          | 247992 | xerotolerant                                         | 32,18  | 28     | 2993  | 2992  |       | 58                    |                               |
| Wallemia ichthyophaga                            | Basidiomycota    | Agaricomycotina      | Wallemiomycetes      | Uncertae sedis         | Wallemiales       | Wallemiaceae          | EXF-994    | Gp0041105   | APLC01          | 193177 | halophile                                            | 9,66   | 280    | 95    | 82    | 4863  | 45,3                  | Illumina HiSeq                |
| Wallemia sebi                                    | Basidiomycota    | Agaricomycotina      | Wallemiomycetes      | Uncertae sedis         | Wallemiales       | Wallemiaceae          | CBS 633.66 | Gp0005604   | AFQX01          | 64975  | xerophile                                            | 9,82   | 71     | 114   | 56    | 5284  | 40                    | 454; Illumina                 |
| Agaricostilbum hyphaenes                         | Basidiomycota    | Pucciniomycotina     | Agaricostilbomycetes | Agaricostilbomycetidae | Agaricostilbales  | Agaricostilbaceae     | ATCC MYA   | Gp0036613   | JGI             | 245617 | uncertain (associated with palms)                    | 17,89  | 197,7  | 121   | 108   | 7746  |                       | Illumina HiSeq                |
| Chionosphaera apobasidialis                      | Basidiomycota    | Pucciniomycotina     | Agaricostilbomycetes | Agaricostilbomycetidae | Agaricostilbales  | Chionosphaeraceae     | 52639      | v1.0        | 1045315         |        | parasite (lichens)                                   | 21,83  | 94,30  | 1183  | 398   | 9875  |                       | Illumina                      |
| Chionosphaera cuniculicola                       | Basidiomycota    | Pucciniomycotina     | Agaricostilbomycetes | Agaricostilbomycetidae | Agaricostilbales  | Chionosphaeraceae     | CBS10063   | v1.0        | 1051203         |        | insect-associated (conifer-inhabiting bark beetles)  | 14,16  | 89,4   | 43    | 19    | 7187  |                       | Illumina                      |
| Cystobasidiopsis (Sporobolom) Basidiomycota      | Pucciniomycotina | Agaricostilbomycetes | Agaricostilbomycetes | Agaricostilbomycetidae | Agaricostilbales  | Chionosphaeraceae     | JCM 7595   | Gp0149823   | BCIO01          | 313839 | uncertain                                            | 22,18  | 241,00 | 53    | 19    |       | 56,2                  | Illumina                      |
| Attractiellales sp. 95                           | Basidiomycota    | Pucciniomycotina     | Attractiellomycetes  | Uncertae sedis         | Attractiellales   | unknown               | PMI 95     | Gp0019383   | JGI             | 234661 | endophyte (root)                                     | 51,47  | 66,7   | 3076  | 1998  | 17606 |                       | Illumina HiSeq                |
| Classiicula fluitans                             | Basidiomycota    | Pucciniomycotina     | Classiiculaeae       | Uncertae sedis         | Classiiculaeae    | Classiiculaeae        | ATCC 6471: | Gp0036615   | JGI             | 218039 | aquatic                                              | 52,67  | 82,7   | 4363  | 1417  | 13270 |                       | Illumina HiSeq                |
| Cystobasidium pallidum                           | Basidiomycota    | Pucciniomycotina     | Cystobasidiomycetes  | Uncertae sedis         | Cystobasidiales   | Cystobasidiaceae      | JCM 3780   | Gp0144029   | BCLD01          | 313836 | uncertain                                            | 21,72  | 259    | 257   | 69    |       | 49,7                  | HiSeq 2500                    |
| Erythrobasidium hasegawianu                      | Basidiomycota    | Pucciniomycotina     | Cystobasidiomycetes  | Uncertae sedis         | Erythrobasidiales | Erythrobasidiaceae    | ATCC 9536  | Gp0036641   | 1019585         | 218035 | uncertain                                            | 40,69  | 155,3  | 265   | 158   | 9521  |                       | Illumina HiSeq                |
| Erythrobasidium yunnanense                       | Basidiomycota    | Pucciniomycotina     | Cystobasidiomycetes  | Uncertae sedis         | Erythrobasidiales | Erythrobasidiaceae    | JCM 10687  | Gp0143996   | BCJC01          | 313851 | uncertain                                            | 20,93  | 252    | 35    | 11    |       | 51                    | HiSeq 2500                    |
| Naohidea sebacea                                 | Basidiomycota    | Pucciniomycotina     | Cystobasidiomycetes  | Uncertae sedis         | Naohideales       | Naohideaceae          | CBS 8477   | (Fp0036591) | 1019588         | 218030 | biocontrol (mycoparasite)                            | 20,43  | 87,4   | 294   | 124   | 10410 |                       | Illumina HiSeq                |
| Heterogastrium pycnidioide                       | Basidiomycota    | Pucciniomycotina     | Microbotryomycetes   | Uncertae sedis         | Heterogastriales  | Heterogastriaceae     | ATCC MYA   | Gp0036643   |                 | 218038 | parasite                                             | 17,58  | 109,00 | 296   | 117   | 7658  |                       | Illumina; PacBio; 454; Sanger |
| Hyalopycnis blepharistoma                        | Basidiomycota    | Pucciniomycotina     | Microbotryomycetes   | Uncertae sedis         | Heterogastriales  | Heterogastriaceae     | ATCC 48560 | v1.0        | 1045309         |        | saprotroph, probable                                 | 17,93  | 102,2  | 448   | 210   | 7872  |                       | Illumina                      |
| Meredithblackwellia eburnea                      | Basidiomycota    | Pucciniomycotina     | Kriegeriaceae        | Uncertae sedis         | Kriegeriales      | Kriegeriaceae         | MCA 4105   | Gp0036543   | 1019597         | 223132 | uncertain; yeast (budding)                           | 30,68  | 112,00 | 201   | 52    | 11135 |                       |                               |
| Leucosporidiella creatinivora                    | Basidiomycota    | Pucciniomycotina     | Leucosporidiales     | Uncertae sedis         | Leucosporidiales  | Leucosporidiaceae     | JCM 10699  | Gp0150858   | BCKL01          | 313873 | aquatic saprotroph                                   | 27,97  | 190,00 | 296   | 122   |       | 58,7                  | Illumina                      |
| Microbotryum lynchidis-dioice                    | Basidiomycota    | Pucciniomycotina     | Microbotryales       | Uncertae sedis         | Microbotryales    | Microbotryaceae       | p1A1 Lamo  | Gp0142947   | CDLV01          | 285970 | plant pathogen (anther smut of campion flowers)      | 3,47   | 3,00   | 1     |       |       | 55,5                  |                               |
| Microbotryum violaceum                           | Basidiomycota    | Pucciniomycotina     | Microbotryomycetes   | Uncertae sedis         | Microbotryales    | Microbotryaceae       | p1A1 Lamo  | Gp0005981   | AEI01           | 41281  | plant pathogen (anther smut of Caryophyllaceae); s   | 26,138 | 15     | 2104  | 1231  | 7500  | 55,4                  | 454                           |
| Rhodospiridium toruloides                        | Basidiomycota    | Pucciniomycotina     | Microbotryomycetes   | Uncertae sedis         | Sporidiobolales   | Sporidiobolaceae      | MTCC 457   | Gp0038702   | AJMJ01          | 112573 | industrial importance (lipid producer)               | 20,06  | 121,35 | 689   | 462   | 8171  | 62                    | Illumina GAlIx                |
| Rhodotorula glutinis                             | Basidiomycota    | Pucciniomycotina     | Microbotryomycetes   | Uncertae sedis         | Sporidiobolales   | Sporidiobolaceae      | ATCC 2040: | Gp0009345   | AERV02          | 40971  | industrial importance (lipid producer)               | 20,478 | 40     | 5971  | 3361  | 61,9  | Sanger; 454; Illumina |                               |
| Rhodotorula graminis                             | Basidiomycota    | Pucciniomycotina     | Microbotryomycetes   | Uncertae sedis         | Sporidiobolales   | Sporidiobolaceae      | WP1        | Gp0003185   | JGI             | 32711  | endophyte                                            | 21,01  | 8,55   | 620   | 26    | 7283  | 454; Sanger           |                               |
| Rhodotorula minuta                               | Basidiomycota    | Pucciniomycotina     | Microbotryomycetes   | Uncertae sedis         | Sporidiobolales   | Sporidiobolaceae      | MCA 4210   | Gp0036376   | JGI             | 218034 | occasional human pathogen                            | 20,82  | 94,7   | 57    | 38    | 7814  |                       | Illumina HiSeq                |
| Rhodotorula mucilaginos                          | Basidiomycota    | Pucciniomycotina     | Microbotryomycetes   | Uncertae sedis         | Sporidiobolales   | Sporidiobolaceae      | C2.511     | Gp0118226   | JWTJ01          | 270792 | human pathogen (fungemia)                            | 19,98  | 70     | 1382  | 1034  |       | 60,5                  |                               |
| Rhodotorula sp. JG-1b                            | Basidiomycota    | Pucciniomycotina     | Microbotryomycetes   | Uncertae sedis         | Sporidiobolales   | Sporidiobolaceae      | JG-1b      | Gp0033786   | LQXB01          | 195770 | Opportunistic Pathogen                               | 19,4   | 133,90 | 171   | 156   | 6790  | 60,6                  | Illumina HiSeq                |
| Rhodotorula toruloides                           | Basidiomycota    | Pucciniomycotina     | Microbotryomycetes   | Uncertae sedis         | Sporidiobolales   | Sporidiobolaceae      | JCM 10020  | Gp0143993   | BCIY01          | 313847 | industrial importance (oleaginous)                   | 20,49  | 143    | 127   | 88    | 8140  | 62                    | HiSeq 2500                    |
| Sporidiobolus salmonicolor                       | Basidiomycota    | Pucciniomycotina     | Microbotryomycetes   | Uncertae sedis         | Sporidiobolales   | Sporidiobolaceae      | SPOSA6832  | Gp0143875   | CENE01          | 279947 | opportunistic human pathogen                         | 50,52  |        | 744   | 395   | 4672  | 61,3                  | Illumina HiSeq                |
| Sporobolomyces linderae                          | Basidiomycota    | Pucciniomycotina     | Microbotryomycetes   | Uncertae sedis         | Sporidiobolales   | Sporidiobolaceae      | CBS 7893   | (Fp0036589) | JGI             | 218037 | uncertain; only known strain in existence            | 18,24  | 93,9   | 56    | 35    | 9062  |                       | Illumina HiSeq                |
| Sporobolomyces roseus                            | Basidiomycota    | Pucciniomycotina     | Microbotryomycetes   | Uncertae sedis         | Sporidiobolales   | Sporidiobolaceae      | IAM 13481  | Gp0017897   | JGI             | 207682 | free-living; non-pathogenic                          | 21,2   | 8,1    |       | 76    | 5536  |                       | Illumina                      |
| Mixia osmundae                                   | Basidiomycota    | Pucciniomycotina     | Mixiomycetes         | Uncertae sedis         | Mixiales          | Mixiaceae             | IAM 14324  | Gp0010143   | JGI             | 205560 | plant pathogen (fern parasite)                       | 13,63  | 150,9  | 204   | 156   | 6903  | 55,5                  | 454; Illumina                 |
| Cronartium comandrae                             | Basidiomycota    | Pucciniomycotina     | Pucciniales          | Uncertae sedis         | Cronartiales      | Cronartiaceae         | C4         | Gp0038527   | AUZW01          | 190832 | plant pathogen; rust fungus (pine)                   | 68,6   | 549    | 54532 | 35717 |       | 40,7                  | Illumina HiSeq                |
| Cronartium quercuum                              | Basidiomycota    | Pucciniomycotina     | Pucciniales          | Uncertae sedis         | Cronartiales      | Cronartiaceae         | G11        | Gp0044798   | JGI             | 67371  | plant pathogen; rust fungus (fusiform rust of pine)  | 76,57  | 70,4   | 10431 | 1198  | 13903 |                       | Illumina                      |
| Cronartium ribicola                              | Basidiomycota    | Pucciniomycotina     | Pucciniales          |                        |                   |                       |            |             |                 |        |                                                      |        |        |       |       |       |                       |                               |

|                               |               |                    |                   |                     |               |                  |           |           |               |        |                                                        |         |        |      |      |      |               |                    |
|-------------------------------|---------------|--------------------|-------------------|---------------------|---------------|------------------|-----------|-----------|---------------|--------|--------------------------------------------------------|---------|--------|------|------|------|---------------|--------------------|
| Malassezia furfur             | Basidiomycota | Ustilaginomycotina | Malasseziomycetes | Uncertae sedis      | Malasseziales | Malasseziaceae   | CBS 1878  | Gp0133469 | LFGL01        | 286710 | skin-associated; lipophilic                            | 7,88    | 500    | 1777 | 1694 | 64,1 | llumina HiSeq |                    |
| Malassezia globosa            | Basidiomycota | Ustilaginomycotina | Malasseziomycetes | Uncertae sedis      | Malasseziales | Malasseziaceae   | CBS 7966  | Gp0003180 | AAAY01        | 18719  | human pathogen                                         | 8,958   | 7      | 67   | 1286 | 52   | Sanger        |                    |
| Malassezia japonica           | Basidiomycota | Ustilaginomycotina | Malasseziomycetes | Uncertae sedis      | Malasseziales | Malasseziaceae   | JCM 11963 | Gp0143982 | BCKY01        | 313884 | skin-associated; lipophilic                            | 8,36    | 466,00 | 27   | 16   | 62,3 | HiSeq 2500    |                    |
| Malassezia nana               | Basidiomycota | Ustilaginomycotina | Malasseziomycetes | Uncertae sedis      | Malasseziales | Malasseziaceae   | JCM 12085 | Gp0143983 | BCLA01        | 313886 | opportunistic animal pathogen                          | 7,58    | 489    | 29   | 13   | 58   | HiSeq 2500    |                    |
| Malassezia obtusa             | Basidiomycota | Ustilaginomycotina | Malasseziomycetes | Uncertae sedis      | Malasseziales | Malasseziaceae   | CBS 7876  | Gp0133473 | LFGC01        | 286710 | skin-associated; lipophilic                            | 7,84    | 455    | 1905 | 1709 | 62,2 | llumina HiSeq |                    |
| Malassezia pachydermatis      | Basidiomycota | Ustilaginomycotina | Malasseziomycetes | Uncertae sedis      | Malasseziales | Malasseziaceae   | CBS 1879  | Gp0143141 | LGAV01        | 288787 | animal pathogen (dermatitis)                           | 8,15    | 250    | 118  | 91   | 4202 | 55,1          | llumina HiSeq      |
| Malassezia restricta          | Basidiomycota | Ustilaginomycotina | Malasseziomycetes | Uncertae sedis      | Malasseziales | Malasseziaceae   | CBS 7877  | Gp0003181 | AAXK01        | 18721  | human pathogen                                         | 4,628   | 1      | 3812 |      | 55,3 | Sanger        |                    |
| Malassezia slooffiae          | Basidiomycota | Ustilaginomycotina | Malasseziomycetes | Uncertae sedis      | Malasseziales | Malasseziaceae   | CBS 7956  | Gp0132990 | LFGK01        | 286710 | opportunistic animal pathogen                          | 8,43    | 262    | 1897 | 1641 | 4202 | 65,9          | llumina HiSeq      |
| Malassezia sympodialis        | Basidiomycota | Ustilaginomycotina | Malasseziomycetes | Uncertae sedis      | Malasseziales | Malasseziaceae   | ATCC 4213 | Gp0039243 | CANK01        | 192188 | opportunistic human and animal pathogen (cutaneous)    | 7,67    | 130,00 | 87   | 65   | 3517 | 59,1          | 454; llumina HiSeq |
| Malassezia yamatoensis        | Basidiomycota | Ustilaginomycotina | Malasseziomycetes | Uncertae sedis      | Malasseziales | Malasseziaceae   | MY9725    | Gp0133476 | LFCX01        | 286710 | human pathogen (dermatitis)                            | 8,11    | 235,00 | 88   | 49   |      | 49,7          | llumina HiSeq      |
| Ustilaginomycotina sp. SA 807 | Basidiomycota | Ustilaginomycotina | unknown           | unknown             | unknown       | unknown          | SA 807    | Gp0042889 | 1019621       | 254893 | uncertain; plant-associated                            | 27,32   | 140,8  | 1563 | 1406 | 8060 | llumina HiSeq |                    |
| Melanotaenium endogenum       | Basidiomycota | Ustilaginomycotina | Ustilaginomycetes | Ustilaginomycetidae | Urocystidales | Melanotaeniaceae | CBS481.91 | v1.0      | 1051185       |        | plant pathogen (bedstraw); smut                        | 19,17   | 97,9   | 316  | 87   | 6624 | llumina       |                    |
| Kalmanozyma (Pseudozyma) t    | Basidiomycota | Ustilaginomycotina | Ustilaginomycetes | Ustilaginomycetidae | Ustilaginales | Ustilaginaceae   | GHG001    | Gp0070930 | AWX001        | 217085 | industrial importance                                  | 17,3254 | 585    | 132  | 45   | 5889 | 58,1          | llumina HiSeq      |
| Moesziomyces (Pseudozyma)     | Basidiomycota | Ustilaginomycotina | Ustilaginomycetes | Ustilaginomycetidae | Ustilaginales | Ustilaginaceae   | T-34      | Gp0038467 | BAFG01        | 186736 | industrial importance                                  | 18,07   | 20     | 744  | 27   | 6640 | 61,1          | 454                |
| Moesziomyces (Pseudozyma)     | Basidiomycota | Ustilaginomycotina | Ustilaginomycetes | Ustilaginomycetidae | Ustilaginales | Ustilaginaceae   | DSM70725  | Gp0070929 | AWN101        | 215967 | industrial importance                                  | 17,921  | 90     | 1968 |      | 6011 | 60,9          | llumina HiSeq      |
| Moesziomyces antarcticus      | Basidiomycota | Ustilaginomycotina | Ustilaginomycetes | Ustilaginomycetidae | Ustilaginales | Ustilaginaceae   | JCM 10317 | Gp0103432 | BBIZ01        | 257785 | industrial importance (psychrophilic lipid and lipase) | 18,11   | 200    | 276  | 197  | 6766 | 60,9          | llumina HiSeq      |
| Pseudozyma flocculosa         | Basidiomycota | Ustilaginomycotina | Ustilaginomycetes | Ustilaginomycetidae | Ustilaginales | Ustilaginaceae   | DAOM 196  | Gp0044988 | AOUS01        | 185206 | biocontrol (powdery mildew)                            | 23,305  | 28     | 1583 | 37   | 6877 | 65,3          | 454                |
| Pseudozyma hubeiensis         | Basidiomycota | Ustilaginomycotina | Ustilaginomycetes | Ustilaginomycetidae | Ustilaginales | Ustilaginaceae   | SY62      | Gp0040215 | BAOW01        | 203274 | industrial importance (biosurfactant producing)        | 18,44   | 200    | 159  | 74   | 7472 | 56,5          | llumina HiSeq      |
| Sporisorium reilianum         | Basidiomycota | Ustilaginomycotina | Ustilaginomycetes | Ustilaginomycetidae | Ustilaginales | Ustilaginaceae   | SRZ2      | Gp0038426 | GCA_000230245 | 64587  | plant pathogen (maize); smut                           | 18,39   |        | 818  | 23   | 6648 | 59,68         | 454                |
| Sporisorium scitamineum       | Basidiomycota | Ustilaginomycotina | Ustilaginomycetes | Ustilaginomycetidae | Ustilaginales | Ustilaginaceae   | 2014001   | Gp0118304 | JFOL01        | 240344 | plant pathogen (sugarcane); smut                       | 19,78   | 100    | 329  | 69   |      | 64,64         | HiSeq 2500         |
| Ustilago esculenta            | Basidiomycota | Ustilaginomycotina | Ustilaginomycetes | Ustilaginomycetidae | Ustilaginales | Ustilaginaceae   | MMT       | Gp0109108 | JTLW01        | 263330 | plant pathogen (wild rice); smut                       | 20,2    | 139    | 298  |      |      | 54,4          | llumina HiSeq      |
| Ustilago hordei               | Basidiomycota | Ustilaginomycotina | Ustilaginomycetes | Ustilaginomycetidae | Ustilaginales | Ustilaginaceae   | Uh4857-4  | Gp0038438 | CAGI01        | 79049  | plant pathogen (barley); smut                          | 21,15   |        | 713  |      | 7230 | 51,9          |                    |
| Ustilago maydis               | Basidiomycota | Ustilaginomycotina | Ustilaginomycetes | Ustilaginomycetidae | Ustilaginales | Ustilaginaceae   | 521       | Gp0000206 | AACP01        | 1446   | plant pathogen (maize and teosinte); smut              | 19,799  | 10     | 277  |      | 6631 | 54            | Sanger             |

## Sequenced early-diverging fungal species

| Classification                    |                    |                     |                       |                    |                   |                     | Genome statistics |                |                  |                 |                                                       |           |          |              |                |         |                       |                       |
|-----------------------------------|--------------------|---------------------|-----------------------|--------------------|-------------------|---------------------|-------------------|----------------|------------------|-----------------|-------------------------------------------------------|-----------|----------|--------------|----------------|---------|-----------------------|-----------------------|
| SPECIES                           | PHYLUM             | SUBPHYLUM           | CLASS                 | SUBCLASS           | ORDER             | FAMILY              | Strain            | GOLD Accession | GENOME Accession | NCBI Project ID | Significance                                          | Size (Mb) | coverage | # of contigs | # of scaffolds | # genes | GC                    | Technology            |
| Allomyces macrogynus              | Blastocladiomycota | none                | Blastocladiomycetes   | none               | Blastocladales    | Blastocladiaceae    | ATCC 38327        | Gp0002500      | ACDU00000000.1   | 20563           | model organism (sexual cycle); cosmopolitan           | 57        | 11,39    | 8973         | 101            |         |                       |                       |
| Catenaria anguillulae             | Blastocladiomycota | none                | Blastocladiomycetes   | none               | Blastocladales    | Catenariaceae       | PL171             | Gp0016932      | JGI              | 69551           | biocontrol (nematode parasite)                        | 41,34     | 93,4     | 2577         | 509            |         | 12804                 | Illumina; PacBio      |
| Globomyces pollinis-pini          | Chytridiomycota    | none                | Chytridiomycetes      | Chytridiomycetidae | Rhizophydiales    | Globomycetaceae     | Arg68             | G00136949      | 1098991          | 331560          | aquatic saprotroph                                    | 21,65     | 163,00   | 1402         | 1155           | 11537   |                       | Illumina              |
| Batrachochytrium dendrobatidis    | Chytridiomycota    | none                | Chytridiomycetes      | Chytridiomycetidae | Rhizophydiales    | unknown             | JEL423            | Gp0002494      | AATT01           | 13653           | animal pathogen                                       | 23,89     | 7,40     |              | 70             | 8700    | 39,3                  | Sanger                |
| Homolophyctis punctrhiza          | Chytridiomycota    | none                | Chytridiomycetes      | Chytridiomycetidae | Rhizophydiales    | unknown             | JEL 142           | Gp0039389      | AFSM01           | 68115           | saprotroph                                            | 26,11     | 11,00    | 14231        | 11986          |         | 49,7                  | 454                   |
| Spizellomyces punctatus           | Chytridiomycota    | none                | Chytridiomycetes      | Chytridiomycetidae | Spizellomycetales | Spizellomycetaceae  | DAOM BR117        | Gp0002502      | ACOEO1           | 77881           | model organism                                        | 23,906    | 9,38     | 329          |                |         | 48                    | Sanger                |
| Gonapodya prolifera               | Chytridiomycota    | none                | Monoblepharidomycetes | none               | Monoblepharidales | Gonapodyaceae       | JEL478            | Gp0017029      | JGI              | 207863          | aquatic                                               | 48,79     |          | 1154         | 352            | 13902   |                       | Illumina              |
| Rozella allomycis                 | Cryptomycota       | none                | none                  | none               | none              | unknown             | CSF55             | Gp0009558      | JGI              | 223002          | parasite (water moulds)                               | 11,86     | 264,00   | 1128         | 1059           | 6350    | 454;                  | Illumina HiSeq        |
| Antonospora locustae              | Microsporidia      | -                   | -                     | -                  | -                 | Nosematidae         | HM-2013           | Gp0038411      |                  | 185776          | biocontrol; parasite (grasshoppers)                   | 6,07      | 7,90     | 3116         | 3116           | 2606    |                       | Illumina              |
| Edhazardia aedis                  | Microsporidia      | -                   | -                     | -                  | -                 | Amblyosporidae      | USNM 41457        | Gp0038023      | AFBI02           | 65125           | parasite                                              | 46,6      | 20,00    | 2379         |                | 4281    | 22,5                  | 454                   |
| Spraguea lophii                   | Microsporidia      | -                   | -                     | -                  | -                 | Spraguidae          | 42_110            | Gp0039328      | ATCN01           | 73605           | parasite (teleost fish)                               | 4,98      | 70,00    | 1392         |                | 2596    | 23,4                  | Illumina GAI          |
| Enterocytozoon bienewisi          | Microsporidia      | -                   | -                     | -                  | -                 | Enterocytozoonidae  | H348              | Gp0002463      | ABGB01           | 21011           | parasite                                              | 3,86      |          | 1743         | 1733           | 3806    | 34                    |                       |
| Nosema antheraeae                 | Microsporidia      | -                   | -                     | -                  | -                 | Nosematidae         | YY                | Gp0038948      |                  | 183977          | parasite (silkworm)                                   | 6,6       |          |              | 6215           | 3413    | 28                    | Sanger; Illumina      |
| Nosema apis                       | Microsporidia      | -                   | -                     | -                  | -                 | Nosematidae         | BRL01             | Gp0037550      | ANPH01           | 66735           | parasite (honeybee)                                   | 8,569     | 27       | 1133         | 554            | 2764    | 18,8                  | 454                   |
| Nosema bombycis                   | Microsporidia      | -                   | -                     | -                  | -                 | Nosematidae         | CQ1               | Gp0005763      | ACJZ01           | 30919           | parasite (silkworm)                                   | 15,7      |          | 3558         | 1605           | 4458    | 31                    | Sanger; Illumina      |
| Nosema ceranae                    | Microsporidia      | -                   | -                     | -                  | -                 | Nosematidae         | BRL01             | Gp0004758      | ACOL01           | 32971           | parasite (honeybee)                                   | 7,86      | 24,20    | 5465         | 2614           | 25,3    |                       | 454                   |
| Vittaforma corneae                | Microsporidia      | -                   | -                     | -                  | -                 | Nosematidae         | ATCC 50505        | Gp0038026      | AEYK01           | 63501           | opportunistic pathogen                                | 3,213     | 68       | 314          | 220            | 2293    | 36,5                  | 454                   |
| Encephalitozoon bienewisi         | Microsporidia      | -                   | -                     | -                  | -                 | Encephalitozoonidae | H348              | ABGB01         |                  | 28163           | parasite                                              | 3,86      | 64       | 1743         | 1733           | 3632    | 33,7                  | 454; Illumina         |
| Encephalitozoon cuniculi          | Microsporidia      | -                   | -                     | -                  | -                 | Encephalitozoonidae | GB-M1             | Gp0000710      | GCA_000091225.1  | 13833           | parasite                                              | 2,5       |          | 12           | 11             | 1997    | 48                    | 454                   |
| Encephalitozoon hellem            | Microsporidia      | -                   | -                     | -                  | -                 | Encephalitozoonidae | ATCC 50504        | Gp0039296      | GCA_000277815.3  | 73047           | parasite                                              | 2,25      | 53,00    | 12           | 12             | 1847    |                       |                       |
| Encephalitozoon intestinalis      | Microsporidia      | -                   | -                     | -                  | -                 | Encephalitozoonidae | ATCC 50506        | Gp0006942      | GCA_000146465.1  | 42703           | parasite                                              | 2,22      | 40       | 12           | 11             | 1833    | 42                    | Sanger                |
| Encephalitozoon romaleae          | Microsporidia      | -                   | -                     | -                  | -                 | Encephalitozoonidae | SJ-2008           | Gp0039118      | GCA_000280035.2  | 160949          | parasite                                              | 2,19      | 300,00   | 13           | 13             | 1677    | 40,4                  |                       |
| Anncalia algerae                  | Microsporidia      | -                   | -                     | -                  | -                 | Tubulinosematidae   | PRA109            | Gp0038024      | AOMV02           | 188094          | parasite (aquatic)                                    | 17,5      | 341      | 8403         | 7113           |         |                       | Illumina              |
| Nematocida parisii                | Microsporidia      | -                   | -                     | -                  | -                 | Incertae sedis      | ERTm1             | Gp0008837      | JGI              | 51843           | parasite (C.elegans)                                  | 4,07      | 97,00    | 115          | 65             | 2661    | 34,4                  | 454                   |
| Pseudoloma neurophilia            | Microsporidia      | -                   | -                     | -                  | -                 | Glugeidae           |                   | Gp0048063      | LGUB01           | 206217          | parasite (zebrafish)                                  | 5,25      | 138,00   | 1603         |                | 3645    |                       | Illumina              |
| Trachipleistophora hominis        | Microsporidia      | -                   | -                     | -                  | -                 | Pleistophoridae     |                   | Gp0038589      | ANCC01           | 84343           | parasite                                              | 8,498     | 32,50    | 1632         | 310            | 3253    | 34,1                  | 454; SOLID            |
| Vavraia culicis                   | Microsporidia      | -                   | -                     | -                  | -                 | Pleistophoridae     | floridensis       | Gp0009650      | AEGU01           | 62117           | parasite (mosquito)                                   | 6,118     | 27       | 501          | 379            | 2825    | 39,7                  | 454                   |
| Hamiltosporidium tvaerminensis    | Microsporidia      | -                   | -                     | -                  | -                 | Dubosqiidae         | OER-3-3           | Gp0008119      | ACSZ01           | 39213           | parasite                                              | 13,27     |          | 41786        |                | 26,5    |                       |                       |
| Nematocida disploedere            | Microsporidia      | -                   | -                     | -                  | -                 | None                | JUm2807           | Gp0149837      | LTDL01           | 312555          | parasite (Caenorhabditis elegans)                     | 3,1       | 2500,00  | 99           | 42             | 2278    | 49,1                  | Illumina              |
| Nematocida ironsii                | Microsporidia      | -                   | -                     | -                  | -                 | None                | ERTm5             | Gp0149836      | LTDK01           | 312551          | parasite (Caenorhabditis elegans)                     | 4,4       | 101,00   | 223          | 186            | 2709    | 33,5                  | Illumina              |
| Nematocida sp. 1                  | Microsporidia      | -                   | -                     | -                  | -                 | None                | ERTm2             | Gp0038029      | AERB01           | 61785           | parasite (Caenorhabditis elegans)                     | 4,7       | 65,00    | 289          | 202            | 2493    | 38,4                  | 454                   |
| Ordospora colligata               | Microsporidia      | -                   | -                     | -                  | -                 | Ordosporidae        | OC4               | Gp0101994      | JOKQ01           | 210314          | parasite (Daphnia)                                    | 2,29      | 627,00   | 15           |                | 1820    | 38,5                  | Illumina HiSeq        |
| Mitosporidium daphniae            | Microsporidia      | -                   | -                     | -                  | -                 | unknown             | UGP3              | Gp0107713      | JMKJ01           | 243305          | parasite                                              | 5,64      | 300      | 612          |                | 3330    | 43                    | Illumina HiSeq        |
| Rhizoglyphus irregularis          | Mucoromycota       | Glomeromycotina     | Glomeromycetes        | none               | Glomerales        | Glomeraceae         | DAOM 197198       | Gp0002623      | AUPC01           | 208392          | mycorrhizal (arbuscular)                              | 91,08     | 100      | 28405        | 28371          | 30282   | 27,5                  | Sanger; 454; Illumina |
| Lobosporangium transversale       | Mucoromycota       | Mortierellomycotina | none                  | none               | Mortierellales    | Mortierellaceae     | NRRL 3116 v1.0    |                | 1076126          |                 | industrial importance (lipid biosynthesis)            | 42,77     | 195,5    | 138          | 138            | 11822   |                       | PacBio                |
| Mortierella alpina                | Mucoromycota       | Mortierellomycotina | none                  | none               | Mortierellales    | Mortierellaceae     | ATCC 32222        | Gp0005982      | ADAG01           | 41211           | industrial importance                                 | 38,042    | 31,70    | 1099         |                | 52      | 454; Illumina; Sanger |                       |
| Mortierella elongata              | Mucoromycota       | Mortierellomycotina | none                  | none               | Mortierellales    | Mortierellaceae     | AG-77             | Gp0019300      | JGI              | 196039          | endophyte; saprotroph                                 | 49,96     | 112,80   | 3314         | 473            | 14964   |                       | Illumina HiSeq        |
| Mortierella multidivariata        | Mucoromycota       | Mortierellomycotina | none                  | none               | Mortierellales    | Mortierellaceae     | RSA 2152 T        | G00145900      | 1098953          | 331667          | saprotroph; soil; garlic-odour                        | 37,67     | 184,76   | 217          | 217            | 12248   |                       | PacBio                |
| Mortierella verticillata          | Mucoromycota       | Mortierellomycotina | none                  | none               | Mortierellales    | Mortierellaceae     | NRRL 6337         | Gp0002501      | AEVJ01           | 20603           | animal pathogen                                       | 41,912    | 225      | 701          | 56             | 12774   | 48,9                  | Illumina; Sanger      |
| Backusella circaea                | Mucoromycota       | Mucoromycotina      | none                  | none               | Mucorales         | Backusellaceae      | FSU 941           | Gp0032377      | JGI              | 196083          | thermophile                                           | 48,65     | 100,50   | 2354         | 1095           | 17039   |                       | Illumina HiSeq        |
| Blakeslea trispora                | Mucoromycota       | Mucoromycotina      | none                  | none               | Mucorales         | Choanephoraceae     | NRRL 2456 v1.0    |                | 1085219          |                 | industrial importance (beta-carotene); plant pathogen | 37,51     | 80       | 328          | 328            | 11687   |                       | PacBio                |
| Absidia (Chlamydoabsidia) padenii | Mucoromycota       | Mucoromycotina      | none                  | none               | Mucorales         | Cunninghamellaceae  | NRRL 2977         | G00141635      | 1099015          | 331669          | uncertain                                             | 34,33     | 139,05   | 117          | 117            | 13495   |                       | PacBio                |
| Cunninghamella bertholletiae      | Mucoromycota       | Mucoromycotina      | none                  | none               | Mucorales         | Cunninghamellaceae  | B7461             | Gp0044997      | JNEL01           | 211905          | human pathogen (mucoromycosis)                        | 31,1      | 82,92    | 880          |                | 24,8    |                       | Illumina HiSeq        |
| Cunninghamella elegans            | Mucoromycota       | Mucoromycotina      | none                  | none               | Mucorales         | Cunninghamellaceae  | B9769             | Gp0038540      | JNDR01           | 184885          | degrades xenobiotics, some herbicides and fungicides  | 31,74     | 115,42   | 1380         |                | 24,5    |                       | Illumina HiSeq        |
| Gongronella butleri               | Mucoromycota       | Mucoromycotina      | none                  | none               | Mucorales         | Cunninghamellaceae  | CBS 227.36        | G00141634      | 1098955          | 331668          | industrial importance (chitosan production)           | 33,01     | 150,81   | 112          | 112            | 11004   |                       | PacBio                |
| Hesseltinella vesiculosa          | Mucoromycota       | Mucoromycotina      | none                  | none               | Mucorales         | Cunninghamellaceae  | NRRL 3301         | Gp0046759      | 1026982          | 243954          | uncertain                                             | 25,86     | 157,80   | 1202         | 252            | 10675   |                       | Illumina              |
| Lichtheimia corymbifera           | Mucoromycota       | Mucoromycotina      | none                  | none               | Mucorales         | Lichtheimiaceae     | CBS 429.75        | Gp0039842      | CBTN01           | 248798          | human pathogen (mucoromycosis)                        | 33,53     |          | 589          | 209            | 13404   | 43,9                  | HiSeq 2500; 454       |
| Lichtheimia hyalospora            | Mucoromycota       | Mucoromycotina      | none                  | none               | Mucorales         | Lichtheimiaceae     | FSU 10163         | Gp0033114      | JGI              | 196074          | industrial importance (thermotolerant)                | 33,28     | 140,1    | 2294         | 2222           | 12062   |                       | Illumina              |
| Lichtheimia ramosa                | Mucoromycota       | Mucoromycotina      | none                  | none               | Mucorales         | Lichtheimiaceae     | :FSU:6197         | Gp0119779      |                  | 257263          | opportunistic human pathogen (mucoromycosis)          | 30,71     |          | 85           | 74             | 11542   | 41,1                  | HiSeq 2500; 454       |
| Phascalomyces articholus          | Mucoromycota       | Mucoromycotina      | none                  | none               | Mucorales         | Lichtheimiaceae     | RSA 2281          | G00126192      | 1098949          | 331828          | coprophilous                                          | 47,61     | 121,30   | 150          | 150            | 14495   |                       | PacBio                |
| Rhizomucor miehei                 | Mucoromycota       | Mucoromycotina      | none                  | none               | Mucorales         | Lichtheimiaceae     | CAU432            | Gp0037929      | AGBC01           | 66605           | industrial importance (thermophile)                   | 27,442    | 16       | 3599         | 870            | 44,3    | 454; Illumina HiSeq   |                       |
| Rhizomucor variabilis             | Mucoromycota       | Mucoromycotina      | none                  | none               | Mucorales         | Lichtheimiaceae     | B7584             | Gp0044976      | JNES01           | 211914          | human pathogen                                        | 33,037    | 59,39    | 967          |                | 37,8    |                       | Illumina HiSeq        |
| Thermomucor indiciae-seudaticeae  | Mucoromycota       | Mucoromycotina      | none                  | none               | Mucorales         | Lichtheimiaceae     | HACC 243          | Gp0107552      | JSYX01           | 261109          | industrial importance (dairy industry)                | 29,57     | 180,00   | 1958         |                | 45,8    |                       | Illumina HiSeq        |
| Zychaea mexicana                  | Mucoromycota       | Mucoromycotina      | none                  | none               | Mucorales         | Lichtheimiaceae     | RSA 1403          | G00126193      | 1098951          | 331829          | coprophilous                                          | 50,64     | 260      | 357          | 357            | 14004   |                       | PacBio                |
| Actinomucor elegans               | Mucoromycota       | Mucoromycotina      | none                  | none               | Mucorales         | Mucoraceae          | JCM 22485         | Gp0144022      | BCHK01           | 313812          | human pathogen; mucormycosis                          | 34,17     | 317,00   | 494          | 192            | 35,9    |                       | HiSeq 2500            |
| Apophysomyces elegans             | Mucoromycota       | Mucoromycotina      | none                  | none               | Mucorales         | Mucoraceae          | B7760             | Gp0038478      | JNDQ01           | 184884          | human pathogen (mucoromycosis); thermotolerant        | 38,5      | 53,91    | 1528         |                | 35,4    |                       | Illumina HiSeq        |
| Apophysomyces trapeziformis       | Mucoromycota       | Mucoromycotina      | none                  | none               | Mucorales         | Mucoraceae          | B9324             | Gp0038504      | JNDP01           | 184883          | human pathogen (mucoromycosis)                        | 35,8      | 102,48   | 1400         |                | 37,8    |                       | Illumina HiSeq        |
| Cokeromyces recurvatus            | Mucoromycota       | Mucoromycotina      | none                  | none               | Mucorales         | Mucoraceae          | B5483             | Gp0044990      | JNEH01           | 211901          | human pathogen (mucoromycosis)                        | 29,34     | 63,16    | 2637         |                | 30,4    |                       |                       |
| Mucor (Kirkomyces) cordense       | Mucoromycota       | Mucoromycotina      | none                  | none               | Mucorales         | Mucoraceae          | RSA 1222          | G00141636      | 1099019          | 331670          | uncertain                                             | 40,95     | 157,38   | 150          | 150            | 16794   |                       | PacBio                |
| Mucor ambiguus                    | Mucoromycota       | Mucoromycotina      | none                  | none               | Mucorales         | Mucoraceae          | NBRC 6742         | Gp0122235      | BBKB01           | 275080          | industrial importance (novel carbonyl reductase)      | 40,74     | 200,00   | 8422         | 1283           | 11343   | 40,7                  | Illumina MiSeq        |
| Mucor circinelloides              | Mucoromycota       | Mucoromycotina      | none                  | none               | Mucorales         | Mucoraceae          | 1006PHL           | Gp0023048      | AOCV01           | 172437          | opportunistic pathogen; model organism                | 36,348    | 45,00    | 1459         | 470            | 12410   | 39,5                  | Illumina              |
| Mucor heterogamus                 | Mucoromycota       | Mucoromycotina      | none                  | none               | Mucorales         | Mucoraceae          | NRRL 1489         | G00118600      | 1085225          | 332253          | soil-associated; homothallic                          | 54,49     | 285,03   | 1219         | 1219           | 14998   |                       | PacBio                |
| Mucor indicus                     | Muc                |                     |                       |                    |                   |                     |                   |                |                  |                 |                                                       |           |          |              |                |         |                       |                       |

|                              |               |                   |      |      |              |               |                 |           |         |                          |       |       |      |      |      |                |
|------------------------------|---------------|-------------------|------|------|--------------|---------------|-----------------|-----------|---------|--------------------------|-------|-------|------|------|------|----------------|
| Linderina pennispora         | Zoopagomycota | Kickxellomycotina | none | none | Kickxellales | Kickxellaceae | ATCC 12442 v1.0 | Gp0036322 | 1019509 | 243942 saprotroph (soil) | 26,2  | 1     | 227  | 227  | 9351 | PacBio         |
| Martensiomycetes pterosporus | Zoopagomycota | Kickxellomycotina | none | none | Kickxellales | Kickxellaceae | CBS 209.56      | Gp0093918 | 1040168 | 251778 saprotroph        | 19,82 | 115,7 | 1156 | 529  | 8435 | Illumina HiSeq |
| Ramicandelaber brevisporus   | Zoopagomycota | Kickxellomycotina | none | none | Kickxellales | Kickxellaceae | CBS 109374      | Gp0093945 | JGI     | 251765 saprotroph (soil) | 25,53 | 168,2 | 2789 | 1262 | 9281 | Illumina HiSeq |
