# Supplementary material for: A plant pathology perspective of fungal genome sequencing
Source: PubMed Central journal article supplement — IMA Fungus. 2017 Feb 9;8(1):1–15. doi: 10.5598/imafungus.2017.08.01.01 (PMC5493528; doi:10.5598/imafungus.2017.08.01.01), 2017-02-09
Supplement: SD2.pdf [file SD2.pdf]

## Supplementary File 2: Cash crops, Food crops, and Gymnosperms

**CASH CROP PATHOGENS**

| <b>SPECIES</b>            | <b>Significance</b>                        | <b>Classification</b> | <b>Genome</b>    |
|---------------------------|--------------------------------------------|-----------------------|------------------|
|                           |                                            | <b>PHYLUM</b>         | <b>Accession</b> |
| Ashbya gossypii           | plant pathogen (insect-associated; cotton) | Ascomycota            | Gp0000589        |
| Ceratocystis adiposa      | plant pathogen (black root in sugar cane)  | Ascomycota            | Gp0149937        |
| Colletotrichum falcatum   | plant pathogen (sugar-cane red rot)        | Ascomycota            | Gp0124244        |
| Colletotrichum phormii    | plant pathogen (anthracnose on flax)       | Ascomycota            | Go0111565        |
| Colletotrichum simmondsii | plant pathogen (safflower oil crop)        | Ascomycota            | Gp0122385        |
| Phoma herbarum            | plant pathogen (hop & hemp)                | Ascomycota            | Gp0144010        |
| Sporisorium scitamineum   | plant pathogen (sugarcane); smut           | Basidiomycota         | Gp0118304        |
| Verticillium longisporum  | plant pathogen (canola)                    | Ascomycota            | Gp0143280        |

## GYMNOSPERM PATHOGENS

| SPECIES                             | Significance                                                | Classification | Genome    |
|-------------------------------------|-------------------------------------------------------------|----------------|-----------|
|                                     |                                                             | PHYLUM         | Accession |
| <i>Aplosporella prunicola</i>       | probable tree pathogen                                      | Ascomycota     | Gp0019419 |
| <i>Armillaria ostoyae</i>           | plant pathogen; conifer root rot (parasitic or saprophytic) | Basidiomycota  |           |
| <i>Botryosphaeria dothidea</i>      | plant pathogen (broad host range of trees and shrubs)       | Ascomycota     | Gp0038455 |
| <i>Caloscypha fulgens</i>           | plant pathogen (seed rot of conifers)                       | Ascomycota     |           |
| <i>Ceraceosorus bombacis</i>        | plant pathogen (lumber tree); smut                          | Basidiomycota  | Gp0143854 |
| <i>Ceraceosorus</i> sp.             | plant pathogen (lumber tree); smut                          | Basidiomycota  | Gp0095870 |
| <i>Ceratocystis albifundus</i>      | plant pathogen (woody & herbaceous)                         | Ascomycota     | Gp0109102 |
| <i>Ceratocystis eucalypticola</i>   | probable plant pathogen (eucalyptus)                        | Ascomycota     | Gp0121626 |
| <i>Ceratocystis platani</i>         | plant pathogen (trees)                                      | Ascomycota     | Gp0117548 |
| <i>Chrysoporthe austroafricana</i>  | plant pathogen (eucalyptus, Tibouchina, Syzygium)           | Ascomycota     | Gp0146002 |
| <i>Chrysoporthe cubensis</i>        | plant pathogen (eucalyptus, Tibouchina, Syzygium)           | Ascomycota     | Gp0117564 |
| <i>Chrysoporthe deuterocubensis</i> | plant pathogen (eucalyptus, Tibouchina, Syzygium)           | Ascomycota     | Gp0117565 |
| <i>Colletotrichum salicis</i>       | plant pathogen (black canker of willow)                     | Ascomycota     | Gp0090026 |
| <i>Cronartium comandrae</i>         | plant pathogen; rust fungus (pine)                          | Basidiomycota  | Gp0038527 |
| <i>Cronartium quercuum</i>          | plant pathogen; rust fungus (fusiform rust of pine)         | Basidiomycota  | Gp0004798 |
| <i>Cronartium ribicola</i>          | plant pathogen; rust fungus (pine)                          | Basidiomycota  | Gp0038568 |
| <i>Cryphonectria parasitica</i>     | plant pathogen (chestnut blight)                            | Ascomycota     | Gp0002604 |
| <i>Diplodia pinea</i>               | plant pathogen (pines)                                      | Ascomycota     | Gp0093398 |
| <i>Diplodia scrobiculata</i>        | plant pathogen (conifer spp.)                               | Ascomycota     | Gp0143864 |
| <i>Endocronartium harknessii</i>    | plant pathogen; rust fungus (pine-pine gall rust)           | Basidiomycota  | Gp0038528 |
| <i>Fusarium circinatum</i>          | plant pathogen (pitch canker of pines)                      | Ascomycota     | Gp0005151 |
| <i>Grosmannia clavigera</i>         | plant pathogen; blue stain                                  | Ascomycota     | Gp0002583 |
| <i>Heterobasidion annosum</i>       | plant pathogen (conifers)                                   | Basidiomycota  | Gp0093680 |
| <i>Heterobasidion irregulare</i>    | plant pathogen (conifers and hardwoods)                     | Basidiomycota  | Gp0002642 |
| <i>Hymenoscyphus fraxineus</i>      | plant pathogen (ash dieback)                                | Ascomycota     | Gp0124450 |
| <i>Lecanosticta acicola</i>         | plant pathogen (pine)                                       | Ascomycota     | Gp0047147 |
| <i>Leptographium procerum</i>       | plant pathogen (pine)                                       | Ascomycota     | Gp0107386 |
| <i>Marssonina brunnea</i>           | plant pathogen (poplar leaf spot)                           | Ascomycota     | Gp0038386 |
| <i>Melampsora allii-populina</i>    | plant pathogen; rust fungus (poplar)                        | Basidiomycota  | Gp0047015 |
| <i>Melampsora larici-populina</i>   | plant pathogen (poplar); rust fungus                        | Basidiomycota  | Gp0002503 |
| <i>Melampsora pinitorqua</i>        | plant pathogen (pine twisting rust); rust fungus            | Basidiomycota  | Gp0038564 |
| <i>Mycosphaerella laricina</i>      | plant pathogen (larch)                                      | Ascomycota     | Gp0047149 |
| <i>Mycosphaerella pini</i>          | plant pathogen (pine)                                       | Ascomycota     | Gp0017021 |
| <i>Ophiostoma novo-ulmi</i>         | plant pathogen (Dutch Elm Disease)                          | Ascomycota     | Gp0038489 |
| <i>Phellinus noxius</i>             | plant pathogen (broad host range, typically trees)          | Basidiomycota  | Gp0070880 |
| <i>Porodaedalea chrysoloma</i>      | plant pathogen (conifer parasite; white pocket rot)         | Basidiomycota  | Go0033091 |
| <i>Porodaedalea niemelaei</i>       | plant pathogen (conifer white rot)                          | Basidiomycota  | Go0072274 |
| <i>Setomelanomma holmii</i>         | plant pathogen (spruce needle drop)                         | Ascomycota     | Gp0036261 |
| <i>Sphaerulina musiva</i>           | plant pathogen (poplar)                                     | Ascomycota     | Gp0008704 |
| <i>Sphaerulina populicola</i>       | plant pathogen (poplar)                                     | Ascomycota     | Gp0048413 |
| <i>Taphrina populina</i>            | plant pathogen (cottonwood)                                 | Ascomycota     | Gp0124247 |
| <i>Teratosphaeria nubilosa</i>      | plant pathogen (leaf spot of <i>Eucalyptus</i> )            | Ascomycota     | Gp0036290 |
| <i>Thielaviopsis paradoxa</i>       | plant pathogen (palm)                                       | Ascomycota     | Gp0144032 |

FOOD CROP PATHOGENS

| SPECIES                               | Significance                                                 | Staple crop? | Classification | Genome    |
|---------------------------------------|--------------------------------------------------------------|--------------|----------------|-----------|
|                                       |                                                              |              | PHYLUM         | Accession |
| <b>Grains</b>                         |                                                              |              |                |           |
| <i>Bipolaris maydis</i>               | plant pathogen (wheat)                                       | x            | Ascomycota     | Gp0003183 |
| <i>Bipolaris oryzae</i>               | plant pathogen (rice)                                        | x            | Ascomycota     | Gp0010035 |
| <i>Bipolaris sorokiniana</i>          | plant pathogen (cereals)                                     | x            | Ascomycota     | Gp0004797 |
| <i>Bipolaris victoriae</i>            | plant pathogen (blight of oats)                              | x            | Ascomycota     | Gp0010034 |
| <i>Bipolaris zeicola</i>              | plant pathogen (sorghum, maize and apple)                    | x            | Ascomycota     | Gp0010036 |
| <i>Blumeria graminis</i>              | plant pathogen (mildew on grasses and cereals)               | x            | Ascomycota     | Gp0038457 |
| <i>Cercospora zeae-maydis</i>         | plant pathogen (maize); toxin-producing                      | x            | Ascomycota     | Gp0002172 |
| <i>Claviceps fusiformis</i>           | plant pathogen (pearl millet)                                | x            | Ascomycota     | Gp0038970 |
| <i>Claviceps purpurea</i>             | plant pathogen (cereals)                                     | x            | Ascomycota     | Gp0038662 |
| <i>Cochliobolus lunatus</i>           | plant pathogen (sorghum); pharmaceutical importance          | x            | Ascomycota     | Gp0039341 |
| <i>Colletotrichum graminicola</i>     | plant pathogen (anthracnose in cereals)                      | x            | Ascomycota     | Gp0004788 |
| <i>Colletotrichum sublineola</i>      | plant pathogen (anthracnose in wild rice and sorghum)        | x            | Ascomycota     | Gp0094476 |
| <i>Fusarium acuminatum</i>            | plant pathogen (cereals)                                     | x            | Ascomycota     | Gp0043378 |
| <i>Fusarium avenaceum</i>             | plant pathogen (generalist, including grain crops)           | x            | Ascomycota     | Gp0143156 |
| <i>Fusarium equiseti</i>              | plant pathogen (members of the Leguminosae and some cereals) | x            | Ascomycota     | Gp0044229 |
| <i>Fusarium fujikuroi</i>             | plant pathogen (rice)                                        | x            | Ascomycota     | Gp0039409 |
| <i>Fusarium graminearum</i>           | plant pathogen (wheat and barley)                            | x            | Ascomycota     | Gp0086804 |
| <i>Fusarium nygamai</i>               | plant pathogen (rice)                                        | x            | Ascomycota     | Gp0124341 |
| <i>Fusarium pseudograminearum</i>     | plant pathogen (wheat)                                       | x            | Ascomycota     | Gp0043380 |
| <i>Fusarium temperatum</i>            | plant pathogen (maize); opportunistic human pathogen         | x            | Ascomycota     | Gp0093049 |
| <i>Fusarium verticillioides</i>       | plant pathogen (maize)                                       | x            | Ascomycota     | Gp0002615 |
| <i>Gaeumannomyces graminis</i>        | plant pathogen (root rot of cereals)                         | x            | Ascomycota     | Gp0005124 |
| <i>Magnaporthe oryzae</i>             | plant pathogen (rice)                                        | x            | Ascomycota     | Gp0039276 |
| <i>Melanconium</i> sp. 1 NRRL 54901   | plant pathogen (probable maize pathogen)                     | x            | Ascomycota     | Gp0019267 |
| <i>Parastagonospora nodorum</i>       | plant pathogen (wheat)                                       | x            | Ascomycota     | Gp0002465 |
| <i>Puccinia graminis</i>              | plant pathogen; rust fungus (cereals)                        | x            | Basidiomycota  | Gp0002677 |
| <i>Puccinia sorghi</i>                | plant pathogen (maize); rust                                 | x            | Basidiomycota  | Gp0118202 |
| <i>Puccinia striiformis</i>           | plant pathogen (wheat); rust fungus                          | x            | Basidiomycota  | Gp0039222 |
| <i>Puccinia triticina</i>             | plant pathogen (wheat, barley, rye); rust fungus             | x            | Basidiomycota  | Gp0005826 |
| <i>Pyrenophora seminiperda</i>        | plant pathogen (necrotrophic; seeds of grasses/cereals)      | x            | Ascomycota     | Gp0037221 |
| <i>Pyrenophora teres</i>              | plant pathogen (barley and some other crops)                 | x            | Ascomycota     | Gp0008318 |
| <i>Pyrenophora tritici-repentis</i>   | plant pathogen (cereals and grasses; necrotrophic)           | x            | Ascomycota     | Gp0003140 |
| <i>Ramularia collo-cygni</i>          | plant pathogen (barley)                                      | x            | Ascomycota     | Gs0120586 |
| <i>Sarocladium oryzae</i>             | plant pathogen (rice sheath rot)                             | x            | Ascomycota     |           |
| <i>Sclerotinia borealis</i>           | plant pathogen (cereals; sychrophilic)                       | x            | Ascomycota     | Gp0070994 |
| <i>Setosphaeria turcica</i>           | plant pathogen (maize)                                       | x            | Ascomycota     | Gp0008856 |
| <i>Sporisorium reilianum</i>          | plant pathogen (maize); smut                                 | x            | Basidiomycota  | Gp0038426 |
| <i>Tilletia caries</i>                | plant pathogen (bunt of wheat)                               | x            | Basidiomycota  | Gp0150383 |
| <i>Tilletia controversa</i>           | plant pathogen (dwarf bunt of wheat)                         | x            | Basidiomycota  | Gp0150384 |
| <i>Tilletia horrida</i>               | plant pathogen (rice); smut                                  | x            | Basidiomycota  | Gp0118397 |
| <i>Tilletia indica</i>                | plant pathogen (Karnal bunt on wheat an triticale)           | x            | Basidiomycota  | Gp0150415 |
| <i>Ustilaginoidea virens</i>          | plant pathogen (rice)                                        | x            | Ascomycota     | Gp0115332 |
| <i>Ustilago esculenta</i>             | plant pathogen (wild rice); smut                             | x            | Basidiomycota  | Gp0109108 |
| <i>Ustilago hordei</i>                | plant pathogen (barley); smut                                | x            | Basidiomycota  | Gp0038438 |
| <i>Ustilago maydis</i>                | plant pathogen (maize and teosinte); smut                    | x            | Basidiomycota  | Gp0000206 |
| <i>Villosiclava virens</i>            | plant pathogen; (false smut of rice)                         | x            | Ascomycota     | Gp0094980 |
| <i>Zymoseptoria passerinii</i>        | plant pathogen (barley leaf blotch)                          | x            | Ascomycota     | Gp0010309 |
| <i>Zymoseptoria tritici</i>           | plant pathogen (wheat leaf blotch)                           | x            | Ascomycota     | Gp0010420 |
| <b>Fruit</b>                          |                                                              |              |                |           |
| <i>Alternaria arborescens</i>         | plant pathogen (tomato)                                      |              | Ascomycota     | Gp0038059 |
| <i>Botryotinia fuckeliana</i>         | plant pathogen (grapevines)                                  |              | Ascomycota     | Gp0002499 |
| <i>Ceratocystis manginecans</i>       | plant pathogen (mango)                                       |              | Ascomycota     | Gp0097242 |
| <i>Cladosporium fulvum</i>            | plant pathogen (leaf mold)                                   |              | Ascomycota     |           |
| <i>Colletotrichum fioriniae</i>       | plant pathogen (anthracnose in crops and wild plants)        |              | Ascomycota     | Gp0019317 |
| <i>Dactylonectria macrodidyma</i>     | plant pathogen (grapevine, avocado, and olive)               |              | Ascomycota     | Gp0117674 |
| <i>Diplodia seriata</i>               | plant pathogen (grapevine bot canker)                        |              | Ascomycota     | Gp0117696 |
| <i>Eremothecium cymbalariae</i>       | plant pathogen (stigmatomycosis; fruit rot; crops)           |              | Ascomycota     | Gp0008918 |
| <i>Erysiphe necator</i>               | plant pathogen ( powdery mildew of grape)                    |              | Ascomycota     | Gp0117742 |
| <i>Eutypa lata</i>                    | plant pathogen; grapevine dieback                            |              | Ascomycota     | Gp0039198 |
| <i>Geotrichum candidum</i>            | plant pathogen (citrus)                                      |              | Ascomycota     | Gp0106203 |
| <i>Guignardia citricarpa</i>          | plant pathogen (citrus)                                      |              | Ascomycota     | Gp0041977 |
| <i>Huntia omanensis</i>               | plant pathogen (weak mango pathogen)                         |              | Ascomycota     | Gp0121623 |
| <i>Meira nashicola</i>                | probable plant pathogen (pear)                               |              | Basidiomycota  | Gp0144018 |
| <i>Moniliophthora perniciosa</i>      | plant pathogen (cacao)                                       |              | Basidiomycota  | Gp0002607 |
| <i>Mycosphaerella eumusae</i>         | plant pathogen (banana)                                      |              | Ascomycota     | Gp0143045 |
| <i>Mycosphaerella fijiensis</i>       | plant pathogen (leaf spot of banana)                         |              | Ascomycota     | Gp0002650 |
| <i>Neofusicoccum parvum</i>           | plant pathogen (grapevines)                                  |              | Ascomycota     | Gp0039200 |
| <i>Neonectria ditissima</i>           | plant pathogen (apple canker)                                |              | Ascomycota     | Gp0144542 |
| <i>Passalora (Cladosporium) fulva</i> | plant pathogen (tomato)                                      |              | Ascomycota     | Gp0039398 |
| <i>Peltaster fructicola</i>           | plant pathogen (apples)                                      |              | Ascomycota     | Gp0143846 |
| <i>Phaeoacremonium aleophilum</i>     | plant pathogen (grapevine trunk disease)                     |              | Ascomycota     | Gp0039199 |
| <i>Phaeoconiella chlamydospora</i>    | plant pathogen (grapevine trunk disease)                     |              | Ascomycota     | Gp0118145 |
| <i>Phyllosticta citriasiana</i>       | plant pathogen (citrus tan spot)                             |              | Ascomycota     | Gp0032376 |
| <i>Phyllosticta citricarpa</i>        | plant pathogen (citrus black spot)                           |              | Ascomycota     | Gp0144687 |

|                                       |                                                                             |   |               |           |
|---------------------------------------|-----------------------------------------------------------------------------|---|---------------|-----------|
| Plenodomus tracheiphilus              | plant pathogen (citrus)                                                     |   | Ascomycota    | Gp0039845 |
| Pseudocercospora musae                | plant pathogen (banana)                                                     |   | Ascomycota    | Gp0143044 |
| Puccinia psidii                       | plant pathogen; rust fungus (guava)                                         |   | Basidiomycota | Gp0144693 |
| Pyrenochaeta lycopersici              | plant pathogen (tomato)                                                     |   | Ascomycota    | Gp0090025 |
| Rosellinia necatrix                   | plant pathogen (fruits)                                                     |   | Ascomycota    | Gp0146048 |
| Stemphylium lycopersici               | plant pathogen (fruits)                                                     |   | Ascomycota    | Gp0118324 |
| Taphrina deformans                    | plant pathogen (peach)                                                      |   | Ascomycota    | Gp0038420 |
| Taphrina flavorubra                   | plant pathogen (Prunus fruit)                                               |   | Ascomycota    | Gp0103452 |
| Taphrina wiesneri                     | plant pathogen (cherry trees)                                               |   | Ascomycota    | Gp0103453 |
| Thielaviopsis punctulata              | plant pathogen (date palm)                                                  |   | Ascomycota    | Gp0118396 |
| Valsa mali                            | plant pathogen (apple & pear)                                               |   | Ascomycota    | Gp0118828 |
| Venturia pyrina                       | plant pathogen (hemibiotrophic; pear)                                       |   | Ascomycota    | Gp0095335 |
| <b>Vegetables</b>                     |                                                                             |   |               |           |
| Alternaria brassicicola               | plant pathogen (Brassica dark leaf spot)                                    |   | Ascomycota    | Gp0002466 |
| Athelia rolfsii                       | plant pathogen (blight of vegetables)                                       |   | Basidiomycota | Gp0106003 |
| Ceratocystis fimbriata                | plant pathogen (sweet potato)                                               | x | Ascomycota    | Gp0006908 |
| Colletotrichum higginsianum           | plant pathogen (anthracnose in Brassicaceae)                                |   | Ascomycota    | Gp0008317 |
| Fusarium sambucinum                   | plant pathogen (potato dry rot); mycotoxin-producing                        | x | Ascomycota    | Gp0144734 |
| Helminthosporium solani               | plant pathogen (potato)                                                     | x | Ascomycota    | Gp0047673 |
| Leptosphaeria maculans                | plant pathogen (Brassica crops)                                             |   | Ascomycota    | Gp0010336 |
| Ophiognomonium clavignenti-juglans    | plant pathogen (butternut)                                                  |   | Ascomycota    | Gp0008964 |
| Plectosphaerella cucumerina           | plant pathogen (blight of cucurbits); nematophagous                         |   | Ascomycota    |           |
| Sclerotinia sclerotiorum              | plant pathogen (broadest host range known)                                  |   | Ascomycota    | Gp0002703 |
| <b>Legumes</b>                        |                                                                             |   |               |           |
| Ascochyta rabiei                      | plant pathogen (blight on chickpea)                                         |   | Ascomycota    | Gp0150874 |
| Colletotrichum incanum                | plant pathogen (broad host range; including soybean)                        |   | Ascomycota    | Gp0150230 |
| Diaporthe aspalathi                   | plant pathogen (soybean stem canker)                                        | x | Ascomycota    | Gp0144055 |
| Diaporthe longicolla                  | plant pathogen (soybean)                                                    | x | Ascomycota    | Gp0038530 |
| Eremothecium coryli                   | plant pathogen (soybean)                                                    | x | Ascomycota    | Gp0097267 |
| Erysiphe pisi                         | plant pathogen (powdery mildew of pea)                                      |   | Ascomycota    | Gp0008359 |
| Fusarium virguliforme                 | plant pathogen (soybean)                                                    | x | Ascomycota    | Gp0038801 |
| Monilophthora roleri                  | plant pathogen (pod rot of cacao)                                           |   | Basidiomycota | Gp0049167 |
| Mycosphaerella arachidis (Cercospora) | plant pathogen (leaf spot on peanuts)                                       |   | Ascomycota    | Gp0150604 |
| Puccinia arachidis                    | plant pathogen (peanut)                                                     |   | Basidiomycota | Gp0118201 |
| Uromyces viciae-fabae                 | plant pathogen (beans); rust                                                |   | Basidiomycota | Gp0117703 |
| <b>Multiple food crop types</b>       |                                                                             |   |               |           |
| Alternaria alternata                  | plant pathogen (leaf spot)                                                  |   | Ascomycota    | Gp0047507 |
| Cercospora canescens                  | plant pathogen (leaf spot of various bean crops and tomato)                 |   | Ascomycota    | Gp0037543 |
| Colletotrichum gloeosporioides        | plant pathogen (disease and anthracnose on a range of fruit and vegetables) |   | Ascomycota    | Gp0038653 |
| Colletotrichum orbiculare             | plant pathogen (melons and cucumber)                                        |   | Ascomycota    | Gp0038654 |
| Corynespora cassicola                 | plant pathogen (broad host range)                                           | x | Ascomycota    | Gp0086748 |
| Fusarium oxysporum                    | plant pathogen (broad host range)                                           |   | Ascomycota    | Gp0037083 |
| Macrophomina phaseolina               | plant pathogen (broad host range)                                           | x | Ascomycota    | Gp0044758 |
| Nectria haematococca                  | plant pathogen (broad host range)                                           | x | Ascomycota    | Gp0017718 |
| Rhizoctonia solani                    | plant pathogen (broad host range)                                           | x | Basidiomycota | Gp0041102 |
| Verticillium alfalfae                 | plant pathogen (broad host range); wilt disease                             |   | Ascomycota    | Gp0005850 |
| Verticillium dahliae                  | plant pathogen (broad host range); wilt disease                             |   | Ascomycota    | Gp0003474 |
