# Supplementary material for: A plant pathology perspective of fungal genome sequencing
Source: PubMed Central journal article supplement — IMA Fungus. 2017 Feb 9;8(1):1–15. doi: 10.5598/imafungus.2017.08.01.01 (PMC5493528; doi:10.5598/imafungus.2017.08.01.01), 2017-02-09
Supplement: SD3.pdf [file SD3.pdf]

## Supplementary File 3

## **Phylogenetic placement of fungal orders described after Hibbett *et al.* (2007).**

### **ASCOMYCOTA**

(Lumbsch & Huhndorf, 2010)

- Abrothallales: (Pérez-Ortega *et al.*, 2014)
- Acrospermales, Dyfrolomycetales, Monoblastiales, Lichenotheliales, Strigulales: (Wijayawardene *et al.*, 2014)
- Amphisphaeriales: (Senanayake *et al.*, 2015)
- Archaeorhizomycetes: (Rosling *et al.*, 2011)
- Ascosphaerales & Arachnomycetales: (Kirk *et al.*, 2008)
- Asterinales: (Hongsanan *et al.*, 2014)
- Asterotexiales: (Guatimosim *et al.*, 2014)
- Celotheliales: (Gueidan *et al.*, 2014)
- Dothideomycete families: (Schoch *et al.*, 2009a; Wijayawardene *et al.*, 2014)
- Eremithallales: (Lucking *et al.*, 2008)
- Geoglossomycetes & Geoglossales: (Schoch *et al.*, 2009b)
- Lecanoromycete families: (Miadlikowska *et al.*, 2014)
- Lecanoromycete orders (Arctomiales, Caliciales, Hymeneliales, Sarrameanales, Trapeliales): (Miadlikowska *et al.*, 2014)
- Lecideales: (Schmull *et al.*, 2011)
- Leotiomycete families: (Wang *et al.*, 2006)
- Mytilinidiales: (Boehm *et al.*, 2009)
- Natipusillales: (Hongsanan *et al.*, 2014)
- Phaeomoniellales: (Chen *et al.*, 2015)
- Saccharomycotina families: (Kurtzman, 2011)
- Sordariomycete families and orders (Amplistromatales, Annulatascales, Cordanales, Falcocladiales, Glomerellales, Jobellisiales, Koralionastetales, Magnaporthales, Pisorisporiales, Savoryellales, Togniniales): (Maharachchikumbura *et al.*, 2015)
- Taxonomic confusion exists at almost all taxonomic levels within the Leotiomycetes: (Johnston *et al.*, 2014)
- Trapeliales & Sarrameanales: (Hodkinson & Lendemer, 2011)
- Trypetheliales: (Hyde *et al.*, 2013)
- Tubeufiales: (Boonmee *et al.*, 2014)
- Umbilicariales: (Miadlikowska *et al.*, 2014)
- Valsariales: (Jaklitsch *et al.*, 2015)
- Venturiales: (Wijayawardene *et al.*, 2014; Zhang *et al.*, 2011)
- Xylonomycetes: (Gazis *et al.*, 2012)

## **BASIDIOMYCOTA**

- Amylocorticiales & Jaapiales: (Binder *et al.*, 2010) Jaapiales is sister to Agaricomycetidae
- Ceraceosorales: (Wang *et al.*, 2015)
- Geminibasidiales: (Nguyen *et al.*, 2013)
- Geminibasidiomycetes: (Nguyen *et al.*, 2015)
- Golubeviales: (Wang *et al.*, 2015)
- Holtermanniales: (Liu *et al.*, 2015)
- Kriegeriales: (Toome *et al.*, 2013)
- Lepidostromatales: (Hodkinson *et al.*, 2014)
- Moniliellales: (Wang *et al.*, 2014)
- Robbauerales: (Wang *et al.*, 2015)
- Trichosporonales: (Liu *et al.*, 2015)
- Tritirachiomycetes: (Schell *et al.*, 2011)
- Wallemiomycetes at base of Agaricomycotina: (Nguyen *et al.*, 2013)

## **EARLY-DIVERGING FUNGI**

- Basidiobolales (Gryganskyi *et al.*, 2012)
- Cladochytriales (Mozley-Standridge *et al.*, 2009)
- Lobulomycetales (Simmons *et al.*, 2009)
- Mortierellomycotina (Hoffmann *et al.*, 2011)
- Olpidiomycota: Index Fungorum no. 42, Effectively published 27/12/2013 22:02:48 (ISSN 2049-2375), Nomenclatural novelties: Alexander B. Doweld; Publication Name: Index Fungorum 42: 1. 28 Dec 2013.
- Rhizophlyctidales (Letcher *et al.*, 2008)

## REFERENCES

- Binder, M., Larsson, K.-H., Matheny, P. B. & Hibbett, D. S. (2010).** Amylocorticiales ord. nov. and Jaapiales ord. nov.: Early diverging clades of Agaricomycetidae dominated by corticioid forms. *Mycologia* **102**, 865-880.
- Boehm, E. W. A., Schoch, C. L. & Spatafora, J. W. (2009).** On the evolution of the Hysteriaceae and Mytilinidiaceae (Pleosporomycetidae, Dothideomycetes, Ascomycota) using four nuclear genes. *Mycological Research* **113**, 461-479.
- Boonmee, S., Rossman, A. Y., Liu, J.-K., Li, W.-J., Dai, D.-Q., Bhat, J. D., Jones, E. G., McKenzie, E. H., Xu, J.-C. & Hyde, K. D. (2014).** Tubeufiales, ord. nov., integrating sexual and asexual generic names. *Fungal Diversity* **68**, 239-298.
- Chen, K.-H., Miadlikowska, J., Molnár, K., Arnold, A. E., U'Ren, J. M., Gaya, E., Gueidan, C. & Lutzoni, F. (2015).** Phylogenetic analyses of eurotiomycetous endophytes reveal their close affinities to Chaetothyriales, Eurotiales, and a new order – Phaeomoniellales. *Molecular Phylogenetics and Evolution* **85**, 117-130.
- Gazis, R., Miadlikowska, J., Lutzoni, F., Arnold, A. E. & Chaverri, P. (2012).** Culture-based study of endophytes associated with rubber trees in Peru reveals a new class of Pezizomycotina: Xylonomycetes. *Molecular Phylogenetics and Evolution* **65**, 294-304.
- Gryganskyi, A. P., Humber, R. A., Smith, M. E., Miadlikovska, J., Wu, S., Voigt, K., Walther, G., Anishchenko, I. M. & Vilgalys, R. (2012).** Molecular phylogeny of the Entomophthoromycota. *Molecular Phylogenetics and Evolution* **65**, 682-694.
- Guatimosim, E., Firmino, A., Bezerra, J., Pereira, O., Barreto, R. & Crous, P. (2014).** Towards a phylogenetic reappraisal of Parmulariaceae and Asterinaceae (Dothideomycetes). *Persoonia-Molecular Phylogeny and Evolution of Fungi*.
- Gueidan, C., Aptroot, A., da Silva Cáceres, M. E., Badali, H. & Stenroos, S. (2014).** A reappraisal of orders and families within the subclass Chaetothyriomycetidae (Eurotiomycetes, Ascomycota). *Mycological Progress* **13**, 1027-1039.
- Hodkinson, B. P. & Lendemer, J. C. (2011).** The orders of Ostropomycetidae (Lecanoromycetes, Ascomycota): recognition of Sarrameanales and Trapeliales with a request to retain Pertusariales over Agyriales. *Phytologia* **93**, 407-412.
- Hodkinson, B. P., Moncada, B. & Lücking, R. (2014).** Lepidostromatales, a new order of lichenized fungi (Basidiomycota, Agaricomycetes), with two new genera, *Ertzia* and *Sulzbacheromyces*, and one new species, *Lepidostroma winklerianum*. *Fungal Diversity* **64**, 165-179.
- Hoffmann, K., Voigt, K. & Kirk, P. (2011).** Mortierellomycotina subphyl. nov., based on multi-gene genealogies. *Mycotaxon* **115**, 353-363.
- Hongsanan, S., Li, Y.-M., Liu, J.-K., Hofmann, T., Piepenbring, M., Bhat, J. D., Boonmee, S., Doilom, M., Singtripop, C. & Tian, Q. (2014).** Revision of genera in Asterinales. *Fungal Diversity* **68**, 1-68.
- Hyde, K. D., Jones, E. G., Liu, J.-K., Ariyawansa, H., Boehm, E., Boonmee, S., Braun, U., Chomnunti, P., Crous, P. W. & Dai, D.-Q. (2013).** Families of Dothideomycetes. *Fungal Diversity* **63**, 1-313.

- Jaklitsch, W., Fournier, J., Dai, D., Hyde, K. & Voglmayr, H. (2015).** *Valsaria* and the Valsariales. *Fungal Diversity*, 1-44.
- Johnston, P. R., Seifert, K. A., Stone, J. K., Rossman, A. Y. & Marvanová, L. (2014).** Recommendations on generic names competing for use in Leotiomycetes (Ascomycota). *IMA Fungus* **5**, 91-120.
- Kirk, P. M., Cannon, P. F., Minter, D. W. & Stalpers, J. A. (2008).** Dictionary of the Fungi (10<sup>th</sup> edition). UK: CAB International.
- Kurtzman, C. P. (2011).** Phylogeny of the ascomycetous yeasts and the renaming of *Pichia anomala* to *Wickerhamomyces anomalus*. *Antonie van Leeuwenhoek* **99**, 13-23.
- Letcher, P. M., Powell, M. J., Barr, D. J., Churchill, P. F., Wakefield, W. S. & Picard, K. T. (2008).** Rhizophlyctidales—a new order in Chytridiomycota. *Mycological Research* **112**, 1031-1048.
- Liu, X. Z., Wang, Q. M., Göker, M., Groenewald, M., Kachalkin, A. V., Lumbsch, H. T., Millanes, A. M., Wedin, M., Yurkov, A. M., Boekhout, T., *et al.* (2015).** Towards an integrated phylogenetic classification of the Tremellomycetes. *Studies in Mycology* **81**, 85-147.
- Lucking, R., Lumbsch, H. T., Di Stefano, J. F., Lizano, D., Carranza, J., Bernecker, A., Chaves, J. L. & Umana, L. (2008).** *Eremithallus costaricensis* (Ascomycota: Lichinomycetes: Eremithallales), a new fungal lineage with a novel lichen symbiotic lifestyle discovered in an urban relict forest in Costa Rica. *Symbiosis* **46**, 161-170.
- Lumbsch, H. T. & Huhndorf, S. M. (2010).** Myconet Volume 14. Part One. Outline of Ascomycota—2009. Part Two. Notes on Ascomycete Systematics. Nos. 4751–5113. *Fieldiana Life and Earth Sciences* 10.3158/1557.1, 1-64.
- Maharachchikumbura, S. S., Hyde, K. D., Jones, E. G., McKenzie, E. H., Huang, S.-K., Abdel-Wahab, M. A., Daranagama, D. A., Dayarathne, M., D'souza, M. J. & Goonasekara, I. D. (2015).** Towards a natural classification and backbone tree for Sordariomycetes. *Fungal Diversity* **72**, 199-301.
- Miadlikowska, J., Kauff, F., Högnabba, F., Oliver, J. C., Molnár, K., Fraker, E., Gaya, E., Hafellner, J., Hofstetter, V. & Gueidan, C. (2014).** A multigene phylogenetic synthesis for the class Lecanoromycetes (Ascomycota): 1307 fungi representing 1139 infrageneric taxa, 317 genera and 66 families. *Molecular Phylogenetics and Evolution* **79**, 132-168.
- Mozley-Standridge, S. E., Letcher, P. M., Longcore, J. E., Porter, D. & Simmons, D. R. (2009).** Cladochytriales—a new order in Chytridiomycota. *Mycological Research* **113**, 498-507.
- Nguyen, H. D., Nickerson, N. L. & Seifert, K. A. (2013).** *Basidioascus* and *Geminibasidium*: a new lineage of heat-resistant and xerotolerant basidiomycetes. *Mycologia* **105**, 1231-1250.
- Nguyen, H. D., Chabot, D., Hirooka, Y., Roberson, R. W. & Seifert, K. A. (2015).** *Basidioascus undulatus*: genome, origins, and sexuality. *IMA Fungus* **6**, 215-231.
- Pérez-Ortega, S., Suija, A., Crespo, A. & de los Ríos, A. (2014).** Lichenicolous fungi of the genus *Abrothallus* (Dothideomycetes: Abrothallales ordo nov.) are sister to the predominantly aquatic Janhulales. *Fungal Diversity* **64**, 295-304.

- Rosling, A., Cox, F., Cruz-Martinez, K., Ihrmark, K., Grelet, G.-A., Lindahl, B. D., Menkis, A. & James, T. Y. (2011). Archaeorhizomycetes: unearthing an ancient class of ubiquitous soil fungi. *Science* **333**, 876-879.
- Schell, W. A., Lee, A. G. & Aime, M. C. (2011). A new lineage in Pucciniomycotina: class Tritirachiomycetes, order Tritirachiales, family Tritirachiaceae. *Mycologia* **103**, 1331-1340.
- Schmull, M., Miadlikowska, J., Pelzer, M., Stocker-Wörgötter, E., Hofstetter, V., Fraker, E., Hodkinson, B. P., Reeb, V., Kukwa, M. & Lumbsch, H. T. (2011). Phylogenetic affiliations of members of the heterogeneous lichen-forming fungi of the genus *Lecidea* sensu Zahlbruckner (Lecanoromycetes, Ascomycota). *Mycologia* **103**, 983-1003.
- Schoch, C., Crous, P. W., Groenewald, J. Z., Boehm, E., Burgess, T. I., De Gruyter, J., De Hoog, G. S., Dixon, L., Grube, M. & Gueidan, C. (2009a). A class-wide phylogenetic assessment of Dothideomycetes. *Studies in Mycology* **64**, 1-15.
- Schoch, C., Wang, Z., Townsend, J. & Spatafora, J. (2009b). Geoglossomycetes cl. nov., Geoglossales ord. nov. and taxa above class rank in the Ascomycota Tree of Life. *Persoonia* **22**, 129-138.
- Senanayake, I. C., Maharachchikumbura, S. S. N., Hyde, K. D., Bhat, J. D., Jones, E. B. G., McKenzie, E. H. C., Dai, D. Q., Daranagama, D. A., Dayarathne, M. C., Goonasekara, I. D., *et al.* (2015). Towards unraveling relationships in Xylariomycetidae (Sordariomycetes). *Fungal Diversity* **73**, 73-144.
- Simmons, D. R., James, T. Y., Meyer, A. F. & Longcore, J. E. (2009). Lobulomycetales, a new order in the Chytridiomycota. *Mycological Research* **113**, 450-460.
- Toome, M., Roberson, R. W. & Aime, M. C. (2013). *Meredithblackwellia eburnea* gen. et sp. nov., Kriegeriaceae fam. nov. and Kriegeriales ord. nov.—toward resolving higher-level classification in Microbotryomycetes. *Mycologia* **105**, 486-495.
- Wang, Q. M., Theelen, B., Groenewald, M., Bai, F. Y. & Boekhout, T. (2014). Moniliellomycetes and Malasseziomycetes, two new classes in Ustilaginomycotina. *Persoonia : Molecular Phylogeny and Evolution of Fungi* **33**, 41-47.
- Wang, Q. M., Begerow, D., Groenewald, M., Liu, X. Z., Theelen, B., Bai, F. Y. & Boekhout, T. (2015). Multigene phylogeny and taxonomic revision of yeasts and related fungi in the Ustilaginomycotina. *Studies in Mycology* **81**, 55-83.
- Wang, Z., Johnston, P. R., Takamatsu, S., Spatafora, J. W. & Hibbett, D. S. (2006). Toward a phylogenetic classification of the Leotiomycetes based on rDNA data. *Mycologia* **98**, 1065-1075.
- Wijayawardene, N. N., Crous, P. W., Kirk, P. M., Hawksworth, D. L., Boonmee, S., Braun, U., Dai, D.-Q., D'souza, M. J., Diederich, P. & Dissanayake, A. (2014). Naming and outline of Dothideomycetes–2014 including proposals for the protection or suppression of generic names. *Fungal Diversity* **69**, 1-55.
- Zhang, Y., Crous, P. W., Schoch, C. L., Bahkali, A. H., Guo, L. D. & Hyde, K. D. (2011). A molecular, morphological and ecological re-appraisal of Venturiales—a new order of Dothideomycetes. *Fungal Diversity* **51**, 249-277.
